# Supplementary material for: Impacts of DNA methylation on H2A.Z deposition and nucleosome stability
Source: eLife. 2026 Jul 7;15:RP109762. doi: 10.7554/eLife.109762 (PMC13341117; doi:10.7554/eLife.109762)
Supplement: Supplementary file 4. [file elife-109762-supp4.xlsx]

## Sheet: Filtered
								IgG		H2A.Z Ab
Accession	Description	ΣCoverage	Σ# Proteins	Σ# Unique Peptides	Σ# Peptides	Σ# PSMs	Estimated Concentration in Egg Extract (nM) (ref [58])	Abundance (IgG)	Abundance Normalized to Extract Conc	Abundance (H2AZ Ab)	Abundance Normalized to Extract Conc	Fold Enrichment (Ab/IgG)	# AAs	MW [kDa]	calc. pI
XBXL10_1g1206	XBmRNA1949| h2az1.L	58.59	1	4	7	53	90.0208	3.02936e+08	3.36518e+06	5.78523e+09	6.42654e+07	19.0972	128	13.4775	10.5503
XBXL10_1g13547	XBmRNA25743| MGC85536 (h2az2)	53.91	1	3	6	27	153.723	3.8929e+08	2.53241e+06	5.16897e+09	3.36252e+07	13.2779	128	13.5005	10.5796
XBXL10_1g12995	XBmRNA24600| pkm.L	55.25	2	11	27	163	4249.88	4.05703e+09	954622	10105797868	2.3779e+06	2.49094	590	64.1917	6.44287
XBXL10_1g15926	XBmRNA29748| pkm.S	51.23	3	5	21	110	1064.53	3.50196e+09	3.28969e+06	9.5522e+09	8.9732e+06	2.72767	527	57.4034	6.49365
XBXL10_1g2491	XBmRNA4339| LOC108715337	53.94	1	14	14	153	254.41	2.62497e+09	1.03179e+07	8.62019e+09	3.38831e+07	3.28393	406	44.9186	6.84424
XBXL10_1g42192	XBmRNA79320| krt19.S	57.59	15	10	27	98	376.915	8.44641e+09	2.24093e+07	7.18994e+09	1.90758e+07	0.851242	448	48.8843	5.56689
XBXL10_1g38937	XBmRNA73489| krt19.L	51.88	27	8	22	82	334.113	8.44641e+09	2.52801e+07	7.18994e+09	2.15195e+07	0.851242	426	46.6403	5.21143
XBXL10_1g6410	XBmRNA12051| ubb.L	87.07	9	8	8	104	#N/A	2.36924e+09	#N/A	6988275499	#N/A	#N/A	379	42.669	7.57666
XBXL10_1g40906	XBmRNA77180| ndufs1.L	42.43	2	26	26	58	896.698	6.52589e+07	72776.9	6.93594e+09	7.73498e+06	106.283	733	80.3861	6.78564
XBXL10_1g10736	XBmRNA20182| atp5f1b.S	78.1	2	3	28	167	4065.33	8.8958e+08	218821	6805356145	1.674e+06	7.65007	525	56.3385	5.40186
XBXL10_1g8084	XBmRNA15295| atp5f1b.L	72.38	2	2	27	167	1156.35	8.8958e+08	769303	6805356145	5.88522e+06	7.65007	525	56.3985	5.35107
XBXL10_1g17494	XBmRNA32250| LOC108703555	41.39	1	11	11	317	264.438	2.55347e+09	9.65623e+06	6.65683e+09	2.51735e+07	2.60697	447	49.1104	7.73779
XBXL10_1g3365	XBmRNA6137| atp5f1a.L	59.86	1	6	34	162	1393.64	9.04557e+08	649063	5700812458	4.0906e+06	6.30232	553	59.8508	9.1001
XBXL10_1g5885	XBmRNA11014| atp5f1a.S	51.55	1	4	32	145	3410.68	9.04557e+08	265213	5700812458	1.67146e+06	6.30232	582	63.1747	9.26123
XBXL10_1g38949	XBmRNA73506| krt12.5.L	9.96	23	1	8	37	10.9483	7.00025e+09	6.39393e+08	5.38329e+09	4.91702e+08	0.769014	452	49.3797	5.16064
XBXL10_1g42963	XBmRNA80750| zhx3.S	2.79	1	1	1	1	48.4528	0	0	5273483327	1.08838e+08	>1000	933	104.443	6.354
XBXL10_1g10868	XBmRNA20448| krt18.1.S	17.52	9	1	7	17	130.458	5.96023e+09	4.5687e+07	4.68655e+09	3.59239e+07	0.786304	428	47.441	5.2876
XBXL10_1g8280	XBmRNA15660| krt8.1.L	59.38	27	7	35	358	757.427	4.78313e+09	6.31497e+06	4.25407e+09	5.61647e+06	0.88939	512	56.3521	5.36377
XBXL10_1g10869	XBmRNA20449| krt8.1.S	52.47	23	5	29	302	126.583	4.42619e+09	3.49666e+07	3.87514e+09	3.06134e+07	0.875504	507	56.0291	5.30029
XBXL10_1g35194	XBmRNA66445| slc25a5.L	45.64	2	4	14	90	570.492	1.33208e+09	2.33497e+06	3.69235e+09	6.47222e+06	2.77187	298	32.9191	9.70068
XBXL10_1g38049	XBmRNA71913| slc25a5.S	40.94	1	2	12	80	2214	1.33208e+09	601661	3.69235e+09	1.66772e+06	2.77187	298	33.085	9.75928
XBXL10_1g3845	XBmRNA7032| slc25a4.S	22.15	2	1	7	43	802.326	1.28097e+09	1.59657e+06	3.6765e+09	4.5823e+06	2.8701	298	33.2574	9.70068
XBXL10_1g16785	XBmRNA31368| LOC121402047	26.48	30	4	11	47	1599.62	9.86736e+08	616858	3.59744e+09	2.24894e+06	3.64579	593	65.6593	10.8872
XBXL10_1g34635	XBmRNA65454| hspa5.L	13.37	2	6	9	32	2004.49	2.64692e+09	1.32049e+06	3311554288	1.65207e+06	1.2511	658	72.6425	5.07178
XBXL10_1g8279	XBmRNA15659| krt18.1.L	47.02	9	14	20	36	274.893	3.99303e+09	1.45257e+07	3.13928e+09	1.142e+07	0.78619	436	48.2963	5.30029
XBXL10_1g37055	XBmRNA69898| pklr.L	6.42	3	2	4	16	604.389	9.51184e+08	1.57379e+06	2.97225e+09	4.91778e+06	3.12479	545	60.0899	7.2251
XBXL10_1g9410	XBmRNA17544| pdha1.S	46	10	3	16	31	360.048	3.39192e+07	94207.4	2.90618e+09	8.07164e+06	85.6795	400	44.7093	7.60596
XBXL10_1g36174	XBmRNA68479| dtd2.L	72.62	1	11	11	70	138.904	1.1452e+09	8.24454e+06	2.80211e+09	2.01731e+07	2.44684	168	18.5845	7.29834
XBXL10_1g8291	XBmRNA15671| krt62.L	12.07	19	1	13	120	#N/A	2.72544e+09	#N/A	2.49105e+09	#N/A	#N/A	580	59.8049	5.71924
XBXL10_1g18947	XBmRNA34924| zpd.L	26.06	1	5	5	55	52.3998	8.06018e+08	1.53821e+07	2.40917e+09	4.59767e+07	2.98898	376	42.2332	6.21436
XBXL10_1g10877	XBmRNA20457| krt61.S	10.59	16	1	11	57	#N/A	2.69074e+09	#N/A	2.34899e+09	#N/A	#N/A	557	60.1702	8.20654
XBXL10_1g40988	XBmRNA77319| hspd1.L	48.09	1	6	23	102	1038.7	2.42389e+08	233358	1.96663e+09	1.89336e+06	8.11352	576	61.5427	6.30322
XBXL10_1g7446	XBmRNA14034| mdh2.L	71.3	2	4	18	75	1393.71	2.37268e+08	170242	1.94352e+09	1.39449e+06	8.19125	338	35.766	8.5874
XBXL10_1g10235	XBmRNA19144| mdh2.S	65.38	2	3	17	69	4723.76	2.37268e+08	50228.6	1.94352e+09	411435	8.19125	338	35.713	8.76318
XBXL10_1g43729	XBmRNA82320| hspd1.S	46.8	1	7	24	94	2759.8	2.42389e+08	87828.4	1.89058e+09	685041	7.79977	579	61.5956	5.8335
XBXL10_1g505	XBid49| LOC108696225	5.74	2	1	1	6	#N/A	712443684	#N/A	1.81455e+09	#N/A	#N/A	122	13.3625	6.75635
XBXL10_1g16228	XBmRNA30463| nap1l1.S	27.97	1	7	15	48	1355.04	7.45297e+07	55002	1.74883e+09	1.29062e+06	23.4649	547	63.6327	4.97021
XBXL10_1g12612	XBmRNA23607| nap1l1.L	27.23	1	3	9	35	744.561	7.45297e+07	100099	1.74883e+09	2.34881e+06	23.4649	393	45.4879	4.4751
XBXL10_1g5831	XBmRNA10905| txnl1.S	7.61	1	2	2	3	711.969	0	0	1.68271e+09	2.36347e+06	>1000	289	32.0739	5.05908
XBXL10_1g33026	XBmRNA62353| vdac2.S	41.49	1	9	10	42	1908.9	2.12713e+08	111432	1.65755e+09	868329	7.79244	282	30.124	7.04932
XBXL10_1g19981	XBmRNA36975| ruvbl1.L	50.88	1	3	18	76	126.267	5.73848e+07	454470	1.57532e+09	1.2476e+07	27.4518	456	50.3044	6.41748
XBXL10_1g22256	XBmRNA41375| ruvbl1.S	50.66	1	3	18	73	572.485	5.73848e+07	100238	1.57532e+09	2.75172e+06	27.4518	456	50.3575	6.41748
XBXL10_1g26329	XBmRNA49207| hadha.S	46.97	1	5	28	128	1824.33	4.07992e+08	223639	1.55776e+09	853882	3.81812	760	82.3072	8.93896
XBXL10_1g24613	XBmRNA46002| hadha.L	41.58	1	3	26	124	976.182	4.07992e+08	417946	1.55776e+09	1.59577e+06	3.81812	760	82.1681	8.95361
XBXL10_1g42707	XBmRNA80294| cox4i2.S	54.02	3	7	7	23	1320.63	2.10639e+08	159498	1.52189e+09	1.15239e+06	7.2251	174	20.5326	9.36377
XBXL10_1g24614	XBmRNA46003| hadhb.L	37.45	2	13	13	61	599.145	4.94723e+08	825715	1.47792e+09	2.46671e+06	2.98736	470	50.485	9.21729
XBXL10_1g32438	XBmRNA61189| phb2.S	60.13	1	7	17	68	1245.75	2.67324e+08	214589	1.44835e+09	1.16264e+06	5.41798	301	33.3339	9.90576
XBXL10_1g30119	XBmRNA56689| phb2.L	42.19	1	3	13	47	1330.61	2.67324e+08	200903	1.44835e+09	1.08849e+06	5.41798	301	33.2399	9.92041
XBXL10_1g31839	XBmRNA60086| ruvbl2.L	57.58	2	27	27	91	47.8087	0	0	1.41222e+09	2.9539e+07	>1000	462	51.1534	5.64307
XBXL10_1g6709	XBmRNA12572| pafah1b1.L	54.88	2	20	20	93	424.574	2.53459e+08	596973	1.34771e+09	3.17426e+06	5.31726	410	46.7472	7.37158
XBXL10_1g40211	XBmRNA75663| ndel1.L	46.86	1	7	22	97	4.30795	2.77402e+08	6.4393e+07	1.33585e+09	3.1009e+08	4.81558	350	39.144	5.38916
XBXL10_1g43184	XBmRNA81194| ndel1.S	49.6	1	8	23	92	16.0452	2.77402e+08	1.72887e+07	1.33585e+09	8.32553e+07	4.81558	373	42.2027	5.85889
XBXL10_1g17120	XBmRNA31731| LOC121402261	41.27	15	6	6	30	#N/A	9.43659e+07	#N/A	1.31077e+09	#N/A	#N/A	126	13.9256	10.3159
XBXL10_1g18217	XBmRNA33562| acta4.L	28.91	8	1	12	65	#N/A	9.56201e+08	#N/A	1.26667e+09	#N/A	#N/A	377	41.9569	5.38916
XBXL10_1g43812	XBmRNA82466| nde1.S	17.77	1	1	7	33	1.77357	2.50042e+08	1.40982e+08	1.25789e+09	7.09243e+08	5.03074	349	39.699	4.99561
XBXL10_1g41098	XBmRNA77557| nde1.L	14.61	1	1	6	28	#N/A	2.50042e+08	#N/A	1.24659e+09	#N/A	#N/A	349	39.6859	5.03369
XBXL10_1g4039	XBmRNA7379| gar1.S	25	1	1	9	37	226.924	1.08675e+09	4.78905e+06	1242108918	5.47368e+06	1.14296	228	23.1615	11.1069
XBXL10_1g19657	XBmRNA36365| mgst3.L	51.02	1	6	7	36	1652.5	2.42728e+08	146885	1.21659e+09	736213	5.01216	147	16.2124	9.39307
XBXL10_1g16040	XBmRNA29998| atp5f1c.S	42.35	1	4	10	42	1411.53	1.7147e+08	121478	1.10472e+09	782642	6.44268	307	33.9929	9.56885
XBXL10_1g12847	XBmRNA24261| atp5f1c.L	40.48	1	3	9	38	484.828	1.7147e+08	353672	1.10472e+09	2.27859e+06	6.44268	294	32.4031	9.53955
XBXL10_1g23317	XBmRNA43473| pcmt1.L	47.84	1	12	12	70	401.436	1.21983e+09	3.03867e+06	1.07603e+09	2.68045e+06	0.882112	301	32.3226	6.53662
XBXL10_1g13736	XBmRNA26129| vdac3.L	32.33	1	8	9	24	1373.89	1.09275e+08	79537.3	1.07475e+09	782271	9.83526	300	32.1254	9.34912
XBXL10_1g39134	XBmRNA73777| phb.L	66.18	2	7	15	55	1186.93	1.72529e+08	145358	1072560627	903642	6.21669	272	29.8318	5.41455
XBXL10_1g6361	XBmRNA11950| LOC108707913	35.63	1	15	15	62	121.78	4.78913e+08	3.9326e+06	1.06006e+09	8.70466e+06	2.21346	567	63.6263	6.45557
XBXL10_1g9435	XBmRNA17602| atp5pb.S	27.2	1	4	8	28	652.452	1.91363e+08	293298	1.05953e+09	1.62392e+06	5.53675	250	28.2162	9.5542
XBXL10_1g42365	XBmRNA79599| phb.S	73.16	1	7	15	49	1707.83	1.64462e+08	96298.7	1.04675e+09	612911	6.36469	272	29.8158	5.41455
XBXL10_1g3410	XBmRNA6228| vcp.L	47.83	2	2	32	166	276.018	3.36428e+08	1.21886e+06	1.04541e+09	3.78747e+06	3.10739	805	89.2286	5.30029
XBXL10_1g5918	XBmRNA11089| vcp.S	47.83	2	3	33	163	1739.92	3.36428e+08	193359	1.04541e+09	600840	3.10739	805	89.1236	5.30029
XBXL10_1g42548	XBmRNA79984| psma7.S	48.58	2	9	9	32	1990.14	1.92211e+08	96581.6	9.96253e+08	500595	5.18313	247	27.9177	8.5874
XBXL10_1g6676	XBmRNA12514| atp5pb.L	28.8	1	3	7	27	1570.62	1.79414e+08	114231	993560198	632592	5.53781	250	28.1762	9.61279
XBXL10_1g30178	XBmRNA56795| gapdh.L	33.03	1	5	10	34	5808.35	1.0532e+09	181325	9.20751e+08	158522	0.874242	333	35.8793	8.25049
XBXL10_1g1129	XBmRNA1770| gar1.L	25.56	1	1	9	35	226.924	1.00983e+09	4.4501e+06	8.96707e+08	3.95157e+06	0.887974	223	22.7412	10.7847
XBXL10_1g32459	XBmRNA61267| gapdh.S	33.03	1	4	10	41	3866.03	1075995137	278321	8.81942e+08	228126	0.819652	333	35.8122	8.04541
XBXL10_1g17638	XBmRNA32479| psma1.L	49.43	1	1	12	51	1314.68	2.87818e+08	218926	8.68385e+08	660529	3.01713	261	29.2667	6.53662
XBXL10_1g21051	XBmRNA38970| psma1.S	59.39	1	3	14	49	362.916	2.87818e+08	793070	8.68385e+08	2.3928e+06	3.01713	261	29.2987	6.44287
XBXL10_1g31142	XBmRNA58911| dlat.L	32.17	1	8	17	39	285.245	98426378	345059	8.6596e+08	3.03585e+06	8.79805	628	66.8212	8.82178
XBXL10_1g33365	XBmRNA62948| LOC108705521	25.95	1	6	15	32	691.81	5.06336e+07	73190	8.6596e+08	1.25173e+06	17.1025	632	67.2915	8.70459
XBXL10_1g25258	XBmRNA47145| psmb1.S	33.89	2	8	8	22	545.527	2.81831e+08	516622	8.3481e+08	1.53028e+06	2.96209	239	26.6184	7.44482
XBXL10_1g28137	XBmRNA52839| decr1.L	44.71	1	11	11	39	671.918	1.32853e+08	197721	8.21812e+08	1.22308e+06	6.1859	331	35.4752	8.73389
XBXL10_1g36589	XBmRNA69070| anp32e.L	43.94	1	8	12	43	474.736	0	0	7.98342e+08	1.68165e+06	>1000	264	30.1888	4.03076
XBXL10_1g6256	XBmRNA11742| atp5po.L	51.66	1	6	9	29	1997.68	1.2337e+08	61756.6	7.95387e+08	398156	6.44718	211	22.8454	9.83252
XBXL10_1g16335	XBmRNA30675| slc25a3.S	20	2	8	8	24	989.427	6.70839e+07	67800.7	7.41879e+08	749806	11.059	360	40.0025	9.24658
XBXL10_1g21101	XBmRNA39082| nap1l4.S	11.05	1	2	6	19	216.978	64320598	296438	7.30569e+08	3.36701e+06	11.3582	371	42.4227	4.76709
XBXL10_1g42523	XBmRNA79939| aurka.S	54.17	1	8	19	119	136.839	1.9947e+09	1.4577e+07	7.16264e+08	5.23435e+06	0.359083	408	46.4463	9.48096
XBXL10_1g39337	XBmRNA74138| aurka.L	49.14	1	9	20	116	90.0523	1.9947e+09	2.21505e+07	7.16264e+08	7.95387e+06	0.359083	407	46.3432	9.45166
XBXL10_1g35766	XBmRNA67559| psmc1.L	40.23	2	16	17	46	3.00028	1.86782e+08	6.22549e+07	7.05833e+08	2.35256e+08	3.77891	440	49.0957	6.354
XBXL10_1g12071	XBmRNA22521| hspa9.L	34.18	1	5	18	29	1614.09	5.26242e+08	326030	6.98411e+08	432696	1.32717	670	72.5152	5.92236
XBXL10_1g15213	XBmRNA28367| hspa9.S	32.09	1	5	18	29	720.405	5.26242e+08	730480	6.98411e+08	969469	1.32717	670	72.7943	5.84619
XBXL10_1g27834	XBmRNA52276| thoc1.L	62.99	5	45	45	264	100.61	2007665241	1.9955e+07	6.97092e+08	6.92867e+06	0.347215	670	76.497	4.97021
XBXL10_1g22418	XBmRNA41720| pdhb.S	42.5	1	6	9	19	1062.32	5.72581e+07	53899.2	6.96608e+08	655744	12.1661	360	39.0989	6.1001
XBXL10_1g18930	XBmRNA34882| got2.L	32.79	1	7	12	34	2194.9	1.0961e+08	49938.5	6.95676e+08	316951	6.34682	427	47.5543	8.83643
XBXL10_1g21455	XBmRNA39714| got2.S	39.58	1	8	13	29	1239.29	1.02107e+08	82391.6	694666781	560535	6.80331	427	47.6705	9.14404
XBXL10_1g9746	XBmRNA18233| psma5.S	19.43	1	1	4	17	1223.78	7.28113e+07	59497.1	6.9032e+08	564089	9.48095	247	26.9784	4.90674
XBXL10_1g37131	XBmRNA70032| psma6.S	43.5	2	10	10	29	440.509	1.3255e+08	300903	6.84791e+08	1.55455e+06	5.16628	246	27.3188	7.1958
XBXL10_1g40058	XBmRNA75341| atp5pd.L	43.48	1	2	7	18	1117.85	83004780	74253.8	6.8277e+08	610787	8.22567	161	18.7106	7.48877
XBXL10_1g36019	XBmRNA68117| psma3.L	30.98	1	1	9	31	1157.38	1.42132e+08	122805	6.77469e+08	585349	4.76649	255	28.346	5.09717
XBXL10_1g37199	XBmRNA70187| psma3.S	30.98	1	1	9	29	137.437	1.42132e+08	1.03416e+06	6.77469e+08	4.92932e+06	4.76649	255	28.392	5.04639
XBXL10_1g7079	XBmRNA13254| psma5.L	25.73	1	3	6	22	917.334	7.836e+07	85421.4	6.66599e+08	726669	8.50687	241	26.1791	4.91943
XBXL10_1g19995	XBmRNA36996| uqcrc1.L	46.23	1	19	19	46	1042.45	7.98263e+07	76575.7	6.56611e+08	629874	8.2255	478	52.3124	6.21436
XBXL10_1g43044	XBmRNA80908| atp5pd.S	43.48	1	2	7	20	2249.79	52304740	23248.7	6.51026e+08	289372	12.4468	161	18.6024	7.56201
XBXL10_1g41221	XBmRNA77781| uqcrc2.L	43.9	1	9	14	36	852.005	9.54139e+07	111988	6.49902e+08	762791	6.8114	451	47.8316	8.90967
XBXL10_1g40366	XBmRNA75895| rpl13a.L	10.82	3	3	3	5	2476.06	4.05124e+08	163616	6.48847e+08	262048	1.6016	231	26.418	11.1216
XBXL10_1g16089	XBmRNA30127| psmc2.S	47.58	2	21	21	59	115.328	1.46224e+08	1.26789e+06	6.42288e+08	5.56921e+06	4.39249	433	48.6191	5.79541
XBXL10_1g27417	XBmRNA51427| sdha.L	34.44	1	5	15	34	1075.79	4.33389e+07	40285.5	6.33657e+08	589013	14.621	665	72.8082	7.25439
XBXL10_1g29195	XBmRNA54877| sdha.S	31.88	1	4	14	32	557.733	4.33389e+07	77705.4	6.29915e+08	1.12942e+06	14.5346	665	72.724	6.96143
XBXL10_1g634	XBmRNA737| cgl.2.L	42.5	2	2	11	36	6265.64	1.75226e+08	27966.2	626168622	99936.8	3.57349	320	35.2598	5.24951
XBXL10_1g632	XBmRNA734| LOC121402019	40.94	2	1	10	31	2163.05	1.75226e+08	81009	626168622	289485	3.57349	320	35.1819	5.24951
XBXL10_1g6634	XBmRNA12439| pdha1.L	39.5	2	2	15	31	913.613	3.96646e+07	43415.1	6.1815e+08	676600	15.5844	400	44.5121	7.62061
XBXL10_1g21994	XBmRNA40867| mgst3.S	34.69	1	2	3	19	771.747	127824611	165630	6.03773e+08	782345	4.72344	147	16.3384	9.42236
XBXL10_1g21580	XBmRNA40015| psma4.S	40.23	1	1	9	27	682.011	8.31449e+07	121911	5.95901e+08	873742	7.16703	261	29.3941	7.32764
XBXL10_1g19088	XBmRNA35263| psma4.L	40.23	1	1	9	26	1169.73	8.31449e+07	71080.2	5.95901e+08	509434	7.16703	261	29.4092	7.72314
XBXL10_1g20770	XBmRNA38244| psmd13.S	61.11	1	21	21	61	810.66	1.51179e+08	186489	5.89921e+08	727704	3.90213	378	43.0352	5.89697
XBXL10_1g19682	XBmRNA36408| aco2.L	39.64	1	8	23	33	2474.51	1.9505e+07	7882.4	5.81627e+08	235048	29.8193	782	85.3856	7.10791
XBXL10_1g22041	XBmRNA40974| aco2.S	35.93	1	5	20	30	993.436	1.9505e+07	19633.9	5.81627e+08	585470	29.8193	782	85.2216	7.12256
XBXL10_1g10192	XBmRNA19060| eef1a1o.S	24.08	6	2	11	40	246.473	1.22076e+09	4.95291e+06	5.70773e+08	2.31576e+06	0.467555	461	50.1923	9.15869
XBXL10_1g7389	XBmRNA13922| eef1a1o.L	23.21	4	1	10	36	1817.12	1.22076e+09	671812	5.70773e+08	314109	0.467555	461	50.0913	9.17334
XBXL10_1g39228	XBmRNA73944| psmc5.L	33.73	3	11	12	44	1049.54	1.61105e+08	153501	570344656	543422	3.5402	415	46.4933	7.54736
XBXL10_1g26795	XBmRNA50092| rbm33.L	22.42	1	25	26	135	57.3585	1.76755e+09	3.08159e+07	5.6998e+08	9.93716e+06	0.322469	1307	146.276	7.06396
XBXL10_1g36041	XBmRNA68166| lgals3.L	39.08	2	10	10	37	1879.07	669657758	356377	5.6921e+08	302921	0.850002	261	28.3141	6.78564
XBXL10_1g37008	XBmRNA69801| psmb4.L	17.74	1	1	2	10	389.794	68796090	176494	5.5857e+08	1.43299e+06	8.11921	248	27.3436	5.84619
XBXL10_1g29125	XBmRNA54760| psma2.S	47.44	1	9	9	30	1409.41	8.18533e+07	58076.1	5.54895e+08	393706	6.77914	234	25.8182	6.80029
XBXL10_1g15404	XBmRNA28780| ppia.S	13.41	3	3	3	7	5366.99	1.97897e+08	36872.9	5.54014e+08	103226	2.79952	164	17.9008	8.35303
XBXL10_1g17838	XBmRNA32952| psmc3.L	40.9	2	12	12	32	1191.86	1.46374e+08	122811	5.51193e+08	462465	3.76565	423	47.3675	5.22412
XBXL10_1g8479	XBmRNA16046| acat1.L	33.81	1	3	11	29	1710.48	6.15368e+07	35976.2	5.50196e+08	321661	8.94094	420	44.1297	8.70459
XBXL10_1g11052	XBmRNA20802| acat1.S	28.1	1	2	10	27	331.217	6.15368e+07	185790	5.50196e+08	1.66113e+06	8.94094	420	44.0607	8.55811
XBXL10_1g30830	XBmRNA58194| ndufv1.L	50.74	1	18	18	41	805.103	7.53695e+07	93614.7	542429466	673739	7.19694	471	51.6761	8.1626
XBXL10_1g38399	XBmRNA72538| fbxo27.S	50.17	1	12	12	32	79.708	1.22086e+08	1.53167e+06	5.41557e+08	6.79426e+06	4.43586	295	34.5805	8.60205
XBXL10_1g43919	XBmRNA82642| uqcrc2.S	38.36	1	8	13	26	985.455	7.27606e+07	73834.5	5.38959e+08	546914	7.4073	451	47.9356	8.92432
XBXL10_1g39180	XBmRNA73863| psmd11.L	53.55	1	2	20	62	144.808	1.46791e+08	1.0137e+06	538338854	3.71762e+06	3.66738	422	47.3271	6.72705
XBXL10_1g42406	XBmRNA79680| psmd11.S	50.47	1	1	19	61	1065.42	1.46791e+08	137778	538338854	505285	3.66738	422	47.2642	7.37158
XBXL10_1g3659	XBmRNA6679| LOC121399267	30.99	3	3	8	20	869.766	1.687e+08	193960	536037737	616301	3.17746	313	34.2684	5.66846
XBXL10_1g9142	XBmRNA17028| atp5po.S	53.08	1	6	9	23	936.609	7.467e+07	79723.8	5.28695e+08	564478	7.08042	211	22.8755	9.84717
XBXL10_1g35068	XBmRNA66225| thoc2.L	47.17	1	16	69	391	54.831	1.69014e+09	3.08246e+07	5.27946e+08	9.6286e+06	0.312367	1588	181.863	8.48486
XBXL10_1g37925	XBmRNA71701| thoc2.S	39.75	1	8	61	336	74.5556	1.69014e+09	2.26696e+07	5.27946e+08	7.08123e+06	0.312367	1590	181.936	8.52881
XBXL10_1g2509	XBmRNA4364| thoc5.L	57.39	1	27	39	202	70.8047	1.66242e+09	2.3479e+07	5.2063e+08	7.35304e+06	0.313176	690	79.5557	7.13721
XBXL10_1g30675	XBmRNA57851| ccser2.L	30.2	1	20	27	65	4.06881	1.10351e+08	2.71213e+07	5.204e+08	1.279e+08	4.71585	1106	123.434	7.31299
XBXL10_1g7224	XBmRNA13570| psmb2.L	44.72	1	6	10	24	856.668	5.73385e+07	66932	5.12297e+08	598011	8.9346	199	22.5946	6.55127
XBXL10_1g40784	XBmRNA76817| ndufa10.L	30.62	1	4	10	22	830.889	6.9166e+07	83243.3	5.10465e+08	614360	7.38029	405	46.0496	8.42627
XBXL10_1g43575	XBmRNA81998| ndufa10.S	37.04	1	4	10	26	579.609	6.31208e+07	108902	5.10465e+08	880706	8.08711	351	40.0301	6.69775
XBXL10_1g38838	XBmRNA73284| psmb4.S	17.67	1	1	2	8	820.302	68796090	83866.8	5.10181e+08	621944	7.41585	249	27.4527	5.90967
XBXL10_1g17297	XBmRNA32015| aurkb.S	30.43	1	4	9	20	50.6145	1168749306	2.30912e+07	504739376	9.97223e+06	0.431863	368	42.0517	9.49561
XBXL10_1g14381	XBmRNA27095| aurkb.L	39.06	1	9	14	37	141.171	4.27155e+08	3.02581e+06	504739376	3.57539e+06	1.18163	361	41.7085	9.46631
XBXL10_1g38384	XBmRNA72511| psmd8.S	38.83	2	11	11	27	696.883	107991902	154964	504569218	724037	4.67229	309	35.3122	7.57666
XBXL10_1g38850	XBmRNA73319| psmd4.S	31.12	2	9	9	24	197.157	7.48613e+07	379705	5.04536e+08	2.55906e+06	6.73961	376	40.5391	4.80518
XBXL10_1g41602	XBmRNA78425| thoc6.L	55.56	1	16	16	111	101.555	1.35646e+09	1.33568e+07	4.92394e+08	4.84853e+06	0.363	333	37.1081	6.3667
XBXL10_1g18741	XBmRNA34549| psmd7.L	55.94	2	12	12	41	947.073	8.97629e+07	94779.2	4.80647e+08	507507	5.35463	320	36.5832	6.68311
XBXL10_1g37297	XBmRNA70402| psmc6.S	34.45	2	16	16	45	32.0447	1.45561e+08	4.54243e+06	4.80041e+08	1.49804e+07	3.29788	389	44.1201	7.48877
XBXL10_1g32924	XBmRNA62197| ccser2.S	34.27	1	26	33	110	2.85082	1.42742e+08	5.00706e+07	4.74554e+08	1.66462e+08	3.32455	1100	122.971	8.23584
XBXL10_1g4456	XBmRNA8288| XB5727280.S	38.37	1	4	7	17	1889.28	5.85571e+07	30994.4	4.43618e+08	234808	7.57582	245	27.1935	5.03369
XBXL10_1g25820	XBmRNA48288| actl6a.S	32.63	2	1	12	27	118.355	0	0	4.40431e+08	3.72128e+06	>1000	429	47.5934	5.60498
XBXL10_1g17459	XBmRNA32201| slc25a11.S	40.98	2	12	12	40	147.114	1.36718e+08	929333	4.40081e+08	2.99143e+06	3.2189	305	33.5873	9.90576
XBXL10_1g31100	XBmRNA58842| sidt2.L	0.82	1	1	1	3	#N/A	4.60414e+08	#N/A	437132962	#N/A	#N/A	858	97.3844	7.59131
XBXL10_1g18988	XBmRNA35012| vtga2.L	32.37	1	39	50	182	711.54	7.01797e+08	986308	4.37004e+08	614167	0.622693	1807	201.418	9.0415
XBXL10_1g5135	XBmRNA9545| thoc5.S	46.96	1	14	26	133	12.9724	1.25152e+09	9.64756e+07	4.30619e+08	3.31949e+07	0.344076	690	79.2182	6.55127
XBXL10_1g38419	XBmRNA72569| LOC108700297	5.56	1	1	1	4	1013.05	0	0	4.28844e+08	423321	>1000	144	16.4383	7.10791
XBXL10_1g25673	XBmRNA47991| psmd2.S	37.12	1	3	29	87	203.833	1.11739e+08	548189	4.26112e+08	2.0905e+06	3.81346	897	99.2542	5.23682
XBXL10_1g23784	XBmRNA44430| psmd2.L	37.12	1	4	30	84	626.206	1.11739e+08	178438	4.26112e+08	680467	3.81346	897	99.2734	5.26221
XBXL10_1g24836	XBmRNA46352| hsp90ab1.S	33.1	3	5	23	69	2515.61	3.99362e+08	158754	4.19588e+08	166794	1.05065	728	83.6754	5.07178
XBXL10_1g22805	XBmRNA42481| LOC108716102	26.9	3	2	20	60	826.676	3.99362e+08	483093	4.19588e+08	507561	1.05065	725	83.4132	5.03369
XBXL10_1g17847	XBmRNA32967| ndufs3.L	38	2	11	11	19	1030.87	5.31384e+07	51547.2	4.13628e+08	401242	7.78398	250	28.6487	6.41748
XBXL10_1g27788	XBmRNA52159| ndufv2.L	31.28	1	6	6	11	944.18	0	0	412115822	436480	>1000	243	26.5783	6.29053
XBXL10_1g30835	XBmRNA58204| ndufs8.L	26.57	1	5	5	13	599.648	4.13379e+07	68936.8	4.11493e+08	686224	9.95439	207	23.4456	6.34131
XBXL10_1g28655	XBmRNA53832| ndufb10.S	34.48	1	1	5	11	1028.22	5.98942e+07	58250.5	4.07186e+08	396011	6.79842	174	20.5891	8.47021
XBXL10_1g25700	XBmRNA48030| psmd1.S	30.6	2	2	22	49	156.322	9.54932e+07	610876	402425574	2.57434e+06	4.21418	951	105.391	5.33838
XBXL10_1g23825	XBmRNA44512| psmd1.L	28.92	2	1	21	48	674.237	9.54932e+07	141632	402425574	596861	4.21418	951	105.346	5.31299
XBXL10_1g1629	XBmRNA2898| XB5727280.L	28.1	1	2	5	12	548.568	5.85571e+07	106745	4.02099e+08	732998	6.86679	242	26.9975	5.2749
XBXL10_1g38981	XBmRNA73555| psmd3.L	35.83	2	22	22	57	701.986	9.46662e+07	134855	400594129	570658	4.23165	547	62.8778	9.26123
XBXL10_1g20138	XBmRNA37343| pdhb.L	33.06	1	5	8	12	364.706	0	0	3.96041e+08	1.08592e+06	>1000	360	39.1208	5.70654
XBXL10_1g11376	XBmRNA21378| cyb5r3.L	33.55	2	8	8	19	1507.61	5.18516e+07	34393.3	3.95348e+08	262236	7.62462	301	34.3508	8.79248
XBXL10_1g30765	XBmRNA58022| ndufa13.L	22.92	1	4	4	7	1029.24	124281886	120752	3.927e+08	381545	3.15975	144	16.9638	9.72998
XBXL10_1g43460	XBmRNA81771| psmd14.S	8.71	1	3	3	9	686.139	89154236	129936	389037298	566995	4.36364	310	34.5446	6.45557
XBXL10_1g14707	XBmRNA27481| psmb6.L	36.91	1	3	6	20	415.839	5.241e+07	126034	387428564	931679	7.39226	233	24.8102	5.87158
XBXL10_1g22793	XBmRNA42469| LOC108705669	29.45	17	2	8	37	#N/A	8.81707e+08	#N/A	3.8644e+08	#N/A	#N/A	326	36.2833	11.4146
XBXL10_1g43221	XBmRNA81241| psmd12.S	28.12	1	5	12	35	704.6	1.09959e+08	156058	3.86328e+08	548294	3.51339	441	51.3956	6.40479
XBXL10_1g40325	XBmRNA75800| psmd12.L	26.53	1	4	11	29	255.853	1.09959e+08	429772	3.86328e+08	1.50996e+06	3.51339	441	51.5558	6.40479
XBXL10_1g19023	XBmRNA35097| acadm.L	36.64	1	2	13	19	2048.12	3.92859e+07	19181.4	375483004	183330	9.55771	423	46.2406	8.57275
XBXL10_1g21528	XBmRNA39889| acadm.S	35.31	1	2	13	19	155.186	3.92859e+07	253154	375483004	2.41957e+06	9.55771	422	46.1984	8.33838
XBXL10_1g33927	XBmRNA64008| fbl.S	55.73	1	3	17	67	22.8703	628533542	2.74825e+07	3.74641e+08	1.63811e+07	0.596055	323	34.3288	10.1694
XBXL10_1g19188	XBmRNA35464| dmap1.L	36.85	1	20	20	58	70.7635	0	0	3.70731e+08	5.23901e+06	>1000	464	53.1386	9.40771
XBXL10_1g4394	XBmRNA8176| atp5f1d.S	38.89	2	3	3	6	1319.97	30480039	23091.4	3.65862e+08	277174	12.0033	162	16.8718	4.91943
XBXL10_1g26676	XBmRNA49846| LOC108718674	47.4	1	3	7	13	331.985	4.18982e+07	126205	3.64963e+08	1.09934e+06	8.71071	173	20.291	8.47021
XBXL10_1g32160	XBmRNA60583| psmc4.L	46.19	3	18	19	53	140.448	78189866	556718	3.62202e+08	2.57891e+06	4.63234	420	47.3776	5.16064
XBXL10_1g11993	XBmRNA22380| ndufa9.L	37.4	1	11	11	35	927.897	5.03214e+07	54231.7	3.61821e+08	389937	7.19021	377	42.8575	9.45166
XBXL10_1g18990	XBmRNA35014| vtgb1.L	26.8	1	23	43	126	1194.85	6.01621e+08	503512	361207111	302304	0.60039	1817	202.99	8.93896
XBXL10_1g23966	XBmRNA44825| LOC108717002	32.63	2	1	12	25	208.693	0	0	3.54013e+08	1.69634e+06	>1000	429	47.5484	5.50342
XBXL10_1g9257	XBmRNA17295| ndufb4.S	39.72	1	1	4	10	536.778	47845998	89135.6	3.5349e+08	658541	7.38809	141	16.5855	8.89502
XBXL10_1g10042	XBmRNA18769| psmb2.S	25.63	1	1	5	14	149.654	54976769	367358	3.47852e+08	2.32437e+06	6.32725	199	22.6245	6.39209
XBXL10_1g3335	XBmRNA6078| acaa2.L	29.97	2	9	9	12	1392.53	0	0	3.46408e+08	248762	>1000	397	41.8797	7.75244
XBXL10_1g26960	XBmRNA50500| slc25a13.L	36.39	2	7	21	48	221.56	7.39177e+07	333624	3.46199e+08	1.56255e+06	4.68357	676	74.5988	8.6167
XBXL10_1g28890	XBmRNA54346| slc25a13.S	26.92	1	2	16	37	494.73	7.39177e+07	149410	3.46199e+08	699773	4.68357	676	74.6939	8.70459
XBXL10_1g42261	XBmRNA79438| psmb3.S	26.34	1	1	6	24	977.147	5.63327e+07	57650.1	3.40703e+08	348671	6.04805	205	23.0264	5.16064
XBXL10_1g18989	XBmRNA35013| LOC108714181	24.61	1	31	42	104	1537.11	5.44371e+08	354152	3.40366e+08	221432	0.625246	1816	202.22	9.1001
XBXL10_1g21498	XBmRNA39801| vtgb1.S	18.33	1	11	30	75	387.718	5.51394e+08	1.42215e+06	3.39955e+08	876810	0.616537	1800	200.802	8.90967
XBXL10_1g7565	XBmRNA14212| nipsnap2.L	30.14	2	6	7	15	475.111	0	0	3.38877e+08	713258	>1000	282	33.0557	8.93896
XBXL10_1g32116	XBmRNA60512| fbl.L	54.85	1	4	18	72	196.092	628533542	3.20529e+06	3.38175e+08	1.72457e+06	0.538038	330	34.741	10.2427
XBXL10_1g33926	XBmRNA64007| ndufa4.S	40.24	1	2	4	15	348.985	1.25914e+08	360800	3.315e+08	949896	2.63275	82	9.62093	9.84717
XBXL10_1g34745	XBmRNA65682| aifm1.L	27.32	2	16	16	34	768.386	2.39992e+07	31233.3	3.28579e+08	427622	13.6912	637	69.78	7.43018
XBXL10_1g32115	XBmRNA60511| ndufa4.L	30.49	1	2	4	15	1213.07	1.31054e+08	108035	3.24074e+08	267152	2.47283	82	9.63895	9.78857
XBXL10_1g6073	XBmRNA11337| ndufb4.L	43.75	1	1	4	9	912.317	0	0	3.23332e+08	354408	>1000	128	15.16	9.979
XBXL10_1g28288	XBmRNA53127| ndufb9.L	51.72	2	7	7	15	549.214	0	0	3.23087e+08	588270	>1000	174	21.2177	8.93896
XBXL10_1g12355	XBmRNA23085| thoc3.L	62.07	1	17	17	94	71.694	1.01679e+09	1.41824e+07	3.22845e+08	4.5031e+06	0.317513	319	35.8714	5.8208
XBXL10_1g33325	XBmRNA62877| LOC108697599	41.12	1	1	4	12	1084.42	6.87121e+07	63363	3.21353e+08	296336	4.6768	107	11.6343	9.75928
XBXL10_1g31079	XBmRNA58792| atp5mg.L	41.12	2	1	4	14	86.0874	6.00091e+07	697072	3.21353e+08	3.73287e+06	5.35507	107	11.6913	9.92041
XBXL10_1g39032	XBmRNA73619| psmb3.L	26.34	1	1	6	22	173.723	5.39914e+07	310791	3.18734e+08	1.83473e+06	5.90343	205	23.0144	5.16064
XBXL10_1g22360	XBmRNA41610| psmd6.S	26.99	1	4	11	23	570.188	8.44584e+07	148124	3.16738e+08	555498	3.75023	389	45.5584	5.99854
XBXL10_1g20104	XBmRNA37249| psmd6.L	27.51	1	3	10	22	405.139	8.44584e+07	208468	3.16738e+08	781801	3.75023	389	45.6763	5.50342
XBXL10_1g12759	XBmRNA24041| dld.L	30.31	1	5	12	19	507.503	0	0	3.12567e+08	615892	>1000	508	54.174	7.48877
XBXL10_1g38768	XBmRNA73133| ndufs2.S	25.71	1	4	11	18	643.957	0	0	310090319	481539	>1000	459	52.2813	6.7124
XBXL10_1g20542	XBmRNA37785| LOC108715122	31.27	2	11	28	42	1167.31	3.40449e+07	29165.2	3.09826e+08	265419	9.10051	1177	130.396	6.78564
XBXL10_1g34044	XBmRNA64187| sdhb.S	19.51	2	6	6	11	1010.35	0	0	3.07871e+08	304718	>1000	287	32.3011	8.60205
XBXL10_1g30076	XBmRNA56625| prdx3.L	20.32	1	2	5	8	569.179	22227298	39051.5	3.07583e+08	540397	13.8381	251	27.4102	8.25049
XBXL10_1g32408	XBmRNA61138| prdx3.S	14.74	1	1	4	7	1542.89	22227298	14406.2	3.07583e+08	199354	13.8381	251	27.473	7.75244
XBXL10_1g18455	XBmRNA33912| pc.1.L	22.18	1	5	22	32	258.019	3.40449e+07	131947	3.06055e+08	1.18617e+06	8.98974	1177	130.011	6.93213
XBXL10_1g43737	XBmRNA82334| atp5mf.S	33.71	1	3	3	7	1902.64	135910508	71432.4	3.04446e+08	160012	2.24005	89	10.2484	9.87646
XBXL10_1g2863	XBmRNA5107| aldh2.L	32.63	8	15	15	21	1720.15	1.52404e+07	8859.91	2.97821e+08	173137	19.5416	521	57.2133	7.6499
XBXL10_1g36929	XBmRNA69630| ndufs2.L	26.8	1	4	11	17	395.739	0	0	2.96777e+08	749930	>1000	459	52.2424	6.84424
XBXL10_1g582	XBmRNA626| immt.L	45.95	2	16	27	47	597.868	41341775	69148.7	292041094	488471	7.06407	766	85.0412	5.99854
XBXL10_1g2239	XBmRNA4134| psmb5.L	26.46	3	3	7	16	1012.88	5.54149e+07	54710	2.90099e+08	286409	5.23504	257	28.256	6.53662
XBXL10_1g41491	XBmRNA78297| srcap.L	14.3	2	21	39	87	18.8083	0	0	2.89898e+08	1.54133e+07	>1000	3196	344.156	6.59521
XBXL10_1g32681	XBmRNA61704| pgam1.S	4.33	1	1	1	9	1945.03	2.59933e+08	133640	2.88661e+08	148410	1.11052	254	28.7767	6.55127
XBXL10_1g22455	XBmRNA41812| acad9.S	35.37	1	20	20	39	1031.68	7.76747e+07	75289.3	2.88382e+08	279525	3.71268	622	68.3161	7.31299
XBXL10_1g31212	XBmRNA59042| eno1.L	51.84	4	16	17	56	7931.73	2.79215e+08	35202.3	2.83523e+08	35745.4	1.01543	434	47.3422	6.12549
XBXL10_1g28523	XBmRNA53582| btn2a1.S	2.58	1	1	1	1	#N/A	0	#N/A	2.82026e+08	#N/A	#N/A	465	52.6816	6.06201
XBXL10_1g17467	XBmRNA32222| psmb6.S	30.89	1	2	5	12	874.198	6.52206e+07	74606.2	2.79713e+08	319966	4.28873	246	26.287	6.27783
XBXL10_1g12445	XBmRNA23279| hsp90b1.L	9.81	2	7	8	14	1904.97	188266854	98829.5	277335804	145586	1.4731	805	92.6505	4.81787
XBXL10_1g17849	XBmRNA32971| mtch2.L	38.05	3	9	9	12	500.118	0	0	2.74371e+08	548612	>1000	297	32.7198	8.67529
XBXL10_1g15196	XBmRNA28323| skp1.S	46.37	2	9	9	27	#N/A	6.3839e+07	#N/A	2.74197e+08	#N/A	#N/A	179	20.5441	4.56396
XBXL10_1g16113	XBmRNA30178| dld.S	22.99	1	3	10	16	856.28	0	0	273363616	319246	>1000	509	54.2439	7.53271
XBXL10_1g43958	XBmRNA82698| nme3.S	4.14	3	1	1	1	#N/A	0	#N/A	272280866	#N/A	#N/A	169	19.402	8.17725
XBXL10_1g19480	XBmRNA36008| dbt.L	23.37	1	3	8	11	115.65	0	0	2.72158e+08	2.3533e+06	>1000	492	53.7214	8.96826
XBXL10_1g4388	XBmRNA8168| ndufs7.S	5.03	2	1	1	2	25.5282	0	0	271959012	1.06533e+07	>1000	179	20.3213	9.62744
XBXL10_1g38629	XBmRNA72900| anp32e.S	44.87	1	5	9	25	181.961	0	0	2.71712e+08	1.49324e+06	>1000	263	30.0279	4.05615
XBXL10_1g28460	XBmRNA53496| LOC108719501	2.56	71	2	2	4	#N/A	1.97091e+08	#N/A	270157488	#N/A	#N/A	1330	147.718	6.15088
XBXL10_1g21873	XBmRNA40605| dbt.S	15.45	1	1	6	8	296.397	0	0	2.69774e+08	910176	>1000	492	53.5752	8.88037
XBXL10_1g19624	XBmRNA36307| uchl5.L	37.39	2	9	9	19	716.642	5.94648e+07	82977	2.69193e+08	375631	4.52693	329	37.7741	5.51611
XBXL10_1g29695	XBmRNA55891| cox6c.S	22.78	1	1	2	8	1579.23	7.03357e+07	44538.1	268010163	169710	3.81044	79	8.85664	9.93506
XBXL10_1g11344	XBmRNA21299| pde3a.L	2.19	1	1	1	1	#N/A	0	#N/A	267283703	#N/A	#N/A	869	96.6991	5.26221
XBXL10_1g3621	XBmRNA6616| immt.S	16.75	2	2	13	19	490.789	2.45052e+07	49930.1	2.65984e+08	541951	10.8542	770	85.5767	6.66846
XBXL10_1g6511	XBmRNA12203| aldoc.L	10.99	2	3	4	8	2543.16	2.00655e+08	78900	2.63947e+08	103787	1.31543	364	39.2479	6.53662
XBXL10_1g41109	XBmRNA77581| LOC108701542	1.23	1	1	1	2	#N/A	42888588	#N/A	262498228	#N/A	#N/A	486	55.4161	8.90967
XBXL10_1g41890	XBmRNA78850| nme2.L	43.51	4	7	7	12	4105.85	1.03124e+08	25116.3	257437694	62700.2	2.4964	154	17.4778	6.56592
XBXL10_1g12462	XBmRNA23309| actr6.L	36.87	1	10	10	22	42.3762	0	0	2.51726e+08	5.94027e+06	>1000	396	45.4856	5.07178
XBXL10_1g28396	XBmRNA53350| cyc1.L	28.8	2	5	5	13	#N/A	5.39936e+07	#N/A	2.51536e+08	#N/A	#N/A	309	34.1003	8.5874
XBXL10_1g2661	XBmRNA4664| snrpd3.L	31.75	2	3	3	8	188.784	2.91729e+08	1.54531e+06	2.49454e+08	1.32137e+06	0.855087	126	13.9073	10.3159
XBXL10_1g16020	XBmRNA29960| chchd3.S	29.27	1	3	7	8	470.128	0	0	2.4863e+08	528856	>1000	246	28.0434	8.5874
XBXL10_1g41405	XBmRNA78136| thdl20.L	0.14	1	1	1	1	#N/A	0	#N/A	246384896	#N/A	#N/A	5117	576.843	4.71631
XBXL10_1g3223	XBmRNA5836| nnt.L	12.62	3	14	14	19	911.148	3.44613e+07	37821.8	2.454e+08	269331	7.12105	1086	113.927	7.06396
XBXL10_1g12975	XBmRNA24559| idh3a.L	20.42	2	6	6	7	1325.88	0	0	2.44793e+08	184627	>1000	382	41.8192	7.03467
XBXL10_1g19591	XBmRNA36256| ndufa6.L	12.6	2	1	1	2	916.949	0	0	2.44721e+08	266886	>1000	127	14.6617	9.78857
XBXL10_1g20107	XBmRNA37257| LOC108714731	52.25	1	5	12	63	99.933	6.42298e+08	6.42729e+06	2.44471e+08	2.44635e+06	0.380619	222	25.6219	6.04932
XBXL10_1g5004	XBmRNA9364| psmb5.S	21.4	2	2	6	10	201.858	5.80202e+07	287430	2.41903e+08	1.19838e+06	4.16928	257	28.285	6.78564
XBXL10_1g36808	XBmRNA69432| vps72.L	21.69	1	6	8	19	12.7386	0	0	2.41523e+08	1.89598e+07	>1000	355	40.9006	7.56201
XBXL10_1g16255	XBmRNA30518| yeats4.S	28.63	3	6	6	21	33.0048	0	0	2.3999e+08	7.27135e+06	>1000	234	27.2932	8.96826
XBXL10_1g35704	XBmRNA67402| dlst.L	12.14	1	1	5	6	381.93	0	0	238198170	623670	>1000	453	48.7674	8.57275
XBXL10_1g37413	XBmRNA70615| dlst.S	12.17	1	1	5	6	98.3498	0	0	238198170	2.42195e+06	>1000	452	48.9696	8.66064
XBXL10_1g3412	XBmRNA6234| stoml2.L	18.21	1	2	5	9	1068.12	6.24504e+07	58467.6	237667463	222510	3.8057	346	38.1647	6.40479
XBXL10_1g5922	XBmRNA11100| stoml2.S	14.72	1	1	4	8	293.916	6.24504e+07	212477	2.35609e+08	801622	3.77274	326	36.12	7.92822
XBXL10_1g16292	XBmRNA30598| ndufa12.S	25.69	1	3	3	4	1039.99	0	0	2.35535e+08	226477	>1000	144	17.2556	9.33447
XBXL10_1g27295	XBmRNA51132| cul1.L	29.12	6	21	21	42	#N/A	5.92154e+07	#N/A	2.33475e+08	#N/A	#N/A	776	89.664	8.00146
XBXL10_1g1104	XBmRNA1724| hadh.L	15.65	1	4	4	7	1641.65	1.85309e+07	11288	2.32313e+08	141512	12.5365	313	34.2918	8.55811
XBXL10_1g22362	XBmRNA41614| thoc7.S	57.71	1	5	12	58	50.8987	5.89261e+08	1.15771e+07	2.29722e+08	4.51331e+06	0.389847	201	23.3568	5.68115
XBXL10_1g28735	XBmRNA54006| dnajb6.S	21.3	1	2	6	16	#N/A	2.11049e+08	#N/A	2.29658e+08	#N/A	#N/A	338	37.148	7.54736
XBXL10_1g32956	XBmRNA62263| glud1.S	27.59	2	13	13	28	928.327	47680596	51361.9	2.2924e+08	246938	4.80782	540	59.5104	7.95752
XBXL10_1g29958	XBmRNA56422| LOC108695985	4.12	7	1	1	3	#N/A	152923768	#N/A	2.23571e+08	#N/A	#N/A	243	25.9248	5.88428
XBXL10_1g40966	XBmRNA77284| hibch.L	3.12	1	1	1	1	532.206	0	0	223554561	420053	>1000	385	42.3277	7.97217
XBXL10_1g10968	XBmRNA20633| katnal1.S	2.47	3	1	1	2	#N/A	0	#N/A	221318562	#N/A	#N/A	486	54.7552	6.63916
XBXL10_1g25203	XBmRNA47048| sod2.S	16.07	1	2	3	4	1274.37	0	0	2.19299e+08	172085	>1000	224	25.0786	8.07471
XBXL10_1g28732	XBmRNA54000| shh.S	2.1	2	1	1	1	#N/A	0	#N/A	217171734	#N/A	#N/A	429	47.3131	7.28369
XBXL10_1g34672	XBmRNA65540| ndufa8.L	23.26	2	3	3	4	709.628	0	0	2.15547e+08	303746	>1000	172	19.8979	7.63525
XBXL10_1g30123	XBmRNA56694| tpi1.L	33.47	2	3	8	16	3348.74	1.31739e+08	39340	2.15355e+08	64309.2	1.6347	248	26.8629	7.00537
XBXL10_1g38691	XBmRNA73011| vps72.S	20.6	1	5	7	14	17.8863	0	0	213346256	1.19279e+07	>1000	364	41.4786	6.41748
XBXL10_1g35387	XBmRNA66801| rack1.L	19.56	1	6	6	14	2129.61	68676868	32248.6	2.12097e+08	99594.5	3.08833	317	35.0465	7.69385
XBXL10_1g42077	XBmRNA79110| LOC108703919	2	2	1	1	2	#N/A	0	#N/A	212067824	#N/A	#N/A	550	63.1964	4.97021
XBXL10_1g42544	XBmRNA79979| adrm1.S	8.91	2	4	4	9	528.088	6.5375e+07	123796	2.11224e+08	399980	3.23096	404	42.1287	4.91943
XBXL10_1g9242	XBmRNA17260| LOC108709281	18.13	2	3	3	6	763.599	4.83799e+07	63357.8	2.10565e+08	275753	4.35232	160	17.8424	9.64209
XBXL10_1g9852	XBmRNA18417| dynll2.S	33.71	2	1	4	15	551.11	6.97282e+07	126523	2.09325e+08	379824	3.00201	89	10.3431	7.37158
XBXL10_1g1993	XBmRNA3554| rad23b.L	14.8	1	1	6	16	472.36	3.09535e+07	65529.5	2.09254e+08	442998	6.76028	419	44.9407	4.62744
XBXL10_1g4767	XBmRNA8859| rad23b.S	15.05	1	1	6	16	202.966	3.09535e+07	152506	2.09254e+08	1.03098e+06	6.76028	412	43.818	4.53857
XBXL10_1g44096	XBmRNA82957| srcap.S	10.16	2	9	27	55	2.16736	0	0	2.06861e+08	9.54439e+07	>1000	3110	335.548	6.88818
XBXL10_1g15898	XBmRNA29681| cox5a.S	44.59	1	6	6	10	#N/A	0	#N/A	2.05615e+08	#N/A	#N/A	148	16.4665	7.29834
XBXL10_1g4592	XBmRNA8507| hsdl2.S	13.43	1	5	5	8	1779.46	46399762	26075.1	1.99862e+08	112316	4.3074	417	44.5307	7.38623
XBXL10_1g2623	XBmRNA4583| cox6a1.L	26.13	2	2	2	4	1628.85	54698113	33580.8	1.99859e+08	122700	3.65386	111	12.3474	9.24658
XBXL10_1g17827	XBmRNA32879| LOC108713455	1.35	1	1	1	3	#N/A	216393557	#N/A	1.98034e+08	#N/A	#N/A	519	59.174	8.54346
XBXL10_1g711	XBmRNA925| lap3.L	16.15	1	7	7	9	1797.45	2.00166e+08	111361	1.95923e+08	109001	0.978802	520	56.1876	7.73779
XBXL10_1g10180	XBmRNA19018| ak2.S	18.67	4	5	5	7	681.129	1.3005e+08	190933	1.95761e+08	287406	1.50527	241	26.4776	6.63916
XBXL10_1g42893	XBmRNA80611| snrpb.S	9.75	2	1	4	13	196.79	4.13798e+08	2.10274e+06	1.95543e+08	993666	0.472557	236	24.1154	11.2095
XBXL10_1g41026	XBmRNA77406| MGC82602	49.3	6	7	7	22	5879.57	252298374	42911	1.90787e+08	32449.1	0.756195	142	15.6541	5.78271
XBXL10_1g40997	XBmRNA77338| kpna7.L	31.17	1	1	9	36	987.457	180387087	182678	1.90133e+08	192548	1.05403	523	57.7721	5.33838
XBXL10_1g44430	XBmRNA83487| LOC108704215	32.08	1	11	11	17	1025.96	321971605	313826	1.88871e+08	184093	0.586607	452	49.6823	6.80029
XBXL10_1g30200	XBmRNA56837| cisd1.L	32.04	2	4	4	9	1994.94	0	0	1.88268e+08	94372.7	>1000	103	11.4066	8.35303
XBXL10_1g35694	XBmRNA67379| aldh6a1.L	27.53	1	5	11	15	543.065	0	0	1.84817e+08	340322	>1000	523	56.6829	7.48877
XBXL10_1g39861	XBmRNA74981| snrpb.L	9.83	2	1	4	15	15.9527	4.13798e+08	2.59391e+07	1.84619e+08	1.15729e+07	0.446157	234	23.9473	11.2095
XBXL10_1g42781	XBmRNA80429| alyref.S	29.3	2	5	5	24	195.69	4.15065e+08	2.12104e+06	1.84422e+08	942420	0.44432	256	27.1589	11.1362
XBXL10_1g5853	XBmRNA10959| me2.S	15.9	3	9	9	13	1059.33	2.45057e+07	23133.3	1.84042e+08	173735	7.51018	654	72.9656	6.97607
XBXL10_1g2507	XBmRNA4362| nipsnap1.L	31.18	3	9	10	24	#N/A	71378103	#N/A	183737227	#N/A	#N/A	279	33.0318	9.24658
XBXL10_1g12870	XBmRNA24320| chchd3.L	17.53	1	1	5	6	350.123	0	0	1.82104e+08	520113	>1000	251	28.6247	8.5874
XBXL10_1g26806	XBmRNA50107| dnajb6.L	16.43	1	1	5	14	83.4949	1.84079e+08	2.20467e+06	1.81182e+08	2.16998e+06	0.984262	347	37.9633	7.57666
XBXL10_1g12063	XBmRNA22505| sqstm1.L	19.38	1	6	6	8	17.8369	0	0	1.78853e+08	1.00272e+07	>1000	454	50.0371	5.43994
XBXL10_1g18023	XBmRNA33271| muc6.L	2.72	1	18	18	28	19.2649	7.6633e+07	3.97786e+06	176620849	9.16802e+06	2.30476	6906	702.98	8.1626
XBXL10_1g4971	XBmRNA9302| pck2.S	10.89	2	6	6	6	1160.56	0	0	1.75717e+08	151407	>1000	643	70.9116	8.11865
XBXL10_1g3308	XBmRNA6016| fech.L	19.14	2	7	7	11	440.413	0	0	1.74683e+08	396635	>1000	418	46.8191	9.15869
XBXL10_1g14242	XBmRNA26868| prdx2.L	43.07	5	8	8	16	2582.83	121192902	46922.6	1.7217e+08	66659.6	1.42063	202	22.4126	7.00537
XBXL10_1g8113	XBmRNA15347| shmt2.L	26.41	2	10	10	11	514.345	7.51097e+06	14603	1.71598e+08	333623	22.8463	496	54.8872	8.5874
XBXL10_1g43735	XBmRNA82329| kpna7.S	35.44	1	2	10	37	866.952	1.61407e+08	186178	1.70942e+08	197176	1.05908	522	57.652	5.41455
XBXL10_1g2628	XBmRNA4589| dynll1.L	33.71	2	1	4	12	246.453	5.0415e+07	204562	168451243	683502	3.34129	89	10.3512	7.37158
XBXL10_1g29646	XBmRNA55810| MGC82636	20	2	3	3	6	4640.47	1.05269e+08	22685	165348214	35631.8	1.57072	135	15.2818	6.18896
XBXL10_1g3210	XBmRNA5815| ndufs4.L	20.71	2	4	4	4	919.801	0	0	1.64874e+08	179250	>1000	169	19.1797	9.93506
XBXL10_1g3235	XBmRNA5857| oxct1.L	7.17	2	2	2	2	1007.15	0	0	1.63055e+08	161897	>1000	530	57.4136	7.10791
XBXL10_1g4392	XBmRNA8173| cirbp.S	37.95	1	4	5	19	4137.66	5.73672e+08	138647	1.62397e+08	39248.4	0.283083	166	17.8443	9.12939
XBXL10_1g9246	XBmRNA17266| MGC81152	1.04	1	1	1	5	3.21163	1.97741e+08	6.15704e+07	160953136	5.01157e+07	0.813958	671	76.7436	5.5542
XBXL10_1g32119	XBmRNA60519| cox6b1.L	43.02	2	4	4	7	1663.46	1.84828e+07	11111	1.60674e+08	96589.8	8.69314	86	10.45	8.70459
XBXL10_1g1941	XBmRNA3453| ndufb6.L	12.6	1	2	2	4	634.392	0	0	1.60347e+08	252757	>1000	127	14.954	9.77393
XBXL10_1g28180	XBmRNA52916| LOC108719345	11.69	1	1	2	5	669.553	5.70478e+07	85202.9	160230188	239309	2.8087	154	17.1718	9.68604
XBXL10_1g19580	XBmRNA36241| rpsa.L	30.72	2	7	7	18	17.1742	2.00876e+08	1.16964e+07	1.58234e+08	9.21351e+06	0.787721	306	34.037	4.90674
XBXL10_1g1810	XBmRNA3220| grhpr.2.L	52.55	2	11	11	37	4108.4	2.35933e+08	57427	1.58147e+08	38493.7	0.670306	333	36.0269	6.17627
XBXL10_1g30644	XBmRNA57755| camk2g.L	38.69	1	2	19	62	230.453	147553290	640275	156608732	679570	1.06137	654	72.6818	7.07861
XBXL10_1g32894	XBmRNA62115| camk2g.S	40	3	2	19	62	226.977	147553290	650080	156608732	689976	1.06137	655	72.7548	6.91748
XBXL10_1g41333	XBmRNA78003| eci1.L	16.44	1	4	4	5	1463.67	0	0	1.53096e+08	104598	>1000	298	33.1858	8.74854
XBXL10_1g14987	XBmRNA27895| samm50.S	19.44	2	8	8	8	132.733	0	0	1.52824e+08	1.15136e+06	>1000	468	52.0364	6.69775
XBXL10_1g34175	XBmRNA64463| tubb4b.L	33.03	12	1	11	34	903.954	5.33637e+08	590337	152098528	168259	0.285022	445	49.784	4.89404
XBXL10_1g37468	XBmRNA70732| tubb4b.S	33.03	12	1	11	31	2873.61	5.33637e+08	185703	152098528	52929.5	0.285022	445	49.7769	4.85596
XBXL10_1g15098	XBmRNA28155| ldhb.S	30.24	2	10	10	14	5522.49	1.63539e+08	29613.2	1.51488e+08	27431.1	0.926315	334	36.3942	6.93213
XBXL10_1g3605	XBmRNA6595| suclg1.S	15.08	2	4	4	4	1215.42	0	0	1.51423e+08	124584	>1000	325	34.318	9.37842
XBXL10_1g30622	XBmRNA57684| ndufb8.L	9.05	1	1	2	2	299.125	0	0	151076146	505061	>1000	199	23.0812	8.49951
XBXL10_1g8258	XBmRNA15611| pcbp3.L	31.16	5	8	8	21	#N/A	1.67151e+08	#N/A	1.49859e+08	#N/A	#N/A	353	37.136	7.72314
XBXL10_1g39899	XBmRNA75036| rpn2.L	6.31	2	3	3	5	735.323	4.08744e+07	55587	1.48705e+08	202231	3.63811	650	71.3217	5.36377
XBXL10_1g25372	XBmRNA47382| LOC108705582	19.92	2	8	8	8	1032.58	0	0	1.48147e+08	143473	>1000	497	53.6228	8.49951
XBXL10_1g40857	XBmRNA77039| ndufb3.L	12.37	2	2	2	2	922.167	0	0	147883660	160365	>1000	97	11.2227	9.64209
XBXL10_1g40907	XBmRNA77181| eef1b2.L	40.97	1	4	7	16	3098.1	1.55983e+08	50347.9	147611660	47645.9	0.946333	227	25.1316	4.7417
XBXL10_1g38188	XBmRNA72143| arhgap35.S	0.47	2	1	1	5	25.0705	1.5772e+08	6.29108e+06	147209064	5.87181e+06	0.933354	1478	168.589	6.60986
XBXL10_1g30316	XBmRNA57102| aldh18a1.L	21.86	1	15	15	16	325.614	0	0	1.46285e+08	449260	>1000	828	90.8253	7.69385
XBXL10_1g966	XBmRNA1489| map9.L	1.08	1	1	1	1	#N/A	0	#N/A	1.42946e+08	#N/A	#N/A	646	75.0713	8.49951
XBXL10_1g15958	XBmRNA29823| etfa.S	30.03	2	8	8	9	1323.97	0	0	1.42556e+08	107673	>1000	333	35.0895	8.27979
XBXL10_1g37418	XBmRNA70625| aldh6a1.S	25.24	1	3	9	12	1159.36	0	0	1.38296e+08	119286	>1000	523	56.7269	7.51807
XBXL10_1g7296	XBmRNA13729| hdac1.L	11.04	4	5	5	9	80.2382	0	0	136572014	1.70208e+06	>1000	480	54.7127	5.75732
XBXL10_1g20008	XBmRNA37018| slc25a20.L	15.28	2	4	4	5	362.818	0	0	1.36324e+08	375737	>1000	301	32.793	9.37842
XBXL10_1g10640	XBmRNA19973| sucla2.S	32.1	2	12	12	12	457.119	0	0	1.3142e+08	287496	>1000	458	49.6047	6.78564
XBXL10_1g32442	XBmRNA61199| tpi1.S	27.42	1	2	7	14	5796.81	1.20316e+08	20755.5	1.30331e+08	22483.2	1.08324	248	26.7448	7.35693
XBXL10_1g32054	XBmRNA60438| LOC108696826	26.38	2	6	6	6	747.334	0	0	1.2998e+08	173925	>1000	254	27.654	8.5874
XBXL10_1g17733	XBmRNA32676| pdhx.L	12.55	1	3	6	9	137.013	0	0	1.2935e+08	944072	>1000	478	50.4495	8.19189
XBXL10_1g20953	XBmRNA38757| pdhx.S	11.57	1	3	6	8	358.649	0	0	1.2935e+08	360659	>1000	484	51.4591	8.07471
XBXL10_1g7185	XBmRNA13498| rpl8.L	12.06	2	3	3	8	3302	1.66977e+08	50568.5	128876394	39029.8	0.771819	257	27.9002	10.8872
XBXL10_1g27102	XBmRNA50755| hibadh.L	4.27	2	1	1	2	1170.29	0	0	1.27464e+08	108916	>1000	328	34.4391	7.86963
XBXL10_1g32865	XBmRNA62054| ndufb8.S	16.08	1	2	3	3	555.453	0	0	1.27127e+08	228871	>1000	199	22.9481	7.91357
XBXL10_1g4054	XBmRNA7445| camk2d.S	28.12	3	9	11	35	93.1718	1.20424e+08	1.29249e+06	1.26396e+08	1.35659e+06	1.04959	537	60.6128	7.44482
XBXL10_1g14779	XBmRNA27553| LOC108710511	23.9	3	4	4	10	33.0984	0	0	1.25551e+08	3.79328e+06	>1000	159	18.421	9.05615
XBXL10_1g20580	XBmRNA37846| cfl1.S	11.9	2	2	2	4	1705.25	123328886	72323.2	125453638	73569.2	1.01723	168	19.1077	7.75244
XBXL10_1g33441	XBmRNA63117| atad3a.S	16.53	2	11	11	15	61.1342	1.79254e+07	293214	1.25114e+08	2.04655e+06	6.9797	593	66.8217	8.96826
XBXL10_1g15016	XBmRNA27965| agk.S	5.14	1	1	1	1	274.777	0	0	124922257	454631	>1000	428	47.8981	7.41553
XBXL10_1g12864	XBmRNA24308| tubal3.1.L	34.67	1	1	14	40	1992.68	3.67552e+08	184451	1.24799e+08	62629	0.339542	450	50.0354	5.14795
XBXL10_1g16027	XBmRNA29970| tubal3.1.S	34.67	3	0	14	35	438.719	3.67552e+08	837785	1.24799e+08	284463	0.339542	450	50.1675	5.14795
XBXL10_1g9049	XBmRNA16840| tomm70.S	21.35	1	10	10	17	482.739	0	0	1.24645e+08	258204	>1000	576	64.6865	6.30322
XBXL10_1g28391	XBmRNA53339| eef1d.L	6.57	2	2	5	9	579.053	1.2095e+08	208876	124416305	214862	1.02865	715	78.9545	6.50732
XBXL10_1g8338	XBmRNA15742| ckap2.L	10.66	1	4	8	13	17.0503	116135410	6.81133e+06	124121338	7.27971e+06	1.06876	713	79.4796	9.51025
XBXL10_1g16149	XBmRNA30267| ndufa5.S	31.03	1	1	2	2	1098.07	0	0	123886901	112823	>1000	116	13.4631	6.11279
XBXL10_1g1428	XBmRNA2470| eef2.1.L	33.22	5	5	24	70	958.44	2.60777e+08	272084	1.22965e+08	128297	0.471533	858	95.3659	6.93213
XBXL10_1g4292	XBmRNA7966| eef2.1.S	30.54	5	3	22	65	1896.65	2.60777e+08	137493	1.22965e+08	64832.5	0.471533	858	95.4619	6.82959
XBXL10_1g30203	XBmRNA56840| tfam.L	23.62	2	8	8	14	480.079	2.04456e+07	42588	1.21007e+08	252056	5.91848	309	35.4786	10.2134
XBXL10_1g40989	XBmRNA77321| hspe1.L	20.59	1	1	3	4	3038.48	0	0	1.20673e+08	39714.9	>1000	102	11.0911	8.92432
XBXL10_1g18233	XBmRNA33605| eef1g.L	33.26	1	6	12	25	1506.88	3.82212e+08	253644	1.20427e+08	79917.9	0.315079	436	49.8312	7.38623
XBXL10_1g8821	XBmRNA16558| tmem126a.L	8.64	1	2	2	4	168.34	2.73771e+07	162630	1.19641e+08	710708	4.3701	220	24.3468	8.79248
XBXL10_1g4963	XBmRNA9283| LOC108707006	44.16	1	3	3	10	#N/A	5.32297e+07	#N/A	1.19389e+08	#N/A	#N/A	77	8.67265	7.18115
XBXL10_1g30025	XBmRNA56526| dclre1a.L	18.92	1	14	14	44	64.4988	2.51599e+08	3.90083e+06	118825217	1.84228e+06	0.47228	941	104.478	8.92432
XBXL10_1g11185	XBmRNA21011| rps3.S	54.07	2	14	14	37	404.778	2.43049e+08	600450	1.17636e+08	290619	0.484002	246	26.9986	9.65674
XBXL10_1g34622	XBmRNA65417| psmb7.L	20.22	1	5	5	9	745.436	0	0	1.17511e+08	157640	>1000	277	29.93	8.29443
XBXL10_1g39733	XBmRNA74743| LOC108700998	2.76	1	1	1	1	171.25	0	0	116035594	677580	>1000	290	32.0605	9.51025
XBXL10_1g43730	XBmRNA82321| hspe1.S	27.45	1	1	3	4	4210.59	0	0	1.15991e+08	27547.6	>1000	102	11.093	8.36768
XBXL10_1g24374	XBmRNA45635| LOC108717172	1.35	1	1	1	2	#N/A	0	#N/A	1.14996e+08	#N/A	#N/A	518	59.0128	8.38232
XBXL10_1g9782	XBmRNA18295| mpc2.S	16.92	1	2	2	3	563.957	0	0	1.14648e+08	203291	>1000	130	14.4727	10.228
XBXL10_1g12326	XBmRNA23037| sfxn1.L	22.36	1	7	7	7	573.779	0	0	114034452	198743	>1000	322	35.6284	9.31982
XBXL10_1g17614	XBmRNA32444| rps13.L	20	1	1	3	7	1364.32	9.92251e+07	72728.7	113887976	83476.1	1.14777	155	17.9856	10.0815
XBXL10_1g10359	XBmRNA19354| c1qbp.S	19.37	1	1	2	7	547.979	66178280	120768	1.12247e+08	204839	1.69614	191	21.9676	4.66553
XBXL10_1g34190	XBmRNA64494| rpl12.L	50.3	2	6	6	17	1934.9	2.13446e+08	110314	110586234	57153.5	0.5181	165	17.7555	9.14404
XBXL10_1g6992	XBmRNA13089| tuba5.L	28.95	1	1	10	24	449.487	2.81085e+08	625347	109190047	242922	0.388459	449	49.9475	5.14795
XBXL10_1g7848	XBmRNA14778| pcca.L	5.52	1	3	3	4	550.35	0	0	109028885	198108	>1000	724	79.8927	6.85889
XBXL10_1g7379	XBmRNA13887| ndufs5.L	29.81	1	3	3	6	928.644	73642913	79301.6	1.08521e+08	116859	1.47361	104	12.4152	8.44092
XBXL10_1g30266	XBmRNA56981| acadsb.L	5.36	1	2	2	2	636.486	0	0	1.07656e+08	169141	>1000	429	47.4928	7.35693
XBXL10_1g1559	XBmRNA2765| cirbp.L	31.93	1	3	4	17	1939.67	399710309	206072	1.07643e+08	55495.8	0.269303	166	17.8923	9.17334
XBXL10_1g9867	XBmRNA18437| tuba5.S	29.11	1	0	10	25	1410.02	2.83441e+08	201019	107282915	76085.9	0.378501	450	50.0545	5.05908
XBXL10_1g10680	XBmRNA20062| tuba1c.S	36.3	5	2	13	26	48.8467	264265782	5.4101e+06	107282915	2.19632e+06	0.405966	449	49.8475	5.09717
XBXL10_1g12702	XBmRNA23841| ndufa5.L	31.03	1	1	2	2	806.841	0	0	1.06439e+08	131921	>1000	116	13.4331	6.11279
XBXL10_1g4729	XBmRNA8789| ndufb6.S	7.03	1	1	1	1	439.436	0	0	106353287	242022	>1000	128	15.069	9.77393
XBXL10_1g42263	XBmRNA79441| kpnb1.S	29.57	2	19	19	78	256.372	1.87616e+08	731811	1.06171e+08	414128	0.565895	876	97.0988	4.79248
XBXL10_1g30362	XBmRNA57198| atp5mk.L	32.2	1	2	2	2	359.117	0	0	1.06141e+08	295560	>1000	59	6.56745	9.90576
XBXL10_1g42049	XBmRNA79058| aldoa.L	24.45	2	1	9	16	469.156	1.61332e+08	343876	1.06051e+08	226047	0.65735	364	39.3814	8.29443
XBXL10_1g44362	XBmRNA83374| aldoa.S	24.45	2	1	9	16	3707.27	1.61332e+08	43517.7	1.06051e+08	28606.3	0.65735	364	39.3614	8.29443
XBXL10_1g2611	XBmRNA4564| rplp0.L	39.49	2	9	9	31	342.854	220937873	644407	106011678	309203	0.479826	314	34.0496	5.56689
XBXL10_1g3936	XBmRNA7199| rps3a.S	33.33	1	1	9	35	1235.57	2.26655e+08	183441	1.05703e+08	85549.7	0.46636	264	29.9218	9.71533
XBXL10_1g16330	XBmRNA30661| rps16.S	37.09	2	6	6	14	3791.21	120210054	31707.6	102656769	27077.6	0.853978	151	16.9242	10.1401
XBXL10_1g36208	XBmRNA68559| XB5997770.L	37.88	1	6	6	21	303.905	1.48622e+08	489042	1.0237e+08	336850	0.688796	264	29.1652	7.7085
XBXL10_1g32548	XBmRNA61405| oat.S	18.68	2	6	6	6	1184.55	0	0	101905277	86028.5	>1000	439	47.9826	6.62451
XBXL10_1g29711	XBmRNA55915| uqcrb.S	11.71	1	2	2	2	1797.01	0	0	1.01476e+08	56469.3	>1000	111	13.4891	9.45166
XBXL10_1g6262	XBmRNA11758| gart.L	0.69	1	1	1	3	647.792	1.13558e+08	175299	101310106	156393	0.892147	1013	105.992	6.55127
XBXL10_1g27954	XBmRNA52479| rps20.L	26.05	1	1	4	10	1181.97	1.68048e+08	142176	1.00739e+08	85229.4	0.599466	119	13.3473	9.93506
XBXL10_1g29557	XBmRNA55618| rps20.S	26.05	1	1	4	9	2383.11	1.20081e+08	50388.2	1.00739e+08	42272.1	0.838927	119	13.3353	9.93506
XBXL10_1g2746	XBmRNA4831| pgam5.L	13.21	2	5	5	13	192.704	2.71874e+07	141084	1.00155e+08	519735	3.68387	280	31.4614	9.30518
XBXL10_1g27259	XBmRNA51050| acad11.L	15.79	2	11	11	22	80.0913	4.84966e+07	605517	1.00048e+08	1.24917e+06	2.06299	817	91.8136	8.32373
XBXL10_1g995	XBmRNA1547| rps3a.L	33.33	1	1	9	33	2983.32	1.98958e+08	66690	1.00016e+08	33524.9	0.502698	264	29.8637	9.71533
XBXL10_1g30521	XBmRNA57488| cox5b.2.L	33.59	1	3	3	4	1882.66	0	0	9.94813e+07	52840.7	>1000	131	14.8386	8.80713
XBXL10_1g12132	XBmRNA22627| ndufa2.L	34	1	3	3	3	1451.06	0	0	97484772	67181.8	>1000	100	11.258	9.71533
XBXL10_1g30805	XBmRNA58138| echs1.L	19.23	1	5	5	5	649.189	0	0	9.70979e+07	149568	>1000	286	31.114	8.42627
XBXL10_1g38738	XBmRNA73072| sdhc.S	21.89	2	3	3	4	507.025	0	0	96754076	190827	>1000	169	18.4958	10.3892
XBXL10_1g33529	XBmRNA63272| LOC108697688	21.19	2	3	3	9	#N/A	2.07251e+08	#N/A	9.66862e+07	#N/A	#N/A	151	17.3297	10.3745
XBXL10_1g1612	XBmRNA2867| ndufa11.L	20.59	2	2	2	2	#N/A	0	#N/A	9.61523e+07	#N/A	#N/A	136	14.3585	8.71924
XBXL10_1g27209	XBmRNA50942| LOC121394610	31.16	2	4	4	8	2656.61	1.13502e+08	42724.4	9.56379e+07	36000	0.842609	138	16.1267	10.5356
XBXL10_1g19174	XBmRNA35437| rps8.L	30.77	2	6	6	12	3660.54	1.60325e+08	43798.4	95144837	25992.1	0.593448	208	24.0361	10.3745
XBXL10_1g19988	XBmRNA36984| rpn1.L	19.16	2	8	8	8	954.326	0	0	9.50759e+07	99626.1	>1000	595	67.1777	6.58057
XBXL10_1g19943	XBmRNA36893| h1-8.L	25.2	1	3	6	16	89.2176	1.63577e+08	1.83346e+06	9.43867e+07	1.05794e+06	0.577018	250	26.5689	10.1841
XBXL10_1g9675	XBmRNA18030| rps10.S	36.97	1	1	5	20	215.375	1.23311e+08	572543	9.42805e+07	437751	0.764573	165	18.8989	10.1108
XBXL10_1g7099	XBmRNA13303| rps10.L	38.89	1	2	6	19	1955.86	1.23311e+08	63047.3	9.42805e+07	48204.2	0.764573	180	20.6719	10.272
XBXL10_1g7634	XBmRNA14335| c1qbp.L	16.18	1	2	3	7	590.102	66178280	112147	94088866	159445	1.42175	272	30.7631	4.84326
XBXL10_1g18211	XBmRNA33552| stip1.L	25.05	2	11	14	19	1370.1	2.13777e+07	15603.1	9.38673e+07	68511.4	4.39089	543	62.0674	7.32764
XBXL10_1g12865	XBmRNA24309| tubal3.2.L	26.06	1	1	10	31	640.058	2.5873e+08	404230	9.36899e+07	146377	0.362114	449	50.0334	5.09717
XBXL10_1g7707	XBmRNA14523| rpl31.L	18.4	1	2	2	6	#N/A	1.69316e+08	#N/A	93664742	#N/A	#N/A	125	14.507	10.5649
XBXL10_1g28731	XBmRNA53999| rbm33.S	25.82	1	20	21	76	4.87096	174723348	3.58704e+07	9.33271e+07	1.91599e+07	0.534142	1309	146.701	7.12256
XBXL10_1g42256	XBmRNA79433| rpl23.S	25.71	1	3	3	12	2897.68	1.90705e+08	65812.9	9.28156e+07	32031	0.486697	140	14.842	10.5063
XBXL10_1g11488	XBmRNA21563| ssbp1.L	15.75	2	2	2	2	573.952	0	0	9.21338e+07	160525	>1000	146	16.7328	9.75928
XBXL10_1g8203	XBmRNA15514| senp1.L	15.42	2	9	9	16	7.71309	5.31219e+07	6.88724e+06	9.12078e+07	1.18251e+07	1.71695	616	70.209	9.23193
XBXL10_1g34412	XBmRNA64971| ass1.S	1.7	1	1	1	5	#N/A	134442289	#N/A	89324747	#N/A	#N/A	411	46.7198	7.69385
XBXL10_1g39734	XBmRNA74744| mrpl12.L	22.63	1	4	4	4	851.852	0	0	8.92358e+07	104755	>1000	190	20.8022	8.54346
XBXL10_1g21820	XBmRNA40487| rpl5.S	20.61	2	5	5	12	2651	1.40441e+08	52976.4	8.84139e+07	33351.1	0.629546	296	34.0898	9.64209
XBXL10_1g3755	XBmRNA6833| LOC108706570	15.1	1	1	2	5	752.942	1.15316e+08	153154	87791568	116598	0.761313	192	21.9059	10.1401
XBXL10_1g760	XBmRNA1039| rpl9.L	15.1	1	1	2	4	1786.18	103060228	57698.7	87791568	49150.5	0.851847	192	21.8848	10.0376
XBXL10_1g31544	XBmRNA59636| ndufa3.L	10.47	2	1	1	1	830.144	0	0	86728762	104474	>1000	86	9.31082	8.45557
XBXL10_1g35405	XBmRNA66853| rps18.L	47.02	2	9	9	24	#N/A	2.27902e+08	#N/A	8.6561e+07	#N/A	#N/A	151	17.5348	10.8726
XBXL10_1g31893	XBmRNA60194| rps9.L	33.51	2	1	8	17	643.139	1.72908e+08	268851	8.65075e+07	134508	0.500308	194	22.5936	10.5796
XBXL10_1g33715	XBmRNA63679| rps9	33.51	1	1	8	17	4018.96	1.72908e+08	43023.1	8.65075e+07	21524.8	0.500308	194	22.5636	10.5796
XBXL10_1g40827	XBmRNA76940| acadl.L	7.66	1	3	3	3	1264.1	0	0	8.49652e+07	67214.2	>1000	444	49.2429	7.95752
XBXL10_1g18197	XBmRNA33529| prdx5.L	9.52	1	1	1	1	1475.07	0	0	84918104	57569	>1000	189	20.0534	8.36768
XBXL10_1g5584	XBmRNA10469| mccc2.S	9.61	1	4	4	5	475.044	0	0	8.4822e+07	178556	>1000	562	61.3253	8.25049
XBXL10_1g1801	XBmRNA3203| XB22169562.L	21.07	1	4	4	4	881.832	0	0	8.46558e+07	96000	>1000	242	27.4961	8.1333
XBXL10_1g4311	XBmRNA7993| plin3.S	20.47	2	7	7	9	587.391	5.07183e+07	86345	84418832	143718	1.66446	425	46.1541	5.5415
XBXL10_1g35220	XBmRNA66488| apool.L	29.24	1	6	6	10	562.231	0	0	8.37389e+07	148940	>1000	301	33.3382	5.85889
XBXL10_1g37714	XBmRNA71271| hsd17b10.S	16.92	2	4	4	5	830.3	0	0	8.37006e+07	100808	>1000	260	27.2685	8.5874
XBXL10_1g10331	XBmRNA19301| rpl24.S	22.58	2	4	4	8	2629.26	1.30092e+08	49478.8	8.35563e+07	31779.4	0.642284	155	17.6788	11.2534
XBXL10_1g15230	XBmRNA28394| rps14.S	17.88	3	3	3	9	#N/A	1.75302e+08	#N/A	8.35103e+07	#N/A	#N/A	151	16.2625	10.0522
XBXL10_1g23242	XBmRNA43313| mpc1.L	18.92	2	1	1	1	9.69097	0	0	82158915	8.47788e+06	>1000	111	12.7636	9.75928
XBXL10_1g21068	XBmRNA38995| rps13.S	45.03	1	6	8	21	2153.55	2.19785e+08	102057	8.17751e+07	37972.2	0.372068	151	17.2397	10.6089
XBXL10_1g43523	XBmRNA81889| LOC108703005	19.71	2	3	3	3	279.255	0	0	8.1752e+07	292750	>1000	274	31.1537	5.87158
XBXL10_1g34963	XBmRNA66046| nono.L	46.12	1	18	20	43	231.394	8.18749e+07	353833	81605096	352667	0.996704	464	53.1536	8.67529
XBXL10_1g33833	XBmRNA63888| rps19.S	29.84	2	6	6	17	3301.56	2.22937e+08	67524.7	8.04352e+07	24362.8	0.360798	191	21.2452	10.2866
XBXL10_1g28657	XBmRNA53839| smarcc1.S	1.26	4	2	2	4	45.9377	7.42491e+07	1.6163e+06	7.96326e+07	1.73349e+06	1.07251	1188	132.246	5.46533
XBXL10_1g22227	XBmRNA41314| h1-8.S	28.9	1	4	7	23	525.192	2.20616e+08	420068	7.93738e+07	151133	0.359783	263	28.1799	10.1548
XBXL10_1g34782	XBmRNA65761| rps4x.L	35.74	2	10	10	30	3446.86	2.70773e+08	78556.5	7.88533e+07	22876.8	0.291215	263	29.63	10.1548
XBXL10_1g23250	XBmRNA43322| tomm20.L	4.76	2	1	1	1	184.075	0	0	78741854	427770	>1000	147	16.4377	8.6167
XBXL10_1g30169	XBmRNA56756| mlf2.L	9.88	1	2	2	4	7.34515	5.58757e+07	7.60715e+06	7.75006e+07	1.05513e+07	1.38702	243	27.5868	6.87354
XBXL10_1g30841	XBmRNA58218| kdm2a.L	6.76	2	6	6	12	44.8951	0	0	7.74461e+07	1.72505e+06	>1000	1184	135.617	8.00146
XBXL10_1g13298	XBmRNA25220| idh2.L	2.86	2	1	1	1	695.995	0	0	77380830	111180	>1000	454	50.7758	8.06006
XBXL10_1g2936	XBmRNA5249| aldh7a1.L	9.98	1	3	4	4	678.541	0	0	7.67892e+07	113168	>1000	511	55.1044	6.68311
XBXL10_1g34454	XBmRNA65085| LOC121397095	19.03	1	10	10	24	16.5445	1.08013e+08	6.52865e+06	7.61607e+07	4.60338e+06	0.705104	641	71.4282	6.02393
XBXL10_1g23988	XBmRNA44881| eif5a.L	5.19	2	1	1	2	1642.71	26793481	16310.5	7.61193e+07	46337.5	2.84096	154	16.6933	5.80811
XBXL10_1g14268	XBmRNA26919| clpp.L	12.96	2	2	2	2	159.825	0	0	7.59593e+07	475266	>1000	247	27.3172	7.45947
XBXL10_1g26123	XBmRNA48866| pccb.S	15.96	2	7	7	7	69.6082	0	0	7.58847e+07	1.09017e+06	>1000	539	58.8543	8.00146
XBXL10_1g8320	XBmRNA15715| rcbtb1.L	3.67	2	2	2	5	3.71135	3.66999e+07	9.88857e+06	7.56438e+07	2.03818e+07	2.06114	600	66.1862	6.94678
XBXL10_1g13683	XBmRNA25971| npm2.L	19	1	2	3	6	1748.37	4.0601e+07	23222.2	75164140	42991.1	1.85129	200	22.0319	4.84326
XBXL10_1g15336	XBmRNA28658| npm2.S	12.24	1	1	2	5	827.584	4.0601e+07	49059.6	75164140	90823.6	1.85129	196	21.5818	5.021
XBXL10_1g29190	XBmRNA54871| ndufs6.S	36.84	2	3	3	3	189.458	0	0	74733354	394458	>1000	133	14.7224	9.05615
XBXL10_1g28375	XBmRNA53312| LOC108719466	0.75	1	1	1	1	#N/A	0	#N/A	74345967	#N/A	#N/A	929	105.468	6.91748
XBXL10_1g10191	XBmRNA19059| rpl11.S	12.99	3	2	2	5	2878.96	1.93161e+08	67094	74003897	25705.1	0.38312	177	20.1647	9.78857
XBXL10_1g13276	XBmRNA25175| pdia3.L	11.4	2	5	5	6	2327.38	37406138	16072.2	7.37007e+07	31666.8	1.97028	500	55.7541	5.77002
XBXL10_1g5567	XBmRNA10436| rps23.S	20.98	1	3	3	4	2335.26	6.63343e+07	28405.6	73378803	31422.2	1.1062	143	15.7587	10.4771
XBXL10_1g27162	XBmRNA50843| ngly1.L	6.93	2	4	4	5	34.8604	0	0	7.26201e+07	2.08317e+06	>1000	635	72.4844	6.60986
XBXL10_1g2637	XBmRNA4604| acads.L	7.58	1	2	2	2	658.39	0	0	7.19913e+07	109344	>1000	409	44.3638	7.69385
XBXL10_1g33314	XBmRNA62859| rps25.S	28	2	4	4	11	#N/A	1.66814e+08	#N/A	7.19446e+07	#N/A	#N/A	125	13.8207	10.1108
XBXL10_1g33984	XBmRNA64098| ddost.S	7.99	2	3	3	4	339.131	0	0	7.11062e+07	209671	>1000	438	48.6819	5.59229
XBXL10_1g19699	XBmRNA36440| rpl3.L	14.14	4	6	6	10	2888.31	8.19056e+07	28357.7	7.09051e+07	24549	0.865692	403	46.0118	10.1694
XBXL10_1g43247	XBmRNA81305| LOC108702869	39.87	1	7	7	17	3127.71	1.61107e+08	51509.5	7.05471e+07	22555.5	0.437891	158	18.4089	10.4038
XBXL10_1g4126	XBmRNA7594| hpgds.S	15.31	2	3	3	6	3643	1.26607e+08	34753.5	70284833	19293.1	0.555141	196	22.5807	6.25244
XBXL10_1g1974	XBmRNA3511| plin2.L	8.41	2	3	3	5	4216.32	30991667	7350.41	7.00846e+07	16622.2	2.2614	428	47.1685	5.05908
XBXL10_1g28745	XBmRNA54036| wdr37.S	4.25	2	2	2	2	#N/A	0	#N/A	6.97507e+07	#N/A	#N/A	494	54.8095	7.25439
XBXL10_1g35394	XBmRNA66817| rps5.L	27.09	2	5	5	23	2300.13	1.41815e+08	61655.3	6.93199e+07	30137.4	0.488805	203	22.729	9.74463
XBXL10_1g23078	XBmRNA43013| mthfd1l.L	11.15	2	10	10	13	459.879	0	0	6.92117e+07	150500	>1000	960	103.682	8.35303
XBXL10_1g30982	XBmRNA58569| stt3a.L	2.41	2	1	1	2	107.332	0	0	6.91269e+07	644048	>1000	705	80.6029	7.84033
XBXL10_1g38465	XBmRNA72658| ivd.S	15.79	1	6	6	6	741.555	0	0	6.90749e+07	93148.8	>1000	418	45.6553	8.14795
XBXL10_1g13471	XBmRNA25586| erlin2.L	12.84	3	5	5	7	626.854	0	0	6.85401e+07	109340	>1000	335	37.2683	5.71924
XBXL10_1g24013	XBmRNA44934| serpini2.L	1.72	1	1	1	3	#N/A	7.02423e+07	#N/A	6.82774e+07	#N/A	#N/A	408	45.7497	6.45557
XBXL10_1g5470	XBmRNA10209| aldh7a1.S	4.26	1	1	2	2	1155.44	0	0	6.82773e+07	59092	>1000	540	58.6123	7.13721
XBXL10_1g23965	XBmRNA44823| mrpl47.L	5.58	1	1	1	1	260.592	0	0	66696892	255944	>1000	251	29.2492	10.0229
XBXL10_1g18735	XBmRNA34536| dhodh.L	3.47	1	1	1	1	362.301	0	0	66647775	183957	>1000	404	43.6153	8.96826
XBXL10_1g11201	XBmRNA21043| ndufc2.S	10	1	1	1	1	1176.78	0	0	6.59495e+07	56042.2	>1000	110	12.5945	9.40771
XBXL10_1g1139	XBmRNA1786| LOC108710251	0.4	1	1	1	4	10.041	1.37906e+08	1.37343e+07	6.59091e+07	6.56399e+06	0.477927	1991	222.135	6.39209
XBXL10_1g1599	XBmRNA2847| ndufa7.L	25.22	2	2	2	2	893.436	0	0	6.49375e+07	72682.8	>1000	115	12.5875	9.87646
XBXL10_1g25798	XBmRNA48235| mccc1.S	2.09	1	1	1	1	400.747	0	0	6.47697e+07	161622	>1000	716	79.4102	6.63916
XBXL10_1g3372	XBmRNA6148| pik3c3.L	0.89	2	1	1	4	35.6879	7.74977e+07	2.17154e+06	6.47682e+07	1.81485e+06	0.835744	895	102.163	7.03467
XBXL10_1g6687	XBmRNA12534| ywhae.L	18.04	3	2	4	10	1550.72	7.30782e+07	47125.3	6.32014e+07	40756.2	0.864846	255	29.1695	4.77979
XBXL10_1g4476	XBmRNA8316| lsm4.S	5.11	2	1	1	3	#N/A	5.82281e+07	#N/A	6.27974e+07	#N/A	#N/A	137	15.0936	9.99365
XBXL10_1g33677	XBmRNA63604| tomm40.S	12.8	2	2	2	3	104.999	0	0	62041060	590874	>1000	336	36.1273	7.00537
XBXL10_1g43971	XBmRNA82723| nme4.S	12.15	2	2	2	2	233.866	0	0	61774100	264143	>1000	181	19.9212	8.90967
XBXL10_1g27945	XBmRNA52456| mrpl15.L	9.8	1	2	2	2	430.693	0	0	61613638	143057	>1000	296	33.3886	9.86182
XBXL10_1g34352	XBmRNA64825| surf1.L	6.01	1	2	2	2	286.414	0	0	61479447	214653	>1000	316	35.0395	9.5542
XBXL10_1g14227	XBmRNA26835| gcdh.L	7.05	1	4	4	4	315.342	5.88358e+07	186578	6.13382e+07	194513	1.04253	440	48.3676	8.27979
XBXL10_1g41090	XBmRNA77533| ndufb7.L	12.07	2	1	1	1	549.464	0	0	59492732	108274	>1000	116	13.9407	7.47412
XBXL10_1g18831	XBmRNA34720| gpi.L	8.14	3	4	4	6	3380.85	9.56421e+07	28289.3	59409964	17572.5	0.621169	553	61.9185	7.34229
XBXL10_1g11909	XBmRNA22242| vdac1.L	7.42	2	2	2	2	798.556	0	0	59187568	74118.2	>1000	283	30.5664	8.646
XBXL10_1g7727	XBmRNA14564| mrps9.L	8.33	1	2	2	2	327.464	0	0	5.9105e+07	180493	>1000	384	43.8386	9.1001
XBXL10_1g10049	XBmRNA18783| sfpq.S	35.7	2	14	23	95	142.123	1.10542e+08	777795	5.83998e+07	410911	0.528302	661	74.681	9.51025
XBXL10_1g19734	XBmRNA36517| tptep2-csnk1e.L	21.39	4	9	9	17	45.4529	1.26699e+08	2.78748e+06	5.76679e+07	1.26874e+06	0.455158	416	47.2852	9.65674
XBXL10_1g24794	XBmRNA46273| cct4.S	26.06	1	1	10	13	1380.03	1.17211e+08	84933.2	5.74427e+07	41624.1	0.490081	541	57.8487	7.32764
XBXL10_1g3443	XBmRNA6338| LOC108719112	0.82	2	1	1	1	#N/A	0	#N/A	56721843	#N/A	#N/A	852	94.0098	5.60498
XBXL10_1g41045	XBmRNA77440| abat.L	5.8	2	3	3	3	471.174	0	0	5.60797e+07	119021	>1000	500	56.2948	8.11865
XBXL10_1g10921	XBmRNA20530| ckap2.S	33.67	1	18	22	40	24.4669	7.01327e+07	2.86644e+06	5.60232e+07	2.28976e+06	0.798816	686	76.2839	9.33447
XBXL10_1g35660	XBmRNA67336| LOC108698654	23.22	1	4	4	4	37.1444	0	0	5.60017e+07	1.50767e+06	>1000	267	30.9216	7.73779
XBXL10_1g2648	XBmRNA4632| pisd.L	4.62	2	2	2	2	372.169	0	0	55775707	149867	>1000	411	47.3066	9.94971
XBXL10_1g39380	XBmRNA74228| LOC108700938	19.61	1	1	1	1	680.304	0	0	5.52593e+07	81227.4	>1000	51	5.73913	10.0083
XBXL10_1g38763	XBmRNA73126| cct3.S	24.68	2	13	13	15	2199.21	1.16544e+08	52993.7	54414245	24742.6	0.466897	547	60.5975	6.26514
XBXL10_1g22249	XBmRNA41362| chchd6.S	15.33	1	5	5	6	438.76	0	0	5.4231e+07	123601	>1000	300	33.692	7.69385
XBXL10_1g22574	XBmRNA42071| lrpprc.L	1.94	1	2	2	2	301.006	0	0	5.36419e+07	178209	>1000	1391	156.075	6.26514
XBXL10_1g29616	XBmRNA55761| LOC108695345	33.33	3	6	6	12	1500.44	1.49287e+08	99495.6	52961553	35297.3	0.354763	246	28.7302	10.6675
XBXL10_1g21722	XBmRNA40282| cpt2.S	6.37	1	4	4	5	572.057	0	0	5.16775e+07	90336.2	>1000	659	74.5097	8.35303
XBXL10_1g32774	XBmRNA61850| cox15.S	8.27	2	3	3	3	237.863	0	0	5.10896e+07	214786	>1000	411	46.2653	9.93506
XBXL10_1g35937	XBmRNA67934| ckb.L	12.07	3	1	4	5	2442.76	1.18214e+08	48393.7	5.10003e+07	20878.1	0.431423	381	42.5424	6.30322
XBXL10_1g37250	XBmRNA70294| ckb.S	12.6	3	1	4	5	3922.61	1.16309e+08	29650.9	5.10003e+07	13001.6	0.43849	381	42.5196	6.354
XBXL10_1g32451	XBmRNA61218| mlf2.S	11.74	1	2	2	4	6.3952	3.17939e+07	4.97153e+06	50973959	7.97066e+06	1.60326	264	29.8218	6.7417
XBXL10_1g27773	XBmRNA52129| LOC108719188	13.51	1	6	10	10	352.285	0	0	5.09668e+07	144675	>1000	807	89.4484	8.77783
XBXL10_1g33523	XBmRNA63265| rpl22.S	23.44	2	3	3	9	#N/A	8.44831e+07	#N/A	5.07897e+07	#N/A	#N/A	128	14.8068	9.18799
XBXL10_1g43360	XBmRNA81525| dnpep.S	11.93	2	4	4	5	540.966	4.09913e+07	75774.3	50130310	92668.2	1.22295	503	55.5451	6.81494
XBXL10_1g20612	XBmRNA37897| eef1g.S	21.28	1	3	9	11	1938.56	1.34688e+08	69478.5	5.00956e+07	25841.7	0.371938	437	50.2043	7.1665
XBXL10_1g19281	XBmRNA35638| mrpl37.L	1.92	1	1	1	1	246.612	0	0	50045463	202932	>1000	417	47.4191	8.36768
XBXL10_1g27048	XBmRNA50670| igf2bp3.L	31.48	1	3	19	39	853.948	8.03467e+07	94088.5	49922946	58461.3	0.621344	594	65.6023	8.92432
XBXL10_1g28942	XBmRNA54446| igf2bp3.S	31.87	1	2	18	37	99.1831	8.03467e+07	810085	49922946	503341	0.621344	593	65.3451	8.99756
XBXL10_1g35650	XBmRNA67312| ech1.L	6.49	1	2	2	2	552.705	0	0	49535096	89623	>1000	308	34.0224	8.14795
XBXL10_1g583	XBmRNA628| ptcd3.L	6.58	1	3	3	3	224.228	0	0	48717865	217269	>1000	669	76.2566	5.8335
XBXL10_1g28211	XBmRNA52972| ywhaz.L	23.27	3	4	6	15	713.427	66565879	93304.5	4.85143e+07	68001.8	0.728817	245	27.7117	4.79248
XBXL10_1g21275	XBmRNA39368| afg3l1p.S	7.33	1	2	6	6	238.147	0	0	4.83166e+07	202886	>1000	778	86.5725	8.03076
XBXL10_1g23068	XBmRNA42996| LOC108716665	12.95	1	1	2	2	377.079	0	0	47857482	126916	>1000	224	25.1037	8.30908
XBXL10_1g23964	XBmRNA44822| ndufb5.L	12.37	1	2	2	2	695.727	0	0	4.60262e+07	66155.6	>1000	186	21.5801	8.95361
XBXL10_1g6313	XBmRNA11854| mrpl39.L	8.47	1	3	3	3	385.911	0	0	46013376	119233	>1000	354	40.3695	7.91357
XBXL10_1g26149	XBmRNA48924| rps7.S	29.74	1	5	5	10	2802.13	1.3588e+08	48491.5	45757422	16329.5	0.336749	195	22.2694	10.0962
XBXL10_1g37813	XBmRNA71477| psmb7.S	20.22	1	5	5	5	420.396	0	0	4.53581e+07	107894	>1000	277	30.047	8.39697
XBXL10_1g24243	XBmRNA45397| mrps22.L	3.37	1	1	1	1	314.317	0	0	4.51444e+07	143627	>1000	326	37.5643	7.43018
XBXL10_1g19763	XBmRNA36556| mpst.L	3.34	1	1	1	1	503.293	0	0	44234645	87890.5	>1000	299	33.6527	6.60986
XBXL10_1g20630	XBmRNA37982| stip1.S	9.07	1	2	5	7	420.223	9.24936e+06	22010.6	4.42055e+07	105195	4.7793	430	49.7189	6.15088
XBXL10_1g24993	XBmRNA46624| mrpl57.S	7.09	1	1	1	1	354.091	0	0	4.39701e+07	124178	>1000	141	16.9316	9.99365
XBXL10_1g30600	XBmRNA57646| mcu.L	2.95	2	1	1	1	418.481	0	0	43877425	104849	>1000	339	39.1142	8.35303
XBXL10_1g14801	XBmRNA27596| acadvl.L	2.98	1	2	2	2	454.852	0	0	43873849	96457.5	>1000	638	68.8863	8.08936
XBXL10_1g39813	XBmRNA74911| rpl27.L	30.15	3	5	5	11	#N/A	131760760	#N/A	4.38558e+07	#N/A	#N/A	136	15.8468	10.6235
XBXL10_1g18457	XBmRNA33916| pacs1.L	4.11	1	4	4	4	42.5594	0	0	4.38415e+07	1.03012e+06	>1000	875	96.5684	6.97607
XBXL10_1g12553	XBmRNA23483| rpl18a.L	9.09	1	1	2	3	441.597	8.04937e+07	182279	4.37341e+07	99036.3	0.543324	176	20.623	10.9458
XBXL10_1g18411	XBmRNA33846| mrpl11.L	4.69	2	1	1	2	377.443	0	0	43615384	115555	>1000	192	20.6573	9.65674
XBXL10_1g24800	XBmRNA46291| mdh1.S	15.63	2	5	5	8	4074.93	3.70307e+07	9087.44	4.24021e+07	10405.6	1.14505	352	38.401	7.00537
XBXL10_1g22895	XBmRNA42667| cct4.L	30.61	1	4	13	16	998.784	1.4892e+08	149102	4.21008e+07	42152.1	0.282707	539	57.8547	7.60596
XBXL10_1g28855	XBmRNA54280| akap9.S	0.19	1	1	1	3	9.67299	0	0	4.20404e+07	4.34616e+06	>1000	4272	490.469	4.99561
XBXL10_1g3513	XBmRNA6446| idh3b.S	2.36	1	1	1	1	971.331	0	0	41437697	42660.7	>1000	381	42.4708	8.646
XBXL10_1g1265	XBmRNA2076| g3bp2.L	9	2	3	4	8	360.371	5.12213e+07	142135	41223751	114393	0.804817	500	56.317	5.64307
XBXL10_1g3344	XBmRNA6097| rpl17.L	30.98	2	5	5	12	#N/A	1.41316e+08	#N/A	3.98031e+07	#N/A	#N/A	184	21.3964	10.1841
XBXL10_1g35915	XBmRNA67877| dync1h1.L	32.7	5	19	130	181	427.329	92743127	217030	3.91803e+07	91686.6	0.42246	4645	532.561	6.43018
XBXL10_1g37264	XBmRNA70327| LOC108699777	31.67	5	19	130	177	114.65	92743127	808921	3.91803e+07	341737	0.42246	4645	532.398	6.45557
XBXL10_1g8016	XBmRNA15158| LOC108708554	25.76	1	12	12	20	9.3778	2.86013e+07	3.04989e+06	3.90249e+07	4.16142e+06	1.36445	691	74.9279	9.1001
XBXL10_1g6297	XBmRNA11815| cct8.L	26.17	2	13	13	14	1284.41	1.02056e+08	79457.2	3.84893e+07	29966.5	0.37714	554	60.3628	5.60498
XBXL10_1g29066	XBmRNA54661| mrpl3.S	5.87	2	2	2	2	254.138	0	0	3.78637e+07	148988	>1000	341	38.0855	9.42236
XBXL10_1g10581	XBmRNA19839| pibf1.S	5.03	1	4	4	5	8.59084	0	0	3.76644e+07	4.38425e+06	>1000	755	89.4764	6.37939
XBXL10_1g3074	XBmRNA5556| mrps27.L	6.68	1	2	2	2	296.02	0	0	3.72925e+07	125980	>1000	404	46.6038	6.3667
XBXL10_1g5418	XBmRNA10112| rpl6.S	14.33	1	1	4	6	2690.42	1.06757e+08	39680.4	36948837	13733.5	0.346103	293	33.7318	10.7114
XBXL10_1g2876	XBmRNA5135| rpl6.L	20.54	1	2	5	8	996.02	6.97779e+07	70056.7	36948837	37096.5	0.529521	258	29.6408	10.9604
XBXL10_1g37002	XBmRNA69786| tdrkh.L	6.41	1	4	4	4	298.833	0	0	3.66777e+07	122736	>1000	718	79.4544	5.17334
XBXL10_1g40479	XBmRNA76149| LOC108701269	6.11	1	1	1	1	99.5733	0	0	3.63241e+07	364797	>1000	131	15.1673	11.1948
XBXL10_1g20088	XBmRNA37210| suclg2.L	4.64	1	2	2	2	831.203	0	0	3.61206e+07	43455.8	>1000	431	46.5322	5.47803
XBXL10_1g15033	XBmRNA27998| rtcb.S	14.46	2	6	6	8	572.402	4.52076e+07	78978.8	3.58401e+07	62613.5	0.792789	505	55.2157	7.23975
XBXL10_1g30346	XBmRNA57164| MGC82327	43.57	3	9	9	12	2421.76	104316547	43074.7	3.43991e+07	14204.2	0.329757	241	27.5791	6.3667
XBXL10_1g24148	XBmRNA45165| cul3.L	4.95	4	4	4	7	161.986	2.83551e+07	175047	3.31875e+07	204879	1.17042	768	88.8944	8.48486
XBXL10_1g39957	XBmRNA75126| ahcy.L	8.55	3	3	3	4	639.181	4.63996e+07	72592.3	33145808	51856.7	0.714356	433	47.7163	6.48096
XBXL10_1g829	XBmRNA1207| paics.1.L	11.09	2	9	9	11	1280.22	6.82246e+08	532911	32824764	25639.9	0.0481128	983	111.31	8.06006
XBXL10_1g28191	XBmRNA52936| rpl30.L	31.03	2	3	3	7	2923.54	6.51492e+07	22284.4	32447804	11098.8	0.498054	116	12.9299	9.62744
XBXL10_1g31070	XBmRNA58762| ddx6.L	25.78	2	8	8	11	739.1	4.20473e+07	56889.9	32175027	43532.7	0.76521	481	54.0391	8.70459
XBXL10_1g39729	XBmRNA74733| p4hb.L	2.94	2	2	2	2	2562.62	0	0	3.19265e+07	12458.5	>1000	510	57.1919	4.83057
XBXL10_1g42246	XBmRNA79409| LOC108702499	13.2	1	2	2	4	3090.01	5.73429e+07	18557.5	31358669	10148.4	0.546862	197	23.4662	11.4731
XBXL10_1g7561	XBmRNA14207| cct6a.L	19.02	1	1	7	12	2112.39	1.02461e+08	48504.7	3.12977e+07	14816.3	0.30546	531	57.6505	6.75635
XBXL10_1g10285	XBmRNA19229| cct6a.S	19.02	1	1	7	10	479.383	1.02461e+08	213735	3.12977e+07	65287.5	0.30546	531	57.7505	6.68311
XBXL10_1g17174	XBmRNA31837| LOC108703484	3.76	1	1	1	1	344.866	0	0	3.1008e+07	89913.1	>1000	213	24.8752	9.80322
XBXL10_1g38413	XBmRNA72560| timm50.S	11.96	2	4	4	4	237.736	0	0	3.02223e+07	127125	>1000	368	41.6626	7.47412
XBXL10_1g1304	XBmRNA2145| LOC108711198	6.7	1	2	2	2	486.486	0	0	3.0181e+07	62038.8	>1000	403	44.3601	5.2876
XBXL10_1g11289	XBmRNA21183| numa1.S	0.56	15	2	2	2	26.8977	0	0	29627552	1.10149e+06	>1000	2302	262.619	6.25244
XBXL10_1g24987	XBmRNA46611| ints7.S	1.02	1	1	1	1	19.4357	0	0	28293432	1.45574e+06	>1000	978	108.572	8.07471
XBXL10_1g35891	XBmRNA67803| rtraf.L	14.58	2	4	4	6	330.212	2.37784e+07	72009.6	27817119	84240.2	1.16985	240	27.6034	6.90283
XBXL10_1g26825	XBmRNA50159| pitrm1.L	2.63	1	1	1	1	401.171	0	0	27799956	69297	>1000	1027	116.59	6.46826
XBXL10_1g7646	XBmRNA14360| LOC108708365	3.78	2	1	1	1	336.885	0	0	2.72295e+07	80827.3	>1000	185	21.4772	9.20264
XBXL10_1g25198	XBmRNA47040| tcp1.S	15.5	2	9	9	11	2063.56	98100535	47539.4	2.66788e+07	12928.5	0.271954	555	60.0604	6.31592
XBXL10_1g1976	XBmRNA3513| rps6.L	16.47	2	5	5	12	3045.72	1.10608e+08	36315.9	2.66003e+07	8733.68	0.240492	249	28.6909	10.9019
XBXL10_1g26067	XBmRNA48774| mrpl44.S	2.17	1	1	1	1	340.217	0	0	2.65956e+07	78172.3	>1000	322	36.1288	6.55127
XBXL10_1g732	XBmRNA984| sepsecs.L	1.38	1	1	1	3	98.6458	3.56507e+07	361401	26292067	266530	0.737492	506	55.7316	7.92822
XBXL10_1g4933	XBmRNA9228| habp4.S	5.29	1	2	2	4	1850.48	0	0	2.59149e+07	14004.4	>1000	378	42.6501	6.7417
XBXL10_1g3847	XBmRNA7035| acsl1.S	3.15	2	2	2	2	370.152	0	0	2.5372e+07	68544.8	>1000	698	78.3511	7.18115
XBXL10_1g12837	XBmRNA24215| dhtkd1.L	6.58	1	5	5	6	251.835	0	0	2.4563e+07	97535.9	>1000	927	104.037	6.88818
XBXL10_1g23658	XBmRNA44155| bckdhb.L	2.93	2	1	1	1	141.539	0	0	2.4139e+07	170547	>1000	375	41.4121	6.354
XBXL10_1g12696	XBmRNA23821| aass.L	0.84	1	1	1	1	459.922	0	0	2.27693e+07	49506.8	>1000	949	105.54	6.94678
XBXL10_1g23195	XBmRNA43209| sccpdh.2.L	2.8	2	1	1	1	440.529	0	0	22334881	50700.1	>1000	429	46.6012	8.88037
XBXL10_1g19590	XBmRNA36255| mcm5.L	3.13	2	2	2	3	581.268	3.05401e+07	52540.5	2.11059e+07	36310.1	0.691087	735	82.383	8.27979
XBXL10_1g41390	XBmRNA78110| rps2.L	24.2	2	7	7	20	160.381	1.40847e+08	878204	2.0624e+07	128594	0.146428	281	30.2551	10.1548
XBXL10_1g18666	XBmRNA34337| LOC121393045	36.49	4	8	8	16	687.377	8.4929e+07	123555	2.05739e+07	29931.1	0.242249	211	24.1565	11.5171
XBXL10_1g34688	XBmRNA65567| tktl2.L	4.16	3	3	3	3	2503.13	2.28964e+07	9147.12	20388832	8145.35	0.890482	625	67.4088	6.72705
XBXL10_1g40689	XBmRNA76605| dync1i2.L	25.5	2	13	13	22	261.227	9.3659e+06	35853.5	20377137	78005.5	2.17567	655	73.0737	5.23682
XBXL10_1g8057	XBmRNA15225| pa2g4.L	14.87	2	5	5	5	617.984	3.58194e+07	57961.8	2.02951e+07	32840.7	0.566593	390	43.4431	6.80029
XBXL10_1g33636	XBmRNA63524| rpl28.S	8.03	1	1	1	3	1113.79	4.88918e+07	43897	20252023	18183.1	0.414221	137	15.5407	11.854
XBXL10_1g6968	XBmRNA13043| stmn1.L	6.9	4	1	1	2	163.614	1.56458e+07	95626.7	20235636	123679	1.29336	145	16.7788	7.23975
XBXL10_1g40307	XBmRNA75763| sco1.L	2.88	1	1	1	1	269.994	0	0	20111688	74489.4	>1000	278	30.6867	8.38232
XBXL10_1g21943	XBmRNA40764| myh9.S	2.24	5	4	4	7	543.621	4.41768e+07	81264	1.96811e+07	36203.7	0.445507	1960	226.739	5.5542
XBXL10_1g14920	XBmRNA27738| ybx2.L	37.33	5	7	11	18	1186.44	4.90691e+07	41358.2	1.95888e+07	16510.5	0.399208	367	40.6304	9.31982
XBXL10_1g11311	XBmRNA21229| alox12b.S	14.33	2	7	7	9	1012.01	1.32003e+08	130436	1.93482e+07	19118.6	0.146574	670	75.8792	6.06201
XBXL10_1g34553	XBmRNA65293| bcap31.L	3.69	1	1	1	1	270.018	0	0	1.84549e+07	68346.7	>1000	244	27.8552	9.05615
XBXL10_1g30064	XBmRNA56603| eif3a.L	4.03	2	2	2	2	169.684	0	0	1.83586e+07	108193	>1000	1390	164.418	6.72705
XBXL10_1g21283	XBmRNA39379| atxn1l.S	1.16	1	1	1	1	#N/A	0	#N/A	1.79567e+07	#N/A	#N/A	691	74.9103	7.12256
XBXL10_1g12047	XBmRNA22476| mrpl22.L	4.41	1	1	1	1	375.825	0	0	1.76863e+07	47059.9	>1000	204	23.3982	9.62744
XBXL10_1g30745	XBmRNA57982| ogdhl.L	2.55	3	3	3	3	152.184	0	0	1.7583e+07	115538	>1000	1018	115.497	6.69775
XBXL10_1g41402	XBmRNA78126| hagh.L	3.17	1	1	1	1	526.025	0	0	1.70603e+07	32432.5	>1000	315	34.9416	8.1626
XBXL10_1g34506	XBmRNA65203| LOC108704467	1.36	7	4	4	5	685.668	2.08488e+07	30406.5	1.63374e+07	23827	0.783616	2644	281.308	5.90967
XBXL10_1g17828	XBmRNA32880| cat.2.L	1.33	2	1	1	1	370.326	0	0	1.56798e+07	42340.4	>1000	528	60.2078	7.63525
XBXL10_1g951	XBmRNA1465| etfdh.L	2.92	1	2	2	3	292.109	0	0	15477439	52985.1	>1000	616	68.3927	7.43018
XBXL10_1g13675	XBmRNA25960| LOC108711609	6.26	3	2	2	2	#N/A	0	#N/A	14170810	#N/A	#N/A	511	56.4056	5.90967
XBXL10_1g24605	XBmRNA45994| rab10.L	6	2	1	1	1	#N/A	0	#N/A	1.40236e+07	#N/A	#N/A	200	22.5546	8.38232
XBXL10_1g37776	XBmRNA71402| idh3g.S	1.97	1	1	1	1	582.193	0	0	13550898	23275.6	>1000	406	44.4858	9.0415
XBXL10_1g27740	XBmRNA52070| timm21.L	3	2	1	1	1	28.0226	0	0	1.2982e+07	463268	>1000	233	26.2125	9.26123
XBXL10_1g39972	XBmRNA75172| nfs1.L	2.25	1	1	1	1	449.07	0	0	1.24667e+07	27761.1	>1000	444	49.4384	8.04541
XBXL10_1g39473	XBmRNA74400| nsfl1c.L	2.16	2	1	1	1	601.723	0	0	1.24469e+07	20685.5	>1000	370	40.6283	5.13525
XBXL10_1g4385	XBmRNA8153| rps15.S	7.56	1	1	1	3	1719.48	1.8454e+07	10732.4	1.12717e+07	6555.29	0.610796	172	20.0976	10.1987
XBXL10_1g11128	XBmRNA20906| alg8.S	3.12	1	1	1	1	241.382	0	0	1.06843e+07	44263.1	>1000	545	61.2663	9.02686
XBXL10_1g2159	XBmRNA3968| habp4.L	9.57	1	2	2	2	1645.8	0	0	1.04079e+07	6323.92	>1000	418	46.8794	7.56201
XBXL10_1g13876	XBmRNA26381| dnajb1.L	17.58	5	5	5	6	193.008	39471371	204506	1.03153e+07	53445.2	0.261337	347	38.2583	8.32373
XBXL10_1g24416	XBmRNA45701| ddx1.L	15.54	1	9	9	13	385.013	7.48084e+07	194301	8.9001e+06	23116.4	0.118972	740	82.2948	7.37158
XBXL10_1g13517	XBmRNA25690| pcna.L	6.51	2	2	2	4	1488.75	2.88442e+07	19374.8	8.36529e+06	5618.99	0.290016	261	28.7903	4.65283
XBXL10_1g42311	XBmRNA79536| pabpc1l.S	15.58	5	8	8	11	445.462	1.27597e+07	28643.6	8299594	18631.4	0.650456	629	70.6586	9.31982
XBXL10_1g15214	XBmRNA28368| npm1.S	24.33	3	5	5	6	610.718	0	0	7.32648e+06	11996.5	>1000	300	33.6407	4.84326
XBXL10_1g13582	XBmRNA25819| tmed4.L	3.95	2	1	1	1	116.836	0	0	7.0421e+06	60273.6	>1000	228	26.5176	7.94287
XBXL10_1g38474	XBmRNA72670| dnajc17.S	2.1	2	1	1	1	218.639	0	0	6.85254e+06	31341.7	>1000	333	37.2891	7.91357
XBXL10_1g30574	XBmRNA57581| anxa7.L	7.12	2	4	4	5	756.525	4.38511e+07	57963.8	5.40047e+06	7138.52	0.123155	520	53.9634	7.1665
XBXL10_1g43041	XBmRNA80905| mrpl58.S	5.88	2	1	1	1	200.097	0	0	4775544	23866.1	>1000	187	21.114	9.90576
XBXL10_1g18464	XBmRNA33930| men1.L	1.78	1	1	1	1	15.0616	0	0	4.75618e+06	315781	>1000	675	74.6837	6.59521
XBXL10_1g3035	XBmRNA5485| cox7c.L	14.29	2	1	1	1	781.553	0	0	4.39879e+06	5628.27	>1000	63	7.34389	11.3999
XBXL10_1g4	XBmRNA6| mrps26.L	4.41	1	1	1	1	414.257	0	0	2.29516e+06	5540.43	>1000	204	24.1365	8.45557
XBXL10_1g17465	XBmRNA32219| XB5888885.S	46.52	1	15	20	1153	1541.66	5.39171e+10	3.49733e+07	1.64811e+11	1.06905e+08	3.05676	460	50.1606	8.5874
XBXL10_1g14663	XBmRNA27434| XB5888885.L	45.89	1	14	19	890	581.222	5.39171e+10	9.27651e+07	1.64811e+11	2.8356e+08	3.05676	462	50.5518	8.27979
XBXL10_1g15220	XBmRNA28380| zp4.S	32.17	1	10	17	164	861.468	2.56712e+10	2.97993e+07	6.87586e+10	7.98156e+07	2.67844	544	59.5965	6.75635
XBXL10_1g12062	XBmRNA22504| zp4.L	43.83	1	11	18	193	176.486	1.91197e+10	1.08336e+08	4.8074e+10	2.72396e+08	2.51436	543	59.233	6.39209
XBXL10_1g41224	XBmRNA77784| zp2.L	31.9	1	17	17	207	351.85	4.6851e+09	1.33156e+07	1.30247e+10	3.70178e+07	2.78003	699	77.6975	8.11865
XBXL10_1g24430	XBmRNA45719| zpax.L	27.07	1	24	24	203	482.406	2.95567e+09	6.12693e+06	8.31031e+09	1.72268e+07	2.81166	905	101.455	6.17627
XBXL10_1g14651	XBmRNA27409| zpy1.L	40.13	1	21	34	212	105.136	2.40431e+09	2.28685e+07	6521343314	6.20274e+07	2.71235	947	107.527	7.06396
XBXL10_1g17460	XBmRNA32202| zpy1.S	38.14	1	18	31	177	118.309	2.3225e+09	1.96308e+07	6.32761e+09	5.34838e+07	2.72448	944	107.215	6.82959
XBXL10_1g33108	XBmRNA62519| hspa1l.S	69.23	4	4	40	353	2078.76	4.86512e+09	2.34039e+06	5.99356e+09	2.88324e+06	1.23194	650	71.1444	5.59229
XBXL10_1g30921	XBmRNA58397| hspa8.L	69.97	5	5	41	348	714.174	4.86512e+09	6.81224e+06	5.99356e+09	8.39229e+06	1.23194	646	70.7481	5.40186
XBXL10_1g35500	XBmRNA67043| hsp70.L	11.98	3	1	8	58	7.10667	4.32645e+09	6.08787e+08	5.38249e+09	7.57385e+08	1.24409	643	70.6811	5.45264
