# Supplementary material for: Impacts of DNA methylation on H2A.Z deposition and nucleosome stability
Source: eLife. 2026 Jul 7;15:RP109762. doi: 10.7554/eLife.109762 (PMC13341117; doi:10.7554/eLife.109762)
Supplement: Supplementary file 5. [file elife-109762-supp5.xlsx]

## Sheet: filtered
								IgG		SRCAP Ab
Accession	Description	ΣCoverage	Σ# Proteins	Σ# Unique Peptides	Σ# Peptides	Σ# PSMs	Estimated Concentration in Egg Extract (nM) (ref [58])	A5: Area (IgG)	Abundance Normalized to Extract Conc	B5: Area (SRCAP Ab)	Abundance Normalized to Extract Conc	Fold Enrichment (Ab/IgG)	# AAs	MW [kDa]	calc. pI
XBXL10_1g19981	XBmRNA36975| ruvbl1.L	64.69	1	7	38	82	126.267	4.16681e+06	32999.9	9.1631e+08	7.2569e+06	219.907	456	50.3044	6.41748
XBXL10_1g22256	XBmRNA41375| ruvbl1.S	64.69	1	5	36	77	572.485	4.16681e+06	7278.46	9.1631e+08	1.60058e+06	219.907	456	50.3575	6.41748
XBXL10_1g33749	XBmRNA63740| ruvbl2.S	59.96	1	3	39	102	654.686	5.56018e+06	8492.9	7.25047e+08	1.10747e+06	130.4	462	51.0953	5.64307
XBXL10_1g31839	XBmRNA60086| ruvbl2.L	59.96	1	2	38	98	47.8087	5.56018e+06	116301	7.25047e+08	1.51656e+07	130.4	462	51.1534	5.64307
XBXL10_1g25820	XBmRNA48288| actl6a.S	44.76	2	4	18	35	118.355	0	0	2.15855e+08	1.82379e+06	>1000	429	47.5934	5.60498
XBXL10_1g23966	XBmRNA44825| LOC108717002 (actl6a.L)	39.86	2	2	16	27	208.693	0	0	2.07178e+08	992744	>1000	429	47.5484	5.50342
XBXL10_1g41491	XBmRNA78297| srcap.L	23.5	1	31	59	88	18.8083	0	0	1.84119e+08	9.78928e+06	>1000	3196	344.156	6.59521
XBXL10_1g44096	XBmRNA82957| srcap.S	21.83	1	29	57	84	2.16736	0	0	1.84119e+08	8.49509e+07	>1000	3110	335.548	6.88818
XBXL10_1g12462	XBmRNA23309| actr6.L	44.95	1	14	14	22	42.3762	0	0	1.49296e+08	3.52312e+06	>1000	396	45.4856	5.07178
XBXL10_1g19188	XBmRNA35464| dmap1.L	59.05	1	37	37	55	70.7635	0	0	1.41662e+08	2.0019e+06	>1000	464	53.1386	9.40771
XBXL10_1g16255	XBmRNA30518| yeats4.S	55.56	2	13	20	27	33.0048	0	0	8.18239e+07	2.47915e+06	>1000	234	27.2932	8.96826
XBXL10_1g12583	XBmRNA23555| yeats4.L	47.58	1	4	11	19	8.45249	0	0	8.13352e+07	9.62263e+06	>1000	227	26.4696	8.39697
XBXL10_1g36808	XBmRNA69432| vps72.L	37.18	1	6	12	24	12.7386	0	0	7.45623e+07	5.85324e+06	>1000	355	40.9006	7.56201
XBXL10_1g38691	XBmRNA73011| vps72.S	37.09	1	6	12	18	17.8863	0	0	5.84169e+07	3.26601e+06	>1000	364	41.4786	6.41748
XBXL10_1g14779	XBmRNA27553| LOC108710511 (znhit1.L)	25.79	1	4	4	6	33.0984	0	0	1.45367e+07	439196	>1000	159	18.421	9.05615
XBXL10_1g23317	XBmRNA43473| pcmt1.L	53.16	1	28	28	171	401.436	1.05968e+09	2.63973e+06	1.66628e+09	4.15079e+06	1.57243	301	32.3226	6.53662
XBXL10_1g12995	XBmRNA24600| pkm.L	43.22	2	10	27	97	4249.88	8901074	2094.43	1.09664e+09	258040	123.203	590	64.1917	6.44287
XBXL10_1g15926	XBmRNA29748| pkm.S	46.49	2	7	23	83	1064.53	8.06674e+06	7577.77	1.09664e+09	1.03017e+06	135.946	527	57.4034	6.49365
XBXL10_1g18217	XBmRNA33562| acta4.L	33.16	8	2	20	78	#N/A	7.1749e+07	#N/A	7.62518e+08	#N/A	#N/A	377	41.9569	5.38916
XBXL10_1g10192	XBmRNA19060| eef1a1o.S	41.65	1	2	26	53	246.473	6.10349e+07	247633	7.03058e+08	2.85247e+06	11.5189	461	50.1923	9.15869
XBXL10_1g7389	XBmRNA13922| eef1a1o.L	42.73	1	2	26	50	1817.12	6.10349e+07	33588.9	7.03058e+08	386909	11.5189	461	50.0913	9.17334
XBXL10_1g39337	XBmRNA74138| aurka.L	60.44	1	17	35	87	90.0523	1.36754e+08	1.51861e+06	6.91993e+08	7.68435e+06	5.06012	407	46.3432	9.45166
XBXL10_1g42523	XBmRNA79939| aurka.S	49.26	1	8	26	72	136.839	1.33223e+08	973571	6.91993e+08	5.05698e+06	5.19426	408	46.4463	9.48096
XBXL10_1g12472	XBmRNA23330| nedd1.L	53.65	1	23	36	95	71.3661	0	0	5.26227e+08	7.37363e+06	>1000	671	73.045	7.73779
XBXL10_1g25607	XBmRNA47820| eef1a1.S	16.45	1	2	12	16	353.374	1.82479e+07	51638.9	5.1839e+08	1.46697e+06	28.4082	462	50.1822	9.01221
XBXL10_1g35194	XBmRNA66445| slc25a5.L	60.4	3	11	32	87	570.492	9.34462e+07	163799	4.36521e+08	765166	4.67136	298	32.9191	9.70068
XBXL10_1g38049	XBmRNA71913| slc25a5.S	56.04	2	7	28	76	2214	3.64972e+07	16484.7	4.36521e+08	197163	11.9604	298	33.085	9.75928
XBXL10_1g38937	XBmRNA73489| krt19.L	25.82	15	3	10	15	334.113	4.72421e+07	141396	4.08218e+08	1.2218e+06	8.64099	426	46.6403	5.21143
XBXL10_1g20873	XBmRNA38460| caprin1.S	32.23	1	12	25	62	371.84	0	0	4.05265e+08	1.08989e+06	>1000	692	77.1665	4.94482
XBXL10_1g42192	XBmRNA79320| krt19.S	20.98	16	2	9	12	376.915	8.65474e+07	229620	3.74937e+08	994752	4.33216	448	48.8843	5.56689
XBXL10_1g37277	XBmRNA70358| pygl.S	62.81	6	32	74	152	1455.69	3.27728e+06	2251.36	3.57464e+08	245563	109.073	855	97.8114	7.60596
XBXL10_1g35898	XBmRNA67821| pygl.L	61.45	6	25	67	131	1617.64	3.27728e+06	2025.96	3.57312e+08	220884	109.027	856	97.9415	7.26904
XBXL10_1g2914	XBmRNA5205| LOC108717216 (mzt2b.L)	50.43	2	6	8	27	43.6776	0	0	3.37311e+08	7.72275e+06	>1000	234	24.5223	9.45166
XBXL10_1g38949	XBmRNA73506| krt12.5.L	12.39	26	1	7	17	#N/A	7.44057e+07	#N/A	331636771	#N/A	#N/A	452	49.3797	5.16064
XBXL10_1g16340	XBmRNA30685| nedd1.S	37.31	1	9	22	41	2.97246	0	0	3.16908e+08	1.06615e+08	>1000	654	71.3892	7.50342
XBXL10_1g37055	XBmRNA69898| pklr.L	9.91	2	1	5	27	604.389	8.75416e+06	14484.3	3.06074e+08	506418	34.9632	545	60.0899	7.2251
XBXL10_1g924	XBmRNA1399| nek1.L	16.45	1	11	22	24	46.6344	0	0	3.05319e+08	6.54708e+06	>1000	1319	148.394	5.23682
XBXL10_1g3883	XBmRNA7102| nek1.S	13.51	1	9	20	22	13.0668	0	0	3.05319e+08	2.33661e+07	>1000	1318	147.81	5.45264
XBXL10_1g38867	XBmRNA73348| pklr.S	8.85	1	1	4	26	521.929	8.75416e+06	16772.7	2.82431e+08	541128	32.2624	531	58.5709	6.41748
XBXL10_1g16248	XBmRNA30494| cct2.S	49.16	1	5	19	34	1925.91	8.71643e+06	4525.88	2.31014e+08	119951	26.5033	535	57.6291	6.21436
XBXL10_1g12589	XBmRNA23574| cct2.L	36.07	1	1	15	28	560.631	8.71643e+06	15547.5	2.31014e+08	412060	26.5033	535	57.6651	6.30322
XBXL10_1g17825	XBmRNA32876| caprin1.L	29.92	1	7	20	32	302.628	2.10205e+06	6945.98	2.23219e+08	737601	106.191	665	74.1751	4.94482
XBXL10_1g17638	XBmRNA32479| psma1.L	44.06	1	2	13	20	1314.68	4.59293e+06	3493.57	2.07553e+08	157873	45.1897	261	29.2667	6.53662
XBXL10_1g21051	XBmRNA38970| psma1.S	42.91	1	1	12	16	362.916	3.74354e+06	10315.2	2.07553e+08	571904	55.4429	261	29.2987	6.44287
XBXL10_1g32459	XBmRNA61267| gapdh.S	36.64	1	4	14	28	3866.03	6.94429e+07	17962.3	2.05668e+08	53198.8	2.96169	333	35.8122	8.04541
XBXL10_1g10873	XBmRNA20453| krt78.4.S	5.42	5	1	3	11	#N/A	1.2101e+08	#N/A	2.0342e+08	#N/A	#N/A	517	56.8628	8.08936
XBXL10_1g5447	XBmRNA10171| mzt2b.S	36.47	2	3	5	9	7.18423	0	0	2.02361e+08	2.81673e+07	>1000	170	17.7351	9.75928
XBXL10_1g15404	XBmRNA28780| ppia.S	45.73	2	9	9	32	5366.99	9.03312e+07	16830.9	1.97993e+08	36890.8	2.19185	164	17.9008	8.35303
XBXL10_1g11942	XBmRNA22297| g3bp1.L	39.36	1	6	16	28	111.56	0	0	1.9238e+08	1.72446e+06	>1000	503	56.2257	5.05908
XBXL10_1g15180	XBmRNA28293| g3bp1.S	38.37	1	5	15	28	410.742	0	0	1.9238e+08	468372	>1000	503	56.14	5.09717
XBXL10_1g4153	XBmRNA7650| g3bp2.S	37.7	1	3	19	53	77.9232	2.77244e+06	35579.2	1.90869e+08	2.44945e+06	68.845	488	54.9104	5.33838
XBXL10_1g1265	XBmRNA2076| g3bp2.L	39	1	3	20	52	360.371	2.77244e+06	7693.31	1.90869e+08	529646	68.845	500	56.317	5.64307
XBXL10_1g28304	XBmRNA53160| 42sp50.L	15.12	1	5	7	8	554.05	0	0	1.85741e+08	335242	>1000	463	50.6459	9.67139
XBXL10_1g7206	XBmRNA13544| nme7.L	44.41	1	7	15	28	60.4717	0	0	1.85151e+08	3.06179e+06	>1000	376	42.3933	7.03467
XBXL10_1g9586	XBmRNA17869| nme7.S	21.01	1	1	9	16	#N/A	0	#N/A	1.85151e+08	#N/A	#N/A	376	42.3423	6.7417
XBXL10_1g22793	XBmRNA42469| LOC108705669	45.73	17	17	17	45	#N/A	2.67901e+07	#N/A	1.83894e+08	#N/A	#N/A	328	36.5033	11.4146
XBXL10_1g28660	XBmRNA53845| map4.S	17.14	1	21	29	38	96.9606	3.21956e+06	33204.8	1.72967e+08	1.78389e+06	53.7238	2234	241.28	5.14795
XBXL10_1g2491	XBmRNA4339| LOC108715337 (zp3.2.L)	17.49	1	7	7	8	254.41	0	0	1.70056e+08	668433	>1000	406	44.9186	6.84424
XBXL10_1g8280	XBmRNA15660| krt8.1.L	55.47	26	21	31	70	757.427	1.06334e+07	14038.8	1.57194e+08	207536	14.783	512	56.3521	5.36377
XBXL10_1g43963	XBmRNA82708| plk1.S	43.14	1	10	28	39	218.854	1.2348e+06	5642.13	1.34626e+08	615140	109.026	598	68.1963	8.82178
XBXL10_1g17851	XBmRNA32974| fnbp4.L	31.15	1	26	26	38	39.2835	0	0	1.27376e+08	3.24249e+06	>1000	915	99.3652	4.75439
XBXL10_1g41301	XBmRNA77927| plk1.L	42.98	1	9	27	33	65.2934	1.2348e+06	18911.6	1.19422e+08	1.829e+06	96.7132	598	68.1833	8.82178
XBXL10_1g27834	XBmRNA52276| thoc1.L	42.39	1	30	30	57	100.61	9.00928e+06	89546.7	1.18087e+08	1.17371e+06	13.1072	670	76.497	4.97021
XBXL10_1g36174	XBmRNA68479| dtd2.L	44.64	1	8	8	11	138.904	0	0	1.1534e+08	830362	>1000	168	18.5845	7.29834
XBXL10_1g10736	XBmRNA20182| atp5f1b.S	63.62	1	6	27	61	4065.33	8.05517e+07	19814.3	1.13906e+08	28018.8	1.41407	525	56.3385	5.40186
XBXL10_1g8084	XBmRNA15295| atp5f1b.L	62.29	1	5	26	56	1156.35	8.07816e+07	69859.3	1.13906e+08	98504.9	1.41005	525	56.3985	5.35107
XBXL10_1g31212	XBmRNA59042| eno1.L	65.21	3	6	29	51	7931.73	1.42198e+07	1792.78	1.13066e+08	14254.8	7.95126	434	47.3422	6.12549
XBXL10_1g33404	XBmRNA63027| eno1.S	55.07	1	2	25	44	1847.36	1.21642e+07	6584.64	1.13066e+08	61203.7	9.29491	434	47.4743	6.23975
XBXL10_1g14381	XBmRNA27095| aurkb.L	29.36	2	8	10	13	141.171	8.01575e+06	56780.6	1.07383e+08	760664	13.3966	361	41.7085	9.46631
XBXL10_1g32894	XBmRNA62115| camk2g.S	23.36	1	1	14	33	226.977	2.46751e+07	108712	1.00043e+08	440762	4.0544	655	72.7548	6.91748
XBXL10_1g30644	XBmRNA57755| camk2g.L	23.39	1	1	14	32	230.453	2.46751e+07	107072	1.00043e+08	434114	4.0544	654	72.6818	7.07861
XBXL10_1g11376	XBmRNA21378| cyb5r3.L	3.65	1	1	1	1	1507.61	0	0	96287841	63868	>1000	301	34.3508	8.79248
XBXL10_1g41026	XBmRNA77406| MGC82602	69.72	6	11	11	22	5879.57	1.85232e+07	3150.44	9.43865e+07	16053.3	5.09557	142	15.6541	5.78271
XBXL10_1g18233	XBmRNA33605| eef1g.L	41.74	1	8	15	29	1506.88	2.84731e+07	18895.4	9.39543e+07	62350.1	3.29975	436	49.8312	7.38623
XBXL10_1g26795	XBmRNA50092| rbm33.L	25.48	1	26	35	70	57.3585	2.46707e+07	430114	9.25888e+07	1.61421e+06	3.75299	1307	146.276	7.06396
XBXL10_1g34122	XBmRNA64361| pqbp1.L	44.66	1	5	8	12	182.834	0	0	9.07317e+07	496253	>1000	206	23.1516	5.17334
XBXL10_1g24614	XBmRNA46003| hadhb.L	43.4	1	4	19	27	599.145	1.15241e+07	19234.3	8.96031e+07	149552	7.77525	470	50.485	9.21729
XBXL10_1g26330	XBmRNA49208| hadhb.S	36.6	1	1	16	24	1910.19	1.15241e+07	6032.98	8.96031e+07	46907.9	7.77525	470	50.478	9.29053
XBXL10_1g37796	XBmRNA71452| hspa5.S	30.38	1	1	18	27	647.383	1.22074e+07	18856.5	8.91825e+07	137758	7.30564	655	72.3745	5.13525
XBXL10_1g20612	XBmRNA37897| eef1g.S	37.76	1	6	13	23	1938.56	1.99991e+07	10316.5	8.58714e+07	44296.5	4.29377	437	50.2043	7.1665
XBXL10_1g4054	XBmRNA7445| camk2d.S	27.75	4	11	14	21	93.1718	1.48373e+07	159247	8.46328e+07	908351	5.70406	537	60.6128	7.44482
XBXL10_1g12864	XBmRNA24308| tubal3.1.L	31.56	2	2	14	28	1992.68	9.67251e+06	4854.03	8.45709e+07	42440.8	8.74343	450	50.0354	5.14795
XBXL10_1g16027	XBmRNA29970| tubal3.1.S	28.67	4	0	13	27	438.719	9.67251e+06	22047.2	8.45709e+07	192768	8.74343	450	50.1675	5.14795
XBXL10_1g3365	XBmRNA6137| atp5f1a.L	45.93	1	5	32	51	1393.64	1.75854e+07	12618.4	8.40749e+07	60327.8	4.78095	553	59.8508	9.1001
XBXL10_1g5885	XBmRNA11014| atp5f1a.S	41.92	1	3	30	45	3410.68	1.75854e+07	5155.99	8.40749e+07	24650.5	4.78095	582	63.1747	9.26123
XBXL10_1g35068	XBmRNA66225| thoc2.L	23.3	1	9	38	45	54.831	7.22186e+06	131711	8.0827e+07	1.47411e+06	11.192	1588	181.863	8.48486
XBXL10_1g37925	XBmRNA71701| thoc2.S	18.74	1	2	31	36	74.5556	7.22186e+06	96865.4	8.0827e+07	1.08412e+06	11.192	1590	181.936	8.52881
XBXL10_1g1810	XBmRNA3220| grhpr.2.L	49.55	2	12	12	25	4108.4	2.34929e+07	5718.27	8.08127e+07	19670.1	3.43987	333	36.0269	6.17627
XBXL10_1g29646	XBmRNA55810| MGC82636 (fabp4.S)	42.96	2	8	8	19	4640.47	9.51301e+06	2050.01	7.90451e+07	17033.9	8.30916	135	15.2818	6.18896
XBXL10_1g38418	XBmRNA72567| pqbp1.S	19.39	1	1	4	6	17.2883	0	0	7.75295e+07	4.48451e+06	>1000	196	22.1541	5.09717
XBXL10_1g18193	XBmRNA33523| bscl2.L	15.54	1	4	6	8	28.3729	0	0	7.61391e+07	2.68351e+06	>1000	341	38.9417	5.68115
XBXL10_1g12865	XBmRNA24309| tubal3.2.L	30.29	2	1	13	25	640.058	1.16068e+07	18134	7.20219e+07	112524	6.20516	449	50.0334	5.09717
XBXL10_1g24836	XBmRNA46352| hsp90ab1.S	30.36	4	4	22	28	2515.61	3.01588e+06	1198.87	7.01818e+07	27898.6	23.2708	728	83.6754	5.07178
XBXL10_1g22805	XBmRNA42481| LOC108716102 (hsp90ab1.,L)	28.83	4	3	21	27	826.676	3.01588e+06	3648.2	7.01818e+07	84896.4	23.2708	725	83.4132	5.03369
XBXL10_1g18988	XBmRNA35012| vtga2.L	26.73	1	42	51	70	711.54	4.88042e+06	6858.95	6.98968e+07	98233.2	14.3219	1807	201.418	9.0415
XBXL10_1g2509	XBmRNA4364| thoc5.L	23.62	1	10	14	20	70.8047	1.65135e+06	23322.6	6.8908e+07	973211	41.7283	690	79.5557	7.13721
XBXL10_1g6361	XBmRNA11950| LOC108707913 (zp4)	19.75	1	13	13	14	121.78	0	0	6.88789e+07	565600	>1000	567	63.6263	6.45557
XBXL10_1g26681	XBmRNA49869| map4.L	9.17	1	10	18	26	146.978	4.19893e+06	28568.4	6.72841e+07	457783	16.0241	2323	251.804	5.08447
XBXL10_1g19580	XBmRNA36241| rpsa.L	28.76	2	9	9	17	17.1742	6.49151e+06	377981	6.66605e+07	3.88144e+06	10.2689	306	34.037	4.90674
XBXL10_1g19883	XBmRNA36780| wbp11.L	39.01	1	4	24	33	15.8601	0	0	6.5497e+07	4.12968e+06	>1000	628	68.575	8.74854
XBXL10_1g22179	XBmRNA41241| wbp11.S	38.43	1	4	24	33	88.5588	0	0	6.5497e+07	739587	>1000	635	69.1542	8.86572
XBXL10_1g41602	XBmRNA78425| thoc6.L	38.44	1	11	11	15	101.555	5.05771e+06	49802.5	6.49498e+07	639551	12.8417	333	37.1081	6.3667
XBXL10_1g33026	XBmRNA62353| vdac2.S	43.26	1	10	11	21	1908.9	9.71152e+06	5087.5	61701643	32323.2	6.35345	282	30.124	7.04932
XBXL10_1g40907	XBmRNA77181| eef1b2.L	45.81	1	10	11	21	3098.1	1.3186e+07	4256.17	6.07784e+07	19618	4.6093	227	25.1316	4.7417
XBXL10_1g5135	XBmRNA9545| thoc5.S	13.77	1	5	9	11	12.9724	0	0	5.96315e+07	4.5968e+06	>1000	690	79.2182	6.55127
XBXL10_1g24613	XBmRNA46002| hadha.L	42.89	1	7	31	51	976.182	1.63801e+07	16779.8	5.83682e+07	59792.3	3.56336	760	82.1681	8.95361
XBXL10_1g26329	XBmRNA49207| hadha.S	40.26	1	5	29	46	1824.33	1.63801e+07	8978.7	5.83682e+07	31994.3	3.56336	760	82.3072	8.93896
XBXL10_1g18989	XBmRNA35013| LOC108714181	21.81	1	29	38	47	1537.11	3.14658e+06	2047.08	5.78511e+07	37636.3	18.3854	1816	202.22	9.1001
XBXL10_1g32116	XBmRNA60512| fbl.L	33.64	1	3	10	23	196.092	9.6451e+06	49186.5	5.74193e+07	292817	5.95321	330	34.741	10.2427
XBXL10_1g17749	XBmRNA32706| ckap5.L	27.74	1	21	47	51	163.717	0	0	5.69714e+07	347986	>1000	2073	229.297	8.19189
XBXL10_1g12071	XBmRNA22521| hspa9.L	4.93	2	2	3	4	1614.09	3.25838e+07	20187.1	5.60901e+07	34750.3	1.72141	670	72.5152	5.92236
XBXL10_1g17940	XBmRNA33152| fen1.L	39.53	2	14	14	23	505.749	0	0	5.58867e+07	110503	>1000	382	42.6412	7.94287
XBXL10_1g1428	XBmRNA2470| eef2.1.L	33.45	3	8	26	42	958.44	1.06049e+07	11064.8	5.56015e+07	58012.5	5.24299	858	95.3659	6.93213
XBXL10_1g4292	XBmRNA7966| eef2.1.S	32.52	3	7	25	36	1896.65	1.06049e+07	5591.39	5.56015e+07	29315.6	5.24299	858	95.4619	6.82959
XBXL10_1g22362	XBmRNA41614| thoc7.S	56.22	1	7	16	29	50.8987	3.81409e+06	74935	5.53545e+07	1.08754e+06	14.5131	201	23.3568	5.68115
XBXL10_1g20107	XBmRNA37257| LOC108714731	35.59	1	2	11	21	99.933	4.15459e+06	41573.8	5.53545e+07	553916	13.3237	222	25.6219	6.04932
XBXL10_1g12355	XBmRNA23085| thoc3.L	24.14	1	9	9	12	71.694	1.50827e+06	21037.7	5.11351e+07	713241	33.9031	319	35.8714	5.8208
XBXL10_1g8258	XBmRNA15611| pcbp3.L	43.91	5	11	11	18	#N/A	6.12605e+06	#N/A	5.04876e+07	#N/A	#N/A	353	37.136	7.72314
XBXL10_1g38999	XBmRNA73576| cdk12.L	1.09	42	1	2	3	46.9435	2.38241e+06	50750.7	4.97406e+07	1.05959e+06	20.8782	1466	162.557	9.30518
XBXL10_1g32340	XBmRNA60962| LOC108697909	16.46	7	2	2	3	#N/A	9.64457e+06	#N/A	4.95302e+07	#N/A	#N/A	243	25.4794	7.47412
XBXL10_1g3410	XBmRNA6228| vcp.L	47.33	2	7	44	66	276.018	7.7801e+06	28186.9	4.88096e+07	176835	6.27365	805	89.2286	5.30029
XBXL10_1g5918	XBmRNA11089| vcp.S	46.96	2	6	43	65	1739.92	8.98466e+06	5163.84	4.88096e+07	28052.8	5.43255	805	89.1236	5.30029
XBXL10_1g30025	XBmRNA56526| dclre1a.L	19.55	1	13	13	19	64.4988	6.73143e+06	104365	4.7907e+07	742757	7.11691	941	104.478	8.92432
XBXL10_1g17828	XBmRNA32880| cat.2.L	51.7	4	9	22	31	370.326	0	0	4.75125e+07	128299	>1000	528	60.2078	7.63525
XBXL10_1g15098	XBmRNA28155| ldhb.S	29.64	2	10	10	17	5522.49	2.01285e+07	3644.81	4.67431e+07	8464.13	2.32224	334	36.3942	6.93213
XBXL10_1g34782	XBmRNA65761| rps4x.L	30.42	2	11	11	13	3446.86	3.10253e+06	900.103	4.6659e+07	13536.7	15.039	263	29.63	10.1548
XBXL10_1g34538	XBmRNA65269| apex2.L	1.55	1	1	1	1	21.6769	0	0	4.62849e+07	2.13522e+06	>1000	517	57.6897	7.82568
XBXL10_1g33927	XBmRNA64008| fbl.S	33.75	1	3	10	17	22.8703	7.63545e+06	333859	4.62148e+07	2.02074e+06	6.05267	323	34.3288	10.1694
XBXL10_1g6992	XBmRNA13089| tuba5.L	27.39	1	3	10	15	449.487	0	0	4.60911e+07	102542	>1000	449	49.9475	5.14795
XBXL10_1g39176	XBmRNA73857| eftud2.L	2.36	2	1	2	3	348.742	0	0	4.59817e+07	131850	>1000	974	109.707	4.94482
XBXL10_1g20876	XBmRNA38468| cat.2.S	45.83	3	4	17	24	511.983	0	0	4.58161e+07	89487.6	>1000	528	59.8997	7.66455
XBXL10_1g8806	XBmRNA16507| rps3.L	65.45	1	1	16	20	3703.89	5.13393e+06	1386.09	4.44124e+07	11990.7	8.65075	246	26.9846	9.65674
XBXL10_1g11185	XBmRNA21011| rps3.S	65.45	1	1	16	20	404.778	4.54064e+06	11217.6	4.44124e+07	109720	9.78107	246	26.9986	9.65674
XBXL10_1g28391	XBmRNA53339| eef1d.L	10.35	2	8	9	15	579.053	1.22516e+07	21158	4.34362e+07	75012.5	3.54535	715	78.9545	6.50732
XBXL10_1g28731	XBmRNA53999| rbm33.S	20.24	1	15	24	40	4.87096	8.70503e+06	1.78713e+06	4.32282e+07	8.87467e+06	4.96588	1309	146.701	7.12256
XBXL10_1g30123	XBmRNA56694| tpi1.L	43.55	2	6	11	19	3348.74	6.59199e+06	1968.5	4.29163e+07	12815.7	6.51037	248	26.8629	7.00537
XBXL10_1g40211	XBmRNA75663| ndel1.L	24.86	2	2	10	14	4.30795	1.85706e+07	4.31077e+06	4.28233e+07	9.94054e+06	2.30598	350	39.144	5.38916
XBXL10_1g34963	XBmRNA66046| nono.L	37.07	2	19	20	27	231.394	4.12469e+06	17825.4	4.17101e+07	180256	10.1123	464	53.1536	8.67529
XBXL10_1g32442	XBmRNA61199| tpi1.S	33.87	1	3	8	16	5796.81	6.07076e+06	1047.26	4.127e+07	7119.43	6.79816	248	26.7448	7.35693
XBXL10_1g4126	XBmRNA7594| hpgds.S	23.47	2	6	6	7	3643	6.62782e+06	1819.33	4.11423e+07	11293.5	6.20752	196	22.5807	6.25244
XBXL10_1g2661	XBmRNA4664| snrpd3.L	22.22	2	4	4	6	188.784	4.41917e+06	23408.6	4.11216e+07	217823	9.30528	126	13.9073	10.3159
XBXL10_1g20640	XBmRNA37997| MGC131138	17.95	1	5	7	11	17.3589	0	0	4.08022e+07	2.3505e+06	>1000	351	39.739	6.53662
XBXL10_1g18831	XBmRNA34720| gpi.L	52.62	2	9	20	31	3380.85	5.17488e+06	1530.64	4.07711e+07	12059.4	7.87866	553	61.9185	7.34229
XBXL10_1g21389	XBmRNA39587| gpi.S	28.57	2	3	14	22	1486.55	3.70441e+06	2491.95	4.07711e+07	27426.7	11.0061	553	62.1037	7.50342
XBXL10_1g9362	XBmRNA17488| eif2s3.S	25.21	2	2	9	13	202.163	0	0	4.062e+07	200927	>1000	472	51.2653	8.27979
XBXL10_1g6616	XBmRNA12407| eif2s3.L	22.88	2	1	8	12	621.431	0	0	4.062e+07	65365.3	>1000	472	51.2163	8.27979
XBXL10_1g14649	XBmRNA27406| slc25a11.L	63.93	1	2	18	29	1444.33	1.20927e+07	8372.54	4.0339e+07	27929.3	3.33582	305	33.5743	9.80322
XBXL10_1g17459	XBmRNA32201| slc25a11.S	61.31	1	1	17	27	147.114	6.91593e+06	47010.7	4.0339e+07	274202	5.83276	305	33.5873	9.90576
XBXL10_1g18990	XBmRNA35014| vtgb1.L	16.95	1	14	25	32	1194.85	2.93145e+06	2453.41	3.95329e+07	33086.2	13.4858	1817	202.99	8.93896
XBXL10_1g13547	XBmRNA25743| MGC85536	46.09	4	3	4	4	#N/A	0	#N/A	3.92714e+07	#N/A	#N/A	128	13.5005	10.5796
XBXL10_1g34190	XBmRNA64494| rpl12.L	29.09	2	4	4	7	1934.9	1.24855e+07	6452.79	3.90135e+07	20163	3.1247	165	17.7555	9.14404
XBXL10_1g10049	XBmRNA18783| sfpq.S	33.28	2	10	21	27	142.123	2.94773e+06	20740.7	3.87499e+07	272651	13.1457	661	74.681	9.51025
XBXL10_1g43184	XBmRNA81194| ndel1.S	23.32	2	2	10	14	16.0452	1.85706e+07	1.15739e+06	3.86457e+07	2.40855e+06	2.08102	373	42.2027	5.85889
XBXL10_1g41098	XBmRNA77557| nde1.L	12.61	2	1	4	7	#N/A	1.07424e+07	#N/A	3.86457e+07	#N/A	#N/A	349	39.6859	5.03369
XBXL10_1g28333	XBmRNA53230| rplp1.L	51.33	2	2	2	3	2235.37	0	0	3.84016e+07	17179.1	>1000	113	11.4366	4.28467
XBXL10_1g43735	XBmRNA82329| kpna7.S	19.35	1	3	9	20	866.952	6.69612e+06	7723.75	3.81467e+07	44000.9	5.69684	522	57.652	5.41455
XBXL10_1g27954	XBmRNA52479| rps20.L	31.93	1	3	5	9	1181.97	1.0229e+07	8654.2	3.80564e+07	32197.3	3.72043	119	13.3473	9.93506
XBXL10_1g8016	XBmRNA15158| LOC108708554	44.57	1	24	24	29	9.3778	9.97863e+06	1.06407e+06	3.78822e+07	4.03956e+06	3.79633	691	74.9279	9.1001
XBXL10_1g28137	XBmRNA52839| decr1.L	34.44	1	11	11	17	671.918	5.78686e+06	8612.45	3.78721e+07	56364.2	6.5445	331	35.4752	8.73389
XBXL10_1g39180	XBmRNA73863| psmd11.L	35.55	2	15	15	20	144.808	2.99588e+06	20688.7	3.74974e+07	258946	12.5163	422	47.3271	6.72705
XBXL10_1g42263	XBmRNA79441| kpnb1.S	33.11	1	2	24	35	256.372	1.6891e+07	65884.7	3.73861e+07	145827	2.21337	876	97.0988	4.79248
XBXL10_1g39034	XBmRNA73621| LOC108700788	30.94	1	1	23	34	1128.44	1.6891e+07	14968.4	3.73861e+07	33130.7	2.21337	876	97.0668	4.79248
XBXL10_1g42049	XBmRNA79058| aldoa.L	42.86	2	2	16	29	469.156	6.30411e+06	13437.1	3.68031e+07	78445.2	5.83795	364	39.3814	8.29443
XBXL10_1g44362	XBmRNA83374| aldoa.S	44.51	2	4	18	28	3707.27	6.8113e+06	1837.28	3.68031e+07	9927.27	5.40324	364	39.3614	8.29443
XBXL10_1g19657	XBmRNA36365| mgst3.L	53.74	1	6	7	12	1652.5	3.26207e+06	1974.02	3.67118e+07	22215.9	11.2542	147	16.2124	9.39307
XBXL10_1g40997	XBmRNA77338| kpna7.L	21.61	1	2	8	17	987.457	6.69612e+06	6781.18	3.63789e+07	36841	5.43283	523	57.7721	5.33838
XBXL10_1g43819	XBmRNA82481| rps15a.S	47.1	2	7	7	9	#N/A	1.46625e+06	#N/A	3.58465e+07	#N/A	#N/A	138	15.6914	10.1108
XBXL10_1g34688	XBmRNA65567| tktl2.L	32	3	18	18	22	2503.13	9.4723e+06	3784.19	3.58273e+07	14313	3.78232	625	67.4088	6.72705
XBXL10_1g37706	XBmRNA71257| cdk9.S	34.04	42	5	11	12	8.2143	2.38241e+06	290032	3.57842e+07	4.35633e+06	15.0201	376	43.1963	9.0415
XBXL10_1g34580	XBmRNA65334| cdk9.L	27.82	42	2	8	9	35.1737	2.38241e+06	67732.8	3.57842e+07	1.01736e+06	15.0201	381	43.8537	8.96826
XBXL10_1g13421	XBmRNA25470| rpl4.L	36.36	1	1	14	20	435.213	3.00265e+06	6899.28	3.45457e+07	79376.6	11.5051	396	44.8806	11.0776
XBXL10_1g15539	XBmRNA29040| rpl4.S	36.66	1	1	14	20	3045.13	3.00265e+06	986.05	3.45457e+07	11344.6	11.5051	401	45.3968	10.9897
XBXL10_1g21068	XBmRNA38995| rps13.S	50.33	1	8	10	13	2153.55	2.98255e+06	1384.94	3.42621e+07	15909.5	11.4875	151	17.2397	10.6089
XBXL10_1g14242	XBmRNA26868| prdx2.L	29.21	2	5	6	8	2582.83	7.71027e+06	2985.21	3.37683e+07	13074.1	4.37965	202	22.4126	7.00537
XBXL10_1g2611	XBmRNA4564| rplp0.L	36.62	2	11	11	18	342.854	0	0	3.37346e+07	98393.4	>1000	314	34.0496	5.56689
XBXL10_1g13052	XBmRNA24732| rps17.L	52.59	1	5	5	12	#N/A	6.9677e+06	#N/A	3.36412e+07	#N/A	#N/A	135	15.5144	9.84717
XBXL10_1g17120	XBmRNA31731| LOC121402261	46.83	15	6	6	7	#N/A	3.23651e+06	#N/A	3.33671e+07	#N/A	#N/A	126	13.9256	10.3159
XBXL10_1g19176	XBmRNA35440| kif2c.L	42.6	1	8	28	30	133.684	0	0	3.32225e+07	248515	>1000	730	82.6754	7.84033
XBXL10_1g13736	XBmRNA26129| vdac3.L	26.67	1	7	7	12	1373.89	4.47184e+06	3254.88	3.3177e+07	24148.3	7.41909	300	32.1254	9.34912
XBXL10_1g29557	XBmRNA55618| rps20.S	26.05	1	1	3	5	2383.11	1.17283e+07	4921.44	3.29172e+07	13812.7	2.80664	119	13.3353	9.93506
XBXL10_1g6511	XBmRNA12203| aldoc.L	41.21	2	9	11	18	2543.16	1.01194e+07	3979.08	3.26864e+07	12852.7	3.23006	364	39.2479	6.53662
XBXL10_1g29537	XBmRNA55577| LOC108695289	29.13	1	10	10	15	22.709	4.58351e+06	201837	3.187e+07	1.40341e+06	6.95318	357	40.8527	5.68115
XBXL10_1g36363	XBmRNA68728| eif2s1.L	32.81	1	2	10	11	737.985	2.17511e+06	2947.36	3.18676e+07	43181.9	14.651	317	36.3966	5.04639
XBXL10_1g38542	XBmRNA72746| eif2s1.S	26.67	1	1	9	10	272.305	2.17511e+06	7987.76	3.18676e+07	117029	14.651	315	36.0224	5.04639
XBXL10_1g34983	XBmRNA66095| LOC108698339	17.56	1	21	21	28	79.3976	3.54532e+06	44652.7	31535943	397190	8.8951	1344	143.795	5.12256
XBXL10_1g3936	XBmRNA7199| rps3a.S	35.23	2	10	10	15	1235.57	0	0	3.07781e+07	24910	>1000	264	29.9218	9.71533
XBXL10_1g33984	XBmRNA64098| ddost.S	21.69	1	1	7	9	339.131	2.17233e+06	6405.58	3.04833e+07	89886.4	14.0325	438	48.6819	5.59229
XBXL10_1g15033	XBmRNA27998| rtcb.S	36.04	1	7	15	22	572.402	4.94611e+06	8640.96	3.00754e+07	52542.4	6.08061	505	55.2157	7.23975
XBXL10_1g19734	XBmRNA36517| tptep20csnk1e.L	39.9	3	3	15	22	45.4529	1.32758e+07	292078	2.98954e+07	657722	2.25187	416	47.2852	9.65674
XBXL10_1g22069	XBmRNA41030| tptep20csnk1e.S	39.42	3	3	15	22	#N/A	1.34359e+07	#N/A	2.98954e+07	#N/A	#N/A	416	47.2712	9.65674
XBXL10_1g21641	XBmRNA40137| kif2c.S	39.73	1	6	26	28	63.6371	0	0	2.96891e+07	466538	>1000	730	82.5342	7.85498
XBXL10_1g8203	XBmRNA15514| senp1.L	34.42	1	14	17	22	7.71309	2.56457e+06	332496	2.93936e+07	3.81087e+06	11.4614	616	70.209	9.23193
XBXL10_1g42548	XBmRNA79984| psma7.S	45.34	2	8	8	9	#N/A	0	#N/A	2.8977e+07	#N/A	#N/A	247	27.9177	8.5874
XBXL10_1g8020	XBmRNA15162| spats2.L	36.01	1	9	15	17	199.951	0	0	2.88121e+07	144095	>1000	547	60.1439	8.99756
XBXL10_1g12445	XBmRNA23279| hsp90b1.L	14.66	1	4	13	15	1904.97	0	0	2.8799e+07	15117.9	>1000	805	92.6505	4.81787
XBXL10_1g16360	XBmRNA30722| hsp90b1.S	10.68	1	1	10	12	915.287	0	0	2.8799e+07	31464.5	>1000	805	92.9266	4.81787
XBXL10_1g10684	XBmRNA20069| spats2.S	30.16	1	5	11	15	27.094	0	0	2.87833e+07	1.06235e+06	>1000	547	59.9169	9.0415
XBXL10_1g32924	XBmRNA62197| ccser2.S	34.91	1	24	32	41	2.85082	5.74286e+06	2.01446e+06	2.87542e+07	1.00863e+07	5.00694	1100	122.971	8.23584
XBXL10_1g13876	XBmRNA26381| dnajb1.L	33.43	5	10	10	16	193.008	1.16156e+07	60181.9	2.8709e+07	148745	2.47159	347	38.2583	8.32373
XBXL10_1g6709	XBmRNA12572| pafah1b1.L	38.54	2	16	16	18	#N/A	0	#N/A	2.87014e+07	#N/A	#N/A	410	46.7472	7.37158
XBXL10_1g35387	XBmRNA66801| rack1.L	26.5	1	9	9	11	2129.61	2.57962e+06	1211.31	2.81488e+07	13217.8	10.912	317	35.0465	7.69385
XBXL10_1g16330	XBmRNA30661| rps16.S	35.1	2	5	5	5	3791.21	0	0	2.79616e+07	7375.38	>1000	151	16.9242	10.1401
XBXL10_1g21820	XBmRNA40487| rpl5.S	33.78	1	4	11	14	2651	0	0	2.7538e+07	10387.8	>1000	296	34.0898	9.64209
XBXL10_1g21994	XBmRNA40867| mgst3.S	34.69	1	2	3	8	771.747	6.70524e+06	8688.39	2.73212e+07	35401.8	4.0746	147	16.3384	9.42236
XBXL10_1g34982	XBmRNA66094| LOC108698338	18.89	1	18	18	24	27.1108	3.44967e+06	127244	2.72243e+07	1.00419e+06	7.89186	974	107.069	9.01221
XBXL10_1g32438	XBmRNA61189| phb2.S	68.11	2	19	19	26	1245.75	1.34995e+07	10836.4	2.71002e+07	21754.1	2.00749	301	33.3339	9.90576
XBXL10_1g35405	XBmRNA66853| rps18.L	48.34	2	9	9	11	#N/A	8.97986e+06	#N/A	2.70787e+07	#N/A	#N/A	151	17.5348	10.8726
XBXL10_1g7231	XBmRNA13583| sfpq.L	17.27	1	2	12	15	21.2454	3.11586e+06	146661	26806006	1.26173e+06	8.60307	660	74.3119	9.40771
XBXL10_1g18615	XBmRNA34264| cdk10.L	9.14	42	2	3	4	29.5599	2.38241e+06	80596.2	2.68005e+07	906652	11.2493	350	39.6287	8.89502
XBXL10_1g42781	XBmRNA80429| alyref.S	54.69	2	10	10	19	195.69	1.08324e+07	55355.1	2.67911e+07	136906	2.47324	256	27.1589	11.1362
XBXL10_1g6367	XBmRNA11963| h2ac17.L	28.06	21	2	3	4	104.669	0	0	2.64532e+07	252732	>1000	139	14.855	10.0962
XBXL10_1g42925	XBmRNA80661| rpn2.S	13.85	1	2	6	9	303.04	1.27303e+07	42008.6	2.64382e+07	87243.3	2.0768	650	71.2778	5.36377
XBXL10_1g39899	XBmRNA75036| rpn2.L	10.92	1	1	5	7	735.323	1.27303e+07	17312.5	2.64382e+07	35954.6	2.0768	650	71.3217	5.36377
XBXL10_1g32516	XBmRNA61345| cdk1.S	36.42	45	3	10	12	190.395	2.38241e+06	12513	2.64111e+07	138718	11.0859	302	34.4842	8.27979
XBXL10_1g43247	XBmRNA81305| LOC108702869	32.28	1	9	9	11	3127.71	7.49024e+06	2394.8	2.64068e+07	8442.84	3.52549	158	18.4089	10.4038
XBXL10_1g7079	XBmRNA13254| psma5.L	14.52	1	1	2	2	917.334	0	0	2.61411e+07	28496.8	>1000	241	26.1791	4.91943
XBXL10_1g1782	XBmRNA3160| trmo.L	18.27	1	9	9	9	2.94329	0	0	2.60861e+07	8.8629e+06	>1000	405	45.7949	7.1958
XBXL10_1g39957	XBmRNA75126| ahcy.L	33.49	2	1	13	20	639.181	4.36003e+06	6821.27	2.60285e+07	40721.6	5.9698	433	47.7163	6.48096
XBXL10_1g42972	XBmRNA80768| ahcy.S	33.49	2	1	13	20	3559.26	4.36003e+06	1224.98	2.60285e+07	7312.89	5.9698	433	47.7143	6.40479
XBXL10_1g11509	XBmRNA21595| rtcb.L	20.99	1	1	9	12	153.678	2.51255e+06	16349.5	2.5911e+07	168606	10.3126	505	55.0936	6.87354
XBXL10_1g30210	XBmRNA56892| cdk1.L	29.8	45	1	8	9	273.053	2.38241e+06	8725.08	25887886	94808.9	10.8662	302	34.5201	7.95752
XBXL10_1g35394	XBmRNA66817| rps5.L	29.56	1	1	7	10	2300.13	4.45539e+06	1937.02	2.58053e+07	11219.1	5.79191	203	22.729	9.74463
XBXL10_1g29616	XBmRNA55761| LOC108695345	37.4	3	10	10	15	1500.44	2.78792e+06	1858.06	2.56891e+07	17121.1	9.21446	246	28.7302	10.6675
XBXL10_1g28735	XBmRNA54006| dnajb6.S	26.92	1	4	8	13	#N/A	1.81491e+07	#N/A	2.55535e+07	#N/A	#N/A	338	37.148	7.54736
XBXL10_1g9675	XBmRNA18030| rps10.S	18.79	1	1	3	4	215.375	0	0	2.54803e+07	118307	>1000	165	18.8989	10.1108
XBXL10_1g12943	XBmRNA24511| LOC108711268	29.65	3	23	23	31	768.438	7.07015e+06	9200.68	2.54e+07	33054	3.59256	904	100.996	6.75635
XBXL10_1g7099	XBmRNA13303| rps10.L	22.78	1	2	4	5	1955.86	0	0	2.52455e+07	12907.7	>1000	180	20.6719	10.272
XBXL10_1g8013	XBmRNA15151| tuba1c.L	35.41	16	1	13	19	244.38	0	0	2.5091e+07	102672	>1000	449	49.8475	5.09717
XBXL10_1g31927	XBmRNA60251| LOC108695923	3.21	2	2	2	2	#N/A	0	#N/A	2.45058e+07	#N/A	#N/A	592	68.1838	7.44482
XBXL10_1g10085	XBmRNA18847| LOC121400351	12.16	1	1	1	1	#N/A	0	#N/A	2.44349e+07	#N/A	#N/A	148	16.583	10.5649
XBXL10_1g19401	XBmRNA35867| rpl5.L	29.73	1	2	9	10	643.131	0	0	2.43449e+07	37853.7	>1000	296	33.9799	9.68604
XBXL10_1g39134	XBmRNA73777| phb.L	51.1	2	7	14	19	1186.93	1.04971e+07	8843.9	2.43152e+07	20485.8	2.31637	272	29.8318	5.41455
XBXL10_1g21186	XBmRNA39238| gan.S	17.55	2	10	10	11	#N/A	0	#N/A	2.40828e+07	#N/A	#N/A	604	67.8666	5.32568
XBXL10_1g7561	XBmRNA14207| cct6a.L	29.76	1	3	13	19	2112.39	6.18158e+06	2926.35	2.39809e+07	11352.5	3.87941	531	57.6505	6.75635
XBXL10_1g43356	XBmRNA81520| tuba4b.S	27.88	2	0	10	16	781.55	0	0	2.3942e+07	30634	>1000	452	50.3495	5.05908
XBXL10_1g35209	XBmRNA66467| utp14a.L	43.4	1	26	26	29	38.4069	0	0	2.38003e+07	619689	>1000	765	87.6222	5.98584
XBXL10_1g5281	XBmRNA9824| hic2.S	9.96	2	4	4	6	12.3298	0	0	2.37108e+07	1.92305e+06	>1000	562	62.7497	7.28369
XBXL10_1g17705	XBmRNA32627| hsd17b12.L	10.06	1	1	3	3	122.846	0	0	2.30696e+07	187793	>1000	318	35.0005	9.45166
XBXL10_1g44267	XBmRNA83202| nme2.S	35.71	3	1	5	9	5301.34	1.26906e+07	2393.85	2.30456e+07	4347.12	1.81596	154	17.4909	6.56592
XBXL10_1g4392	XBmRNA8173| cirbp.S	54.22	1	6	10	15	4137.66	7.32401e+06	1770.09	2.30182e+07	5563.09	3.14284	166	17.8443	9.12939
XBXL10_1g1559	XBmRNA2765| cirbp.L	35.54	1	3	7	9	1939.67	7.78335e+06	4012.72	2.30182e+07	11867.1	2.95736	166	17.8923	9.17334
XBXL10_1g39861	XBmRNA74981| snrpb.L	18.8	3	4	4	4	15.9527	0	0	2.3004e+07	1.44202e+06	>1000	234	23.9473	11.2095
XBXL10_1g30346	XBmRNA57164| MGC82327	34.44	3	10	10	13	2421.76	1.84785e+06	763.02	2.29483e+07	9475.89	12.4189	241	27.5791	6.3667
XBXL10_1g7185	XBmRNA13498| rpl8.L	18.29	2	6	6	6	3302	0	0	2.2804e+07	6906.11	>1000	257	27.9002	10.8872
XBXL10_1g38240	XBmRNA72238| rps5.S	29.56	1	1	7	10	#N/A	4.45539e+06	#N/A	2.2785e+07	#N/A	#N/A	203	22.745	9.74463
XBXL10_1g505	XBid49| LOC108696225	5.74	2	1	1	1	#N/A	0	#N/A	2.27798e+07	#N/A	#N/A	122	13.3625	6.75635
XBXL10_1g10285	XBmRNA19229| cct6a.S	30.13	1	3	13	19	479.383	6.18158e+06	12894.9	2.27474e+07	47451.3	3.67986	531	57.7505	6.68311
XBXL10_1g43703	XBmRNA82267| cfap410.S	30.08	1	6	6	7	92.4892	0	0	2.27279e+07	245736	>1000	256	29.19	5.97314
XBXL10_1g35937	XBmRNA67934| ckb.L	29.4	3	3	8	10	2442.76	1.15049e+07	4709.77	2.2717e+07	9299.72	1.97456	381	42.5424	6.30322
XBXL10_1g37250	XBmRNA70294| ckb.S	29.13	3	5	10	12	3922.61	1.15049e+07	2932.96	2.26724e+07	5779.92	1.97068	381	42.5196	6.354
XBXL10_1g37749	XBmRNA71348| LOC108699999	24.09	7	11	48	58	286.17	8.01535e+06	28009	2.26347e+07	79095.2	2.82392	2644	281.397	5.87158
XBXL10_1g34506	XBmRNA65203| LOC108704467	24.05	7	9	46	56	685.668	8.01535e+06	11689.8	2.26347e+07	33011.1	2.82392	2644	281.308	5.90967
XBXL10_1g33308	XBmRNA62847| ddx6.S	25.99	2	8	8	8	153.444	387568	2525.8	2.26331e+07	147501	58.3978	481	54.1332	8.86572
XBXL10_1g21498	XBmRNA39801| vtgb1.S	16.44	1	17	27	33	387.718	3.55266e+06	9163	2.24903e+07	58007	6.33057	1800	200.802	8.90967
XBXL10_1g32222	XBmRNA60712| ddost.L	20.61	1	1	7	8	454.097	2.3859e+06	5254.18	2.19228e+07	48277.9	9.18848	461	51.2272	5.84619
XBXL10_1g28942	XBmRNA54446| igf2bp3.S	38.28	1	4	20	24	99.1831	2.52431e+06	25451.1	2.18852e+07	220655	8.66976	593	65.3451	8.99756
XBXL10_1g27048	XBmRNA50670| igf2bp3.L	32.66	1	1	17	21	853.948	2.52431e+06	2956.05	2.18852e+07	25628.3	8.66976	594	65.6023	8.92432
XBXL10_1g25198	XBmRNA47040| tcp1.S	28.65	1	3	16	22	2063.56	6.22412e+06	3016.2	2.18832e+07	10604.6	3.51587	555	60.0604	6.31592
XBXL10_1g23064	XBmRNA42991| tcp1.L	28.47	1	2	15	21	294.723	5.92529e+06	20104.6	2.18832e+07	74249.9	3.69318	555	60.0876	6.21436
XBXL10_1g40515	XBmRNA76227| tuba4b.L	24.11	2	0	8	12	11.835	0	0	2.18746e+07	1.8483e+06	>1000	448	49.8553	5.05908
XBXL10_1g3394	XBmRNA6193| vwa5a.2.L	16.96	1	12	12	16	1484.47	3.39659e+06	2288.07	2.17094e+07	14624.3	6.39153	861	94.4042	4.81787
XBXL10_1g41890	XBmRNA78850| nme2.L	38.31	3	1	5	9	4105.85	1.26906e+07	3090.85	2.16788e+07	5279.98	1.70826	154	17.4778	6.56592
XBXL10_1g16147	XBmRNA30264| wasl.S	20.97	2	9	9	11	72.5061	0	0	2.1676e+07	298954	>1000	515	56.1112	8.6167
XBXL10_1g40814	XBmRNA76904| atic.L	24.79	2	12	12	13	2032.23	1.69929e+06	836.171	2.16229e+07	10640	12.7246	589	63.7876	6.55127
XBXL10_1g26806	XBmRNA50107| dnajb6.L	17.29	1	2	6	10	83.4949	6.65396e+06	79693.1	2.1469e+07	257129	3.22649	347	37.9633	7.57666
XBXL10_1g21616	XBmRNA40108| prdx1.S	15.58	2	1	2	3	413.259	1.17561e+07	28447.4	2.1424e+07	51841.5	1.82237	199	22.3163	5.96045
XBXL10_1g33833	XBmRNA63888| rps19.S	51.31	1	3	12	19	3301.56	3.23611e+06	980.176	2.13625e+07	6470.43	6.60129	191	21.2452	10.2866
XBXL10_1g42365	XBmRNA79599| phb.S	43.75	1	6	13	15	1707.83	7.36124e+06	4310.28	2.13525e+07	12502.7	2.90067	272	29.8158	5.41455
XBXL10_1g7224	XBmRNA13570| psmb2.L	25.63	2	4	4	6	856.668	5.29066e+06	6175.86	2.11058e+07	24637.1	3.98926	199	22.5946	6.55127
XBXL10_1g42707	XBmRNA80294| cox4i2.S	30.46	2	3	3	7	1320.63	8.25488e+06	6250.7	2.08086e+07	15756.5	2.52076	174	20.5326	9.36377
XBXL10_1g27259	XBmRNA51050| acad11.L	19.83	2	13	13	15	80.0913	0	0	2.0808e+07	259804	>1000	817	91.8136	8.32373
XBXL10_1g10191	XBmRNA19059| rpl11.S	25.99	3	5	5	7	2878.96	4.06782e+06	1412.95	2.07393e+07	7203.74	5.09838	177	20.1647	9.78857
XBXL10_1g35205	XBmRNA66462| pgk1.L	16.31	1	1	6	6	3904.69	0	0	2.0547e+07	5262.14	>1000	417	44.554	7.06396
XBXL10_1g26238	XBmRNA49054| pgk1	15.59	2	1	6	6	#N/A	0	#N/A	2.0547e+07	#N/A	#N/A	417	44.6249	6.87354
XBXL10_1g41590	XBmRNA78400| elob.L	38.66	2	3	3	4	83.423	1.81624e+07	217714	2.04973e+07	245703	1.12856	119	13.3017	5.12256
XBXL10_1g22926	XBmRNA42721| xrn2.L	23.74	2	17	17	23	64.0338	6.68202e+06	104351	2.01959e+07	315393	3.02242	931	107.375	7.26904
XBXL10_1g31130	XBmRNA58895| LOC398563 (ppp2r1b.L)	27.16	3	1	12	13	229.21	0	0	2.0181e+07	88045.7	>1000	589	65.347	5.021
XBXL10_1g19569	XBmRNA36209| poldip3.L	44.78	1	12	17	23	178.96	5.16632e+06	28868.6	2.01386e+07	112531	3.89805	431	47.2941	10.0083
XBXL10_1g23784	XBmRNA44430| psmd2.L	23.19	1	1	17	22	626.206	6.23722e+06	9960.33	2.01286e+07	32143.8	3.22718	897	99.2734	5.26221
XBXL10_1g25673	XBmRNA47991| psmd2.S	23.19	1	1	17	22	203.833	6.23722e+06	30599.6	2.01286e+07	98750.4	3.22718	897	99.2542	5.23682
XBXL10_1g21639	XBmRNA40135| rps8.S	28.37	2	5	5	6	167.39	0	0	2.01229e+07	120216	>1000	208	24.0851	10.3452
XBXL10_1g10235	XBmRNA19144| mdh2.S	50	2	3	13	15	4723.76	7.50209e+06	1588.16	2.00078e+07	4235.56	2.66696	338	35.713	8.76318
XBXL10_1g7446	XBmRNA14034| mdh2.L	50	2	3	13	14	1393.71	0	0	2.00078e+07	14355.7	>1000	338	35.766	8.5874
XBXL10_1g17838	XBmRNA32952| psmc3.L	35.46	2	11	11	12	1191.86	7.3992e+06	6208.12	1.95377e+07	16392.6	2.64052	423	47.3675	5.22412
XBXL10_1g1024	XBmRNA1585| anapc10.L	23.78	2	4	4	6	#N/A	9.50623e+06	#N/A	1.94682e+07	#N/A	#N/A	185	21.1808	9.31982
XBXL10_1g26149	XBmRNA48924| rps7.S	45.13	1	6	6	10	2802.13	0	0	1.94558e+07	6943.2	>1000	195	22.2694	10.0962
XBXL10_1g39912	XBmRNA75069| XB5733004.L	12.7	1	3	3	5	880.923	4.85188e+06	5507.72	1.94513e+07	22080.6	4.00902	244	26.5123	4.81787
XBXL10_1g31928	XBmRNA60252| rps19.L	55.86	1	1	10	14	230.004	5.91736e+06	25727.3	1.94357e+07	84501.8	3.28452	145	16.0496	10.4185
XBXL10_1g39813	XBmRNA74911| rpl27.L	37.5	3	5	5	6	#N/A	0	#N/A	1.93963e+07	#N/A	#N/A	136	15.8468	10.6235
XBXL10_1g33358	XBmRNA62937| ppp2r1b.S	27.16	3	1	12	13	674.025	0	0	19387418	28763.6	>1000	589	65.483	5.0083
XBXL10_1g19988	XBmRNA36984| rpn1.L	31.6	1	7	16	20	954.326	2.93655e+06	3077.09	1.93656e+07	20292.5	6.59469	595	67.1777	6.58057
XBXL10_1g1129	XBmRNA1770| gar1.L	21.08	1	2	7	7	#N/A	4.3212e+06	#N/A	1.885e+07	#N/A	#N/A	223	22.7412	10.7847
XBXL10_1g38763	XBmRNA73126| cct3.S	33.46	2	19	19	21	2199.21	5.59524e+06	2544.2	1.88438e+07	8568.41	3.36782	547	60.5975	6.26514
XBXL10_1g33314	XBmRNA62859| rps25.S	30.4	2	5	5	6	#N/A	0	#N/A	18765036	#N/A	#N/A	125	13.8207	10.1108
XBXL10_1g33926	XBmRNA64007| ndufa4.S	50	1	3	6	11	348.985	3.43457e+06	9841.6	1.86844e+07	53539.2	5.44009	82	9.62093	9.84717
XBXL10_1g36208	XBmRNA68559| XB5997770.L	31.82	1	7	7	8	303.905	2.57169e+07	84621.8	1.86199e+07	61268.8	0.724032	264	29.1652	7.7085
XBXL10_1g32115	XBmRNA60511| ndufa4.L	51.22	1	4	7	11	1213.07	4.76484e+06	3927.91	1.84906e+07	15242.8	3.88063	82	9.63895	9.78857
XBXL10_1g9759	XBmRNA18257| gstm1.S	36.99	1	9	9	10	3670.09	0	0	1.8404e+07	5014.58	>1000	219	25.375	7.82568
XBXL10_1g20937	XBmRNA38711| LOC108715250 (cap5AL)	17.06	1	5	31	35	90.5718	0	0	1.82072e+07	201025	>1000	2069	228.952	8.17725
XBXL10_1g35469	XBmRNA66989| bag6.L	15.83	1	5	13	18	239.342	5.36518e+06	22416.4	1.80586e+07	75450.9	3.36588	1137	121.687	5.59229
XBXL10_1g634	XBmRNA737| cgl.2.L	15	5	5	5	5	6265.64	0	0	1.80086e+07	2874.19	>1000	320	35.2598	5.24951
XBXL10_1g30675	XBmRNA57851| ccser2.L	26.49	1	13	21	24	4.06881	3.69981e+06	909310	1.79816e+07	4.41938e+06	4.86015	1106	123.434	7.31299
XBXL10_1g7565	XBmRNA14212| nipsnap2.L	23.05	2	6	7	9	475.111	7.41087e+06	15598.2	1.79488e+07	37778	2.42195	282	33.0557	8.93896
XBXL10_1g13471	XBmRNA25586| erlin2.L	32.84	1	8	13	17	626.854	2.41008e+06	3844.72	1.79411e+07	28620.9	7.4442	335	37.2683	5.71924
XBXL10_1g15774	XBmRNA29481| LOC108712947	1.96	1	2	2	3	103.887	2.66969e+06	25697.9	1.78838e+07	172146	6.69882	816	93.8373	7.02002
XBXL10_1g13683	XBmRNA25971| npm2.L	24	1	2	2	3	1748.37	0	0	1.78557e+07	10212.8	>1000	200	22.0319	4.84326
XBXL10_1g18654	XBmRNA34319| cdt1.L	25.97	1	6	16	17	62.9304	1.35167e+06	21478.8	1.77035e+07	281319	13.0975	620	69.835	9.81787
XBXL10_1g4476	XBmRNA8316| lsm4.S	20.44	2	2	2	2	#N/A	0	#N/A	1.76963e+07	#N/A	#N/A	137	15.0936	9.99365
XBXL10_1g24800	XBmRNA46291| mdh1.S	14.45	1	2	7	8	4074.93	0	0	1.76133e+07	4322.36	>1000	353	38.511	7.00537
XBXL10_1g42151	XBmRNA79231| mapre1.S	32.2	2	6	6	9	1094.02	1.09989e+07	10053.6	1.75471e+07	16039.1	1.59536	295	32.8367	5.47803
XBXL10_1g8856	XBmRNA16623| LOC108708798 (ALOXE3)	3.13	4	1	2	2	228.305	0	0	1.74231e+07	76315.1	>1000	670	75.9602	5.78271
XBXL10_1g22895	XBmRNA42667| cct4.L	40.26	3	6	18	23	998.784	3.48607e+06	3490.31	1.73474e+07	17368.5	4.97621	539	57.8547	7.60596
XBXL10_1g30805	XBmRNA58138| echs1.L	39.86	1	10	10	13	649.189	2.31385e+06	3564.22	1.72872e+07	26629	7.47118	286	31.114	8.42627
XBXL10_1g6256	XBmRNA11742| atp5po.L	21.8	1	4	4	8	1997.68	5.97276e+06	2989.85	1.72745e+07	8647.31	2.89222	211	22.8454	9.83252
XBXL10_1g2507	XBmRNA4362| nipsnap1.L	27.24	2	7	8	13	#N/A	1.37513e+07	#N/A	1.72389e+07	#N/A	#N/A	279	33.0318	9.24658
XBXL10_1g13276	XBmRNA25175| pdia3.L	29.4	1	7	12	12	2327.38	0	0	1.72264e+07	7401.62	>1000	500	55.7541	5.77002
XBXL10_1g10810	XBmRNA20340| senp1.S	16.18	1	5	8	10	16.0811	1.86379e+06	115899	1.72069e+07	1.07e+06	9.2322	618	70.1326	8.66064
XBXL10_1g6297	XBmRNA11815| cct8.L	26.71	2	14	14	15	1284.41	3.36365e+06	2618.83	1.70579e+07	13280.7	5.07125	554	60.3628	5.60498
XBXL10_1g14246	XBmRNA26875| get3.L	23.39	3	8	8	9	76.3205	3.14086e+06	41153.6	1.70156e+07	222949	5.41749	342	38.3101	4.85596
XBXL10_1g17614	XBmRNA32444| rps13.L	20	1	1	3	4	1364.32	0	0	1.69001e+07	12387.2	>1000	155	17.9856	10.0815
XBXL10_1g20986	XBmRNA38815| hsd17b12.S	10.06	1	1	3	3	353.85	0	0	1.68421e+07	47596.8	>1000	318	34.9234	9.48096
XBXL10_1g34086	XBmRNA64291| rpl10.L	20.47	1	3	5	8	1717.25	1.79007e+06	1042.41	1.68074e+07	9787.42	9.38926	215	24.5659	10.1987
XBXL10_1g22641	XBmRNA42208| eprs1.L	23.41	1	15	34	37	530.166	1.89628e+06	3576.77	1.66183e+07	31345.6	8.76365	1781	199.188	8.30908
XBXL10_1g24959	XBmRNA46562| eprs1.S	19.24	1	9	28	31	167.683	1.89628e+06	11308.8	1.66183e+07	99106	8.76365	1710	191.785	8.41162
XBXL10_1g15659	XBmRNA29254| pdia3.S	22.11	1	5	10	10	3402.59	0	0	1.63744e+07	4812.34	>1000	502	56.0864	5.99854
XBXL10_1g21231	XBmRNA39301| cdt1.S	22.01	2	5	15	16	5.55783	1.35167e+06	243201	1.63614e+07	2.94385e+06	12.1046	618	69.8745	9.90576
XBXL10_1g4039	XBmRNA7379| gar1.S	20.61	1	1	6	6	226.924	7.17845e+06	31633.7	1.62959e+07	71812.1	2.27011	228	23.1615	11.1069
XBXL10_1g38284	XBmRNA72346| bag6.S	14.45	1	4	12	14	147.246	5.35746e+06	36384.3	1.62867e+07	110608	3.04	1135	121.343	5.45264
XBXL10_1g15196	XBmRNA28323| skp1.S	27.93	2	5	5	6	#N/A	0	#N/A	1.62232e+07	#N/A	#N/A	179	20.5441	4.56396
XBXL10_1g21092	XBmRNA39051| spty2d1.S	31.34	2	19	19	20	2.85976	2.59188e+06	906330	1.61998e+07	5.66474e+06	6.2502	801	83.7957	9.90576
XBXL10_1g10103	XBmRNA18870| hdac1.S	12.5	2	3	5	6	183.195	0	0	1.6162e+07	88223.4	>1000	480	54.9047	5.75732
XBXL10_1g37264	XBmRNA70327| LOC108699777	17.55	1	7	65	71	114.65	3.09937e+06	27033.2	1.61388e+07	140765	5.20713	4645	532.398	6.45557
XBXL10_1g35915	XBmRNA67877| dync1h1.L	17.09	1	4	62	67	427.329	3.09937e+06	7252.89	1.61388e+07	37766.8	5.20713	4645	532.561	6.43018
XBXL10_1g8478	XBmRNA16045| cul5.L	28.59	3	25	25	30	65.8072	3.63286e+06	55204.6	1.5943e+07	242268	4.38854	780	90.7292	7.92822
XBXL10_1g43724	XBmRNA82312| dnajb11.S	18.06	1	1	5	5	356.336	0	0	1.59378e+07	44726.9	>1000	360	40.8887	6.32861
XBXL10_1g15498	XBmRNA28953| erlin2.S	35.76	1	7	12	16	320.932	1.98202e+06	6175.83	1.58214e+07	49298.2	7.98244	330	36.8232	6.66846
XBXL10_1g20770	XBmRNA38244| psmd13.S	32.8	1	9	9	9	810.66	0	0	1.57341e+07	19409	>1000	378	43.0352	5.89697
XBXL10_1g29125	XBmRNA54760| psma2.S	50.85	1	9	9	12	#N/A	0	#N/A	1.57272e+07	#N/A	#N/A	234	25.8182	6.80029
XBXL10_1g24416	XBmRNA45701| ddx1.L	24.86	1	15	15	18	385.013	2.16683e+06	5627.95	1.56741e+07	40710.6	7.23363	740	82.2948	7.37158
XBXL10_1g24794	XBmRNA46273| cct4.S	25.88	3	1	13	16	1380.03	2.25548e+06	1634.37	1.55492e+07	11267.2	6.89395	541	57.8487	7.32764
XBXL10_1g21934	XBmRNA40734| poldip3.S	25.93	1	4	9	13	1.80599	6.95607e+06	3.85168e+06	1.54803e+07	8.57166e+06	2.22544	405	44.4194	9.92041
XBXL10_1g4752	XBmRNA8825| rps6.S	25.7	1	1	6	8	1009.79	0	0	1.53927e+07	15243.5	>1000	249	28.6589	10.9019
XBXL10_1g1976	XBmRNA3513| rps6.L	27.71	1	1	6	8	3045.72	0	0	1.53927e+07	5053.87	>1000	249	28.6909	10.9019
XBXL10_1g33057	XBmRNA62407| LOC108697536	22.02	2	7	7	8	117.26	0	0	1.53883e+07	131232	>1000	504	54.8888	6.39209
XBXL10_1g37008	XBmRNA69801| psmb4.L	26.61	2	3	3	4	389.794	0	0	1.52876e+07	39219.8	>1000	248	27.3436	5.84619
XBXL10_1g22259	XBmRNA41380| rpn1.S	22.52	1	2	11	14	347.973	2.95378e+06	8488.52	1.52864e+07	43929.7	5.17519	595	67.1678	6.45557
XBXL10_1g12616	XBmRNA23616| csrp2.L	32.81	1	5	6	8	173.808	9.59462e+06	55202.5	1.52614e+07	87806.2	1.59062	192	20.8677	8.44092
XBXL10_1g22285	XBmRNA41422| qars1.S	28.11	1	8	19	19	291.83	0	0	1.51909e+07	52054.1	>1000	772	87.4852	7.28369
XBXL10_1g32215	XBmRNA60705| haus5.L	20.42	1	13	13	16	83.6963	0	0	15174515	181304	>1000	666	77.1916	8.22119
XBXL10_1g420	XBmRNA437| cct7.L	23.57	2	10	10	15	1861.11	5.35228e+06	2875.85	1.51406e+07	8135.26	2.82882	543	59.0697	6.34131
XBXL10_1g20022	XBmRNA37044| qars1.L	22.41	1	4	15	15	525.34	0	0	1.51044e+07	28751.6	>1000	772	87.6012	7.29834
XBXL10_1g22887	XBmRNA42640| mdh1.L	15.3	1	2	7	9	2107.66	2.31418e+06	1097.99	1.50442e+07	7137.89	6.50089	353	38.4649	6.69775
XBXL10_1g582	XBmRNA626| immt.L	33.03	2	22	22	29	597.868	2.6212e+06	4384.24	1.50422e+07	25159.8	5.73869	766	85.0412	5.99854
XBXL10_1g41492	XBmRNA78300| phkg2.L	1.77	1	1	1	1	19.3794	0	0	1.49992e+07	773976	>1000	395	45.8615	8.1626
XBXL10_1g7391	XBmRNA13925| cap1.L	24.37	1	5	11	13	930.029	3.16795e+06	3406.29	1.49348e+07	16058.4	4.71434	476	51.3466	8.70459
XBXL10_1g30841	XBmRNA58218| kdm2a.L	15.29	2	16	16	16	44.8951	0	0	1.49346e+07	332656	>1000	1184	135.617	8.00146
XBXL10_1g4738	XBmRNA8801| XB5909790.S	11.43	1	1	1	1	1685.23	0	0	1.49205e+07	8853.65	>1000	105	11.6559	5.03369
XBXL10_1g42261	XBmRNA79438| psmb3.S	34.63	2	7	7	8	977.147	0	0	1.48984e+07	15246.8	>1000	205	23.0264	5.16064
XBXL10_1g43044	XBmRNA80908| atp5pd.S	55.28	1	3	9	11	2249.79	6.73492e+06	2993.57	1.48205e+07	6587.52	2.20055	161	18.6024	7.56201
XBXL10_1g40058	XBmRNA75341| atp5pd.L	49.69	1	2	8	10	1117.85	9.43407e+06	8439.46	1.48205e+07	13258	1.57096	161	18.7106	7.48877
XBXL10_1g33523	XBmRNA63265| rpl22.S	28.91	2	4	4	5	#N/A	2.57548e+06	#N/A	1.47252e+07	#N/A	#N/A	128	14.8068	9.18799
XBXL10_1g22985	XBmRNA42826| dusp12.L	17.88	1	4	4	4	80.6981	0	0	1.46722e+07	181816	>1000	330	36.2501	7.35693
XBXL10_1g29412	XBmRNA55293| cndp2.S	35.23	1	5	12	15	928.326	1.65915e+06	1787.24	1.44806e+07	15598.7	8.72778	474	52.7119	5.43994
XBXL10_1g17564	XBmRNA32348| ybx2.S	20.99	1	3	6	7	531.508	0	0	1.4412e+07	27115.3	>1000	324	36.154	9.29053
XBXL10_1g41390	XBmRNA78110| rps2.L	18.15	2	5	5	6	160.381	3.66324e+06	22840.8	1.43827e+07	89677.9	3.92621	281	30.2551	10.1548
XBXL10_1g30521	XBmRNA57488| cox5b.2.L	9.16	1	2	2	5	1882.66	1.28804e+07	6841.6	1.43657e+07	7630.52	1.11531	131	14.8386	8.80713
XBXL10_1g10194	XBmRNA19064| cap1.S	17.89	1	2	8	10	338.247	3.05747e+06	9039.14	1.43298e+07	42364.8	4.68681	475	51.0993	8.51416
XBXL10_1g8791	XBmRNA16483| LOC108708824	26.61	2	22	22	24	236.514	1.17021e+06	4947.77	1.42757e+07	60359.1	12.1993	872	99.3353	9.43701
XBXL10_1g26960	XBmRNA50500| slc25a13.L	30.33	2	6	17	18	221.56	3.7388e+06	16874.9	1.42375e+07	64260	3.80803	676	74.5988	8.6167
XBXL10_1g28890	XBmRNA54346| slc25a13.S	20.71	2	1	12	14	494.73	3.7388e+06	7557.26	1.42375e+07	28778.3	3.80803	676	74.6939	8.70459
XBXL10_1g4079	XBmRNA7505| aimp1.S	25.29	1	6	6	6	416.09	0	0	1.41313e+07	33962.1	>1000	340	37.1736	9.02686
XBXL10_1g21254	XBmRNA39334| rpl13.S	31.75	1	1	7	9	2609.07	0	0	1.41152e+07	5410.07	>1000	211	24.1835	11.5171
XBXL10_1g18666	XBmRNA34337| LOC121393045 (rpl13.L)	32.7	1	1	7	9	687.377	0	0	1.41152e+07	20534.9	>1000	211	24.1565	11.5171
XBXL10_1g7597	XBmRNA14266| rfc2.L	28.16	2	8	8	9	273.018	0	0	1.40751e+07	51553.8	>1000	348	38.4599	7.28369
XBXL10_1g2768	XBmRNA4881| ran.L	28.24	2	6	6	7	#N/A	5.17663e+06	#N/A	1.4072e+07	#N/A	#N/A	216	24.3826	7.88428
XBXL10_1g37131	XBmRNA70032| psma6.S	20.73	1	1	5	5	440.509	0	0	1.40288e+07	31846.8	>1000	246	27.3188	7.1958
XBXL10_1g11311	XBmRNA21229| alox12b.S	12.09	1	6	7	9	1012.01	4.02299e+06	3975.26	1.40096e+07	13843.4	3.48238	670	75.8792	6.06201
XBXL10_1g4311	XBmRNA7993| plin3.S	38.82	1	8	9	15	587.391	4.71083e+06	8019.91	1.3998e+07	23830.8	2.97145	425	46.1541	5.5415
XBXL10_1g37589	XBmRNA70972| rpl7a.S	25.94	1	1	6	6	3828.33	0	0	1.39903e+07	3654.42	>1000	266	29.8549	10.5356
XBXL10_1g36041	XBmRNA68166| lgals3.L	20.69	2	4	4	4	1879.07	0	0	1.39886e+07	7444.44	>1000	261	28.3141	6.78564
XBXL10_1g12476	XBmRNA23346| slc25a3.L	10.31	1	1	5	6	207.365	5.88339e+06	28372.1	1.37872e+07	66487.6	2.34341	359	39.8804	9.1001
XBXL10_1g3308	XBmRNA6016| fech.L	35.17	2	11	11	13	440.413	1.99977e+06	4540.66	1.37338e+07	31184	6.86772	418	46.8191	9.15869
XBXL10_1g37282	XBmRNA70372| rtraf.S	42.5	1	2	9	11	168.773	2.85802e+06	16934.1	1.37206e+07	81296.3	4.80074	240	27.5953	6.90283
XBXL10_1g35891	XBmRNA67803| rtraf.L	35.42	1	1	8	10	330.212	0	0	1.37206e+07	41550.9	>1000	240	27.6034	6.90283
XBXL10_1g40988	XBmRNA77319| hspd1.L	31.25	2	14	14	17	1038.7	4.80111e+06	4622.24	1.36453e+07	13136.9	2.84211	576	61.5427	6.30322
XBXL10_1g42256	XBmRNA79433| rpl23.S	26.43	1	6	6	6	2897.68	0	0	1.34678e+07	4647.76	>1000	140	14.842	10.5063
XBXL10_1g16335	XBmRNA30675| slc25a3.S	10.28	1	1	5	6	989.427	5.88339e+06	5946.26	1.34637e+07	13607.6	2.28843	360	40.0025	9.24658
XBXL10_1g2876	XBmRNA5135| rpl6.L	29.84	1	2	7	7	996.02	0	0	1.34583e+07	13512.1	>1000	258	29.6408	10.9604
XBXL10_1g25082	XBmRNA46837| pnpt1.S	20.89	1	15	15	15	190.745	0	0	1.33349e+07	69909.5	>1000	785	86.1517	8.52881
XBXL10_1g30830	XBmRNA58194| ndufv1.L	13.59	1	4	4	6	805.103	4.30012e+06	5341.08	1.33175e+07	16541.4	3.09702	471	51.6761	8.1626
XBXL10_1g36125	XBmRNA68372| psma6.L	20.73	1	1	5	5	1245.31	0	0	1.33128e+07	10690.4	>1000	246	27.4458	6.87354
XBXL10_1g27781	XBmRNA52151| LOC108719192	38.39	2	4	4	8	#N/A	2.43361e+06	#N/A	1.33122e+07	#N/A	#N/A	112	12.465	4.77979
XBXL10_1g27736	XBmRNA52066| cndp2.L	29.32	1	4	11	13	1821.23	3.44965e+06	1894.13	1.32897e+07	7297.14	3.85249	474	52.742	5.78271
XBXL10_1g23398	XBmRNA43675| rps12.L	13.64	2	2	2	2	3422.9	2.84635e+06	831.563	1.32203e+07	3862.32	4.64465	132	14.5055	7.23975
XBXL10_1g15230	XBmRNA28394| rps14.S	32.45	3	6	6	7	#N/A	4.21804e+06	#N/A	1.31764e+07	#N/A	#N/A	151	16.2625	10.0522
XBXL10_1g38261	XBmRNA72291| LOC108700221 (haus3.2.S)	27.98	1	11	11	12	55.6935	0	0	1.31571e+07	236242	>1000	579	66.1553	4.98291
XBXL10_1g42311	XBmRNA79536| pabpc1l.S	27.66	4	4	16	19	445.462	2.38091e+06	5344.8	1.30674e+07	29334.5	5.48842	629	70.6586	9.31982
XBXL10_1g39077	XBmRNA73708| pabpc1l.L	23.85	4	1	13	16	180.209	2.38091e+06	13212	1.30674e+07	72512.8	5.48842	629	70.5338	9.30518
XBXL10_1g34355	XBmRNA64828| rpl7a.L	25.94	1	1	6	7	1075.58	0	0	1.30596e+07	12141.9	>1000	266	29.8229	10.5356
XBXL10_1g35871	XBmRNA67772| psmc6.L	43.42	2	14	14	15	821.594	0	0	1.30552e+07	15890.1	>1000	403	45.769	7.1958
XBXL10_1g39228	XBmRNA73944| psmc5.L	44.58	3	14	14	17	1049.54	1.32479e+06	1262.26	12966526	12354.5	9.78759	415	46.4933	7.54736
XBXL10_1g37077	XBmRNA69932| rpl10.S	17.21	1	1	3	6	2440.8	1.79007e+06	733.395	1.28275e+07	5255.47	7.16594	215	24.5248	10.1401
XBXL10_1g16089	XBmRNA30127| psmc2.S	35.57	2	15	15	19	115.328	0	0	1.27612e+07	110651	>1000	433	48.6191	5.79541
XBXL10_1g38471	XBmRNA72667| LOC108700584 (knl1.S)	0.25	1	1	1	1	44.9045	0	0	1.26143e+07	280915	>1000	2798	312.233	5.41455
XBXL10_1g23176	XBmRNA43167| LOC121393661 (psmb1.L)	30.96	1	1	5	8	1474.67	0	0	1.25385e+07	8502.6	>1000	239	26.5633	7.02002
XBXL10_1g8057	XBmRNA15225| pa2g4.L	17.69	1	1	8	8	617.984	0	0	1.24274e+07	20109.5	>1000	390	43.4431	6.80029
XBXL10_1g29169	XBmRNA54835| cct5.S	26.99	2	13	13	15	2151.35	3.30077e+06	1534.28	1.24246e+07	5775.25	3.76416	541	59.55	6.13818
XBXL10_1g30395	XBmRNA57257| actr1a.L	28.72	1	8	8	11	#N/A	8.62357e+06	#N/A	1.24128e+07	#N/A	#N/A	376	42.6129	6.63916
XBXL10_1g40496	XBmRNA76188| LOC108701277	19.49	2	7	7	7	2437.42	0	0	1.23982e+07	5086.62	>1000	354	40.4654	5.96045
XBXL10_1g40980	XBmRNA77309| dnajb11.L	18.16	1	1	5	5	19.2811	0	0	1.23834e+07	642256	>1000	358	40.7256	6.48096
XBXL10_1g34674	XBmRNA65546| rbm18.L	19.53	1	3	3	4	19.9224	0	0	1.23031e+07	617550	>1000	215	24.4256	9.59814
XBXL10_1g25258	XBmRNA47145| psmb1.S	30.96	1	1	5	8	545.527	0	0	1.22782e+07	22507	>1000	239	26.6184	7.44482
XBXL10_1g26925	XBmRNA50427| sri.L	28.57	1	2	6	8	1154.1	6.16238e+06	5339.54	1.21995e+07	10570.5	1.97967	196	21.7103	6.17627
XBXL10_1g20580	XBmRNA37846| cfl1.S	16.67	5	1	3	4	1705.25	1.27676e+06	748.725	1.21758e+07	7140.19	9.53646	168	19.1077	7.75244
XBXL10_1g21719	XBmRNA40277| LOC108715604 (scp2.S)	27.86	2	4	4	4	616.156	0	0	1.20703e+07	19589.6	>1000	140	14.9487	9.26123
XBXL10_1g18355	XBmRNA33770| cfl1.L	10.22	5	1	3	4	3218.54	1.27676e+06	396.69	1.20232e+07	3735.61	9.41696	274	31.029	8.92432
XBXL10_1g36019	XBmRNA68117| psma3.L	21.18	2	5	5	6	1157.38	0	0	1.202e+07	10385.6	>1000	255	28.346	5.09717
XBXL10_1g25205	XBmRNA47050| spast.S	22.33	2	9	9	11	87.0653	2.1021e+06	24143.9	1.20086e+07	137927	5.71269	600	65.8424	9.33447
XBXL10_1g32160	XBmRNA60583| psmc4.L	33.33	3	9	9	10	140.448	0	0	1.20022e+07	85456.6	>1000	420	47.3776	5.16064
XBXL10_1g25700	XBmRNA48030| psmd1.S	19.14	3	13	13	14	156.322	0	0	1.19474e+07	76428.3	>1000	951	105.391	5.33838
XBXL10_1g40906	XBmRNA77180| ndufs1.L	31.51	2	19	19	22	896.698	4.79832e+06	5351.1	1.19185e+07	13291.5	2.48389	733	80.3861	6.78564
XBXL10_1g19585	XBmRNA36247| myh9.L	19.6	8	13	32	33	901.737	4.08692e+06	4532.27	1.18893e+07	13184.8	2.9091	1964	226.67	5.5415
XBXL10_1g27843	XBmRNA52296| rbbp8.L	12.03	2	10	10	11	19.0069	0	0	1.1556e+07	607993	>1000	856	98.2903	6.31592
XBXL10_1g33715	XBmRNA63679| rps9	33.51	3	8	8	8	4018.96	1.47207e+06	366.28	1.15442e+07	2872.43	7.84217	194	22.5636	10.5796
XBXL10_1g21943	XBmRNA40764| myh9.S	13.37	8	3	22	23	543.621	4.08692e+06	7517.96	1.15264e+07	21203	2.82031	1960	226.739	5.5542
XBXL10_1g32451	XBmRNA61218| mlf2.S	32.95	1	4	5	8	6.3952	9.45918e+06	1.47911e+06	1.14941e+07	1.7973e+06	1.21513	264	29.8218	6.7417
XBXL10_1g23820	XBmRNA44500| LOC121393781	26.36	3	3	3	4	1638.91	2.69622e+06	1645.13	1.14905e+07	7011.1	4.26172	110	12.5667	11.1802
XBXL10_1g6084	XBmRNA11367| atp6v1a.L	30.63	2	1	14	18	179.611	4.97765e+06	27713.6	1.14857e+07	63947.7	2.30745	617	68.4807	5.74463
XBXL10_1g9247	XBmRNA17270| atp6v1a.S	30.63	2	1	14	18	678.095	4.97765e+06	7340.65	1.14857e+07	16938.2	2.30745	617	68.5116	5.74463
XBXL10_1g5418	XBmRNA10112| rpl6.S	23.55	1	1	6	6	2690.42	0	0	1.13214e+07	4208.04	>1000	293	33.7318	10.7114
XBXL10_1g829	XBmRNA1207| paics.1.L	8.55	2	8	8	10	1280.22	2.49049e+06	1945.35	1.12741e+07	8806.38	4.52688	983	111.31	8.06006
XBXL10_1g18023	XBmRNA33271| muc6.L	0.91	1	6	6	6	19.2649	0	0	1.12461e+07	583760	>1000	6906	702.98	8.1626
XBXL10_1g18785	XBmRNA34634| kars1.L	18.18	2	10	10	11	344.808	0	0	1.12233e+07	32549.4	>1000	605	69.5926	6.80029
XBXL10_1g40774	XBmRNA76785| ftcd.L	23.03	1	9	9	11	1421.17	2.80579e+06	1974.28	1.11552e+07	7849.34	3.9758	469	51.75	6.48096
XBXL10_1g10707	XBmRNA20112| pa2g4.S	17.69	1	1	8	8	1861.83	0	0	1.11502e+07	5988.86	>1000	390	43.4581	6.99072
XBXL10_1g2890	XBmRNA5158| rfc5.L	26.27	1	1	6	7	148.439	0	0	1.1105e+07	74812.3	>1000	335	37.9507	8.29443
XBXL10_1g12294	XBmRNA22975| lars1.L	23.94	1	22	22	28	393.11	0	0	1.10721e+07	28165.4	>1000	1178	134.019	7.06396
XBXL10_1g13675	XBmRNA25960| LOC108711609 (atp6v1b2.L)	33.07	3	13	13	15	#N/A	4.98339e+06	#N/A	1.10194e+07	#N/A	#N/A	511	56.4056	5.90967
XBXL10_1g2239	XBmRNA4134| psmb5.L	10.12	1	1	2	2	1012.88	0	0	1.10052e+07	10865.2	>1000	257	28.256	6.53662
XBXL10_1g30835	XBmRNA58204| ndufs8.L	5.8	1	1	1	1	599.648	0	0	1.09464e+07	18254.8	>1000	207	23.4456	6.34131
XBXL10_1g38981	XBmRNA73555| psmd3.L	18.83	1	2	9	9	701.986	0	0	1.08995e+07	15526.7	>1000	547	62.8778	9.26123
XBXL10_1g42223	XBmRNA79368| psmd3.S	16.87	1	1	8	8	92.2817	0	0	1.08995e+07	118112	>1000	498	57.4319	8.29443
XBXL10_1g14920	XBmRNA27738| ybx2.L	23.43	5	3	6	7	1186.44	0	0	1.08956e+07	9183.46	>1000	367	40.6304	9.31982
XBXL10_1g9142	XBmRNA17028| atp5po.S	11.85	1	2	2	2	936.609	0	0	1.08709e+07	11606.6	>1000	211	22.8755	9.84717
XBXL10_1g19088	XBmRNA35263| psma4.L	22.61	1	1	7	7	1169.73	1.23504e+06	1055.83	1.08235e+07	9252.94	8.76366	261	29.4092	7.72314
XBXL10_1g27209	XBmRNA50942| LOC121394610 (rpl14.L)	23.19	2	3	3	3	2656.61	0	0	1.08216e+07	4073.45	>1000	138	16.1267	10.5356
XBXL10_1g4385	XBmRNA8153| rps15.S	26.16	1	3	3	4	1719.48	0	0	1.07754e+07	6266.69	>1000	172	20.0976	10.1987
XBXL10_1g22360	XBmRNA41610| psmd6.S	23.65	1	1	8	9	570.188	2.08053e+06	3648.85	1.07721e+07	18892.3	5.1776	389	45.5584	5.99854
XBXL10_1g43373	XBmRNA81550| nhej1.S	7.18	1	2	2	4	93.7716	0	0	1.06788e+07	113881	>1000	362	40.8144	7.89893
XBXL10_1g31005	XBmRNA58614| nxpe2.L	1.21	1	1	1	1	#N/A	0	#N/A	1.06747e+07	#N/A	#N/A	579	66.8378	8.52881
XBXL10_1g2561	XBmRNA4469| tchp.L	37.45	1	17	17	17	1.9634	0	0	1.06674e+07	5.43312e+06	>1000	510	62.3429	7.07861
XBXL10_1g27788	XBmRNA52159| ndufv2.L	9.88	1	2	2	3	944.18	2.23228e+06	2364.26	1.05888e+07	11214.8	4.74348	243	26.5783	6.29053
XBXL10_1g30435	XBmRNA57331| pgam1.L	24.41	1	2	4	5	883.868	4.7557e+06	5380.55	1.05843e+07	11975	2.22561	254	28.8647	6.55127
XBXL10_1g14836	XBmRNA27652| eif4a1.L	33.74	3	1	10	10	514.413	0	0	1.05301e+07	20470	>1000	406	45.9894	5.47803
XBXL10_1g34672	XBmRNA65540| ndufa8.L	31.98	1	3	3	3	709.628	0	0	1.04818e+07	14770.8	>1000	172	19.8979	7.63525
XBXL10_1g24156	XBmRNA45186| farsb.L	10.37	2	6	6	6	189.845	0	0	1.03705e+07	54626	>1000	588	65.6791	6.04932
XBXL10_1g6575	XBmRNA12316| prdx4.L	22.1	2	5	5	6	4.10739	0	0	1.03466e+07	2.51901e+06	>1000	267	29.7922	6.72705
XBXL10_1g43398	XBmRNA81597| dars1.S	21.89	2	11	11	11	77.2094	0	0	1.03126e+07	133566	>1000	530	60.1255	6.01123
XBXL10_1g14967	XBmRNA27853| stk38l.S	5.39	2	1	2	3	21.9586	0	0	10302864	469195	>1000	464	53.7252	7.26904
XBXL10_1g23467	XBmRNA43806| hdac2.L	9.02	2	1	3	4	235.732	0	0	1.02615e+07	43530.4	>1000	488	55.4119	5.84619
XBXL10_1g34479	XBmRNA65134| ccdc22.L	20.61	2	12	12	12	96.0656	0	0	1.02473e+07	106670	>1000	655	74.6396	6.66846
XBXL10_1g1629	XBmRNA2898| XB5727280.L	7.85	2	2	2	2	548.568	0	0	1.01621e+07	18524.8	>1000	242	26.9975	5.2749
XBXL10_1g25815	XBmRNA48278| fxr1.S	14.07	2	8	8	9	52.6565	0	0	1.00824e+07	191475	>1000	675	76.1659	6.65381
XBXL10_1g41226	XBmRNA77787| ldaf1.L	15.43	1	2	2	3	39.9287	0	0	1.00709e+07	252223	>1000	162	17.2801	7.82568
XBXL10_1g1801	XBmRNA3203| XB22169562.L	45.04	1	7	7	9	881.832	0	0	9.82431e+06	11140.8	>1000	242	27.4961	8.1333
XBXL10_1g12575	XBmRNA23542| cand1.L	16.18	1	2	18	18	611.515	0	0	9.81013e+06	16042.4	>1000	1230	136.3	5.8335
XBXL10_1g16262	XBmRNA30532| LOC108713159	15.61	2	1	17	17	101.817	0	0	9.81013e+06	96350.3	>1000	1230	136.091	5.8335
XBXL10_1g39975	XBmRNA75179| cpne1.L	14.04	13	3	8	8	596.436	0	0	9.79852e+06	16428.5	>1000	534	59.1869	6.17627
XBXL10_1g39687	XBmRNA74637| rpl38.L	32.86	1	3	3	4	#N/A	0	#N/A	9.79368e+06	#N/A	#N/A	70	8.20072	10.0522
XBXL10_1g27704	XBmRNA51997| gmnn.L	28.74	1	4	6	6	110.607	0	0	9.79141e+06	88524	>1000	247	28.4263	5.89697
XBXL10_1g42983	XBmRNA80797| cpne1.S	12.2	13	2	7	7	426.846	0	0	9.7644e+06	22875.7	>1000	533	58.9878	5.45264
XBXL10_1g2107	XBmRNA3853| anxa1.1.L	31.84	2	2	11	12	1021.85	374171	366.168	9.76058e+06	9551.84	26.0859	358	39.9314	7.66455
XBXL10_1g4885	XBmRNA9138| anxa1.1.S	30.03	2	1	10	11	896.947	374171	417.16	9.76058e+06	10882	26.0859	343	38.1506	7.66455
XBXL10_1g38972	XBmRNA73543| wipf2.L	23.47	1	5	8	9	28.4955	0	0	9.7271e+06	341356	>1000	426	44.5111	10.8579
XBXL10_1g31079	XBmRNA58792| atp5mg.L	34.58	2	1	3	5	86.0874	3.03167e+06	35216.2	9.72345e+06	112949	3.20729	107	11.6913	9.92041
XBXL10_1g28191	XBmRNA52936| rpl30.L	25.86	2	3	3	5	2923.54	0	0	9.6985e+06	3317.39	>1000	116	12.9299	9.62744
XBXL10_1g19699	XBmRNA36440| rpl3.L	10.67	2	4	4	4	2888.31	0	0	9.66543e+06	3346.4	>1000	403	46.0118	10.1694
XBXL10_1g2488	XBmRNA4335| pxmp2.L	23.32	1	4	4	4	101.499	0	0	9.656e+06	95134.3	>1000	193	22.1523	10.4185
XBXL10_1g11993	XBmRNA22380| ndufa9.L	42.44	1	11	11	11	927.897	0	0	9.63769e+06	10386.6	>1000	377	42.8575	9.45166
XBXL10_1g6061	XBmRNA11322| XB22164552.L	30.61	1	2	2	2	1934.68	0	0	9.62122e+06	4973.03	>1000	98	10.9705	7.32764
XBXL10_1g6503	XBmRNA12196| rpl23a.L	27.74	2	5	5	5	#N/A	0	#N/A	9.59459e+06	#N/A	#N/A	155	17.6631	10.3892
XBXL10_1g33631	XBmRNA63517| isoc2.S	39.51	1	5	5	5	223.513	0	0	9.57771e+06	42850.8	>1000	205	22.6459	7.29834
XBXL10_1g3162	XBmRNA5720| kif2a.L	6.85	2	3	5	6	11.7808	0	0	9.57369e+06	812653	>1000	745	84.0977	6.43018
XBXL10_1g43229	XBmRNA81267| ddx5.S	11.2	2	2	7	7	49.7155	0	0	9.49872e+06	191062	>1000	607	68.1932	9.14404
XBXL10_1g40336	XBmRNA75830| ddx5.L	9.38	2	1	6	6	204.928	0	0	9.49872e+06	46351.6	>1000	608	68.3222	9.08545
XBXL10_1g10331	XBmRNA19301| rpl24.S	29.68	2	6	6	6	2629.26	0	0	9.4787e+06	3605.09	>1000	155	17.6788	11.2534
XBXL10_1g35822	XBmRNA67691| vrk1.L	13.2	1	2	4	4	150.866	0	0	9.45906e+06	62698.4	>1000	409	45.9809	9.43701
XBXL10_1g32681	XBmRNA61704| pgam1.S	24.41	1	2	4	6	1945.03	4.7557e+06	2445.05	9.42425e+06	4845.3	1.98168	254	28.7767	6.55127
XBXL10_1g22459	XBmRNA41817| LOC108704415	30.77	1	7	7	7	34.1425	0	0	9.39237e+06	275094	>1000	338	37.869	9.49561
XBXL10_1g10921	XBmRNA20530| ckap2.S	21.28	1	13	16	18	24.4669	0	0	9.38265e+06	383484	>1000	686	76.2839	9.33447
XBXL10_1g3755	XBmRNA6833| LOC108706570	15.63	1	1	3	3	752.942	0	0	9.37965e+06	12457.3	>1000	192	21.9059	10.1401
XBXL10_1g21843	XBmRNA40540| prdx6.S	33.48	2	4	4	5	2074.44	2.64553e+06	1275.3	9.37114e+06	4517.44	3.54226	224	25.0537	5.66846
XBXL10_1g5429	XBmRNA10135| rfc5.S	34.33	1	4	9	10	108.829	0	0	9.27195e+06	85197.4	>1000	335	37.8796	7.81104
XBXL10_1g40778	XBmRNA76795| pcnt.L	11.76	1	48	48	50	26.0074	0	0	9.24955e+06	355650	>1000	4489	523.805	5.18604
XBXL10_1g35637	XBmRNA67282| psmd8.L	23.25	2	6	6	6	196.972	1.63913e+06	8321.63	9.24374e+06	46929.2	5.63942	271	31.1622	6.80029
XBXL10_1g42505	XBmRNA79895| dpm1.S	15.38	2	3	3	3	191.459	0	0	9.22509e+06	48183.1	>1000	247	27.7757	9.49561
XBXL10_1g760	XBmRNA1039| rpl9.L	15.63	1	1	3	3	1786.18	0	0	9.17752e+06	5138.07	>1000	192	21.8848	10.0376
XBXL10_1g8371	XBmRNA15853| rfc3.L	23.03	1	7	7	8	262.028	0	0	9.14365e+06	34895.7	>1000	356	40.316	8.41162
XBXL10_1g34553	XBmRNA65293| bcap31.L	25	2	5	5	5	270.018	0	0	9.116e+06	33760.6	>1000	244	27.8552	9.05615
XBXL10_1g19995	XBmRNA36996| uqcrc1.L	29.29	1	10	10	12	1042.45	5.30414e+06	5088.16	9.10294e+06	8732.26	1.71619	478	52.3124	6.21436
XBXL10_1g21455	XBmRNA39714| got2.S	14.75	1	5	7	9	1239.29	2.27983e+06	1839.63	9.08226e+06	7328.59	3.98374	427	47.6705	9.14404
XBXL10_1g30574	XBmRNA57581| anxa7.L	20.58	3	11	11	11	756.525	0	0	9.0461e+06	11957.4	>1000	520	53.9634	7.1665
XBXL10_1g10203	XBmRNA19085| cltc.S	8.79	4	14	14	18	101.592	3.96965e+06	39074.5	9.0171e+06	88758.1	2.27151	1683	192.346	5.66846
XBXL10_1g27378	XBmRNA51335| anln.L	9.77	2	10	10	10	37.1257	0	0	8.99463e+06	242275	>1000	1116	122.694	8.06006
XBXL10_1g20104	XBmRNA37249| psmd6.L	26.99	1	2	9	9	405.139	5.26191e+06	12987.9	8.97126e+06	22143.7	1.70494	389	45.6763	5.50342
XBXL10_1g14707	XBmRNA27481| psmb6.L	18.45	2	4	4	4	415.839	0	0	8.93819e+06	21494.3	>1000	233	24.8102	5.87158
XBXL10_1g37328	XBmRNA70462| vrk1.S	8.62	1	1	3	3	44.4265	0	0	8.87576e+06	199786	>1000	406	45.7397	9.42236
XBXL10_1g33325	XBmRNA62877| LOC108697599	34.58	1	1	3	5	1084.42	3.03167e+06	2795.66	8.87139e+06	8180.77	2.92624	107	11.6343	9.75928
XBXL10_1g35766	XBmRNA67559| psmc1.L	20.68	2	7	7	8	3.00028	0	0	8.8387e+06	2.94596e+06	>1000	440	49.0957	6.354
XBXL10_1g852	XBmRNA1247| mtus1.L	12.71	4	16	16	17	43.2131	0	0	8.82287e+06	204171	>1000	1338	147.005	7.91357
XBXL10_1g28849	XBmRNA54270| sri.S	19.39	1	1	4	5	536.086	7.05971e+06	13169	8.8018e+06	16418.6	1.24676	196	21.6712	6.17627
XBXL10_1g21580	XBmRNA40015| psma4.S	22.61	1	1	7	7	682.011	1.23504e+06	1810.88	8.79981e+06	12902.7	7.12512	261	29.3941	7.32764
XBXL10_1g21293	XBmRNA39398| psmd7.S	29.06	2	8	8	11	#N/A	0	#N/A	8.75211e+06	#N/A	#N/A	320	36.6273	6.68311
XBXL10_1g43575	XBmRNA81998| ndufa10.S	16.24	2	4	4	4	579.609	0	0	8.74011e+06	15079.3	>1000	351	40.0301	6.69775
XBXL10_1g7149	XBmRNA13414| capza1.L	9.79	2	2	2	2	498.884	0	0	8.72198e+06	17483	>1000	286	32.8253	5.8208
XBXL10_1g3009	XBmRNA5406| ell2.L	22.06	1	3	10	10	131.61	0	0	8.70465e+06	66139.5	>1000	630	70.9212	9.26123
XBXL10_1g2237	XBmRNA4132| haus4.L	28.61	1	10	10	10	98.9116	0	0	8.69434e+06	87900.1	>1000	353	41.1905	5.41455
XBXL10_1g12553	XBmRNA23483| rpl18a.L	18.18	1	1	4	4	441.597	0	0	8.6641e+06	19619.9	>1000	176	20.623	10.9458
XBXL10_1g15198	XBmRNA28334| vdac1.S	17.31	2	3	4	4	134.357	0	0	8.65697e+06	64432.5	>1000	283	30.6274	7.40088
XBXL10_1g42606	XBmRNA80113| vapb.S	14.4	2	3	3	3	343.675	2.15008e+06	6256.13	8.60311e+06	25032.7	4.0013	243	27.3341	7.32764
XBXL10_1g6417	XBmRNA12078| specc1.L	0.66	3	1	1	1	11.7115	0	0	8.58853e+06	733339	>1000	1055	117.414	6.66846
XBXL10_1g3131	XBmRNA5666| cdk7.L	4.83	1	2	2	2	81.6306	0	0	8.56292e+06	104898	>1000	352	39.6659	8.57275
XBXL10_1g42215	XBmRNA79355| cdc6.S	14.08	2	8	8	8	84.99	0	0	8.53576e+06	100433	>1000	554	60.7224	9.56885
XBXL10_1g36995	XBmRNA69775| ints3.L	12.67	2	10	10	10	22.6483	0	0	8.52965e+06	376613	>1000	1018	116.67	5.63037
XBXL10_1g23912	XBmRNA44677| rfc4.L	15.43	1	5	5	6	245.306	0	0	8.52144e+06	34738	>1000	363	39.9849	7.79639
XBXL10_1g29388	XBmRNA55233| gmnn.S	36.53	1	3	5	6	20.2315	0	0	8.42065e+06	416216	>1000	219	25.3595	5.14795
XBXL10_1g27557	XBmRNA51698| serpinb6.L	13.98	1	4	4	5	1132.87	0	0	8.41964e+06	7432.13	>1000	379	42.6524	6.46826
XBXL10_1g4428	XBmRNA8244| rps28p9.S	30.43	1	2	2	2	#N/A	0	#N/A	8.41396e+06	#N/A	#N/A	69	7.8332	10.6968
XBXL10_1g19601	XBmRNA36275| st13.L	11.44	1	1	4	4	777.55	923469	1187.67	8.38962e+06	10789.8	9.0849	376	41.3641	5.12256
XBXL10_1g17536	XBmRNA32316| eif4a1.S	33.74	3	1	10	10	1310.06	0	0	8.28929e+06	6327.41	>1000	406	46.0475	5.47803
XBXL10_1g711	XBmRNA925| lap3.L	21.73	1	9	9	10	1797.45	0	0	8.25543e+06	4592.87	>1000	520	56.1876	7.73779
XBXL10_1g27295	XBmRNA51132| cul1.L	15.08	2	10	10	11	#N/A	1.12998e+06	#N/A	8.20837e+06	#N/A	#N/A	776	89.664	8.00146
XBXL10_1g30885	XBmRNA58309| mtg1.L	15.38	1	4	4	5	108.602	0	0	8.18921e+06	75405.4	>1000	312	34.9888	9.37842
XBXL10_1g1864	XBmRNA3320| haus8.L	30.79	5	9	9	9	108.808	0	0	8.15709e+06	74967.6	>1000	367	41.0856	8.29443
XBXL10_1g30200	XBmRNA56837| cisd1.L	37.86	2	3	3	6	1994.94	3.28913e+06	1648.73	8.09471e+06	4057.61	2.46105	103	11.4066	8.35303
XBXL10_1g20837	XBmRNA38393| depdc7.S	19.08	1	3	7	7	32.8591	0	0	8.09411e+06	246328	>1000	435	49.5834	6.97607
XBXL10_1g23988	XBmRNA44881| eif5a.L	12.34	2	2	2	4	1642.71	2.81915e+06	1716.15	8.08147e+06	4919.58	2.86663	154	16.6933	5.80811
XBXL10_1g22227	XBmRNA41314| h108.S	11.03	1	1	2	2	525.192	0	0	8.07643e+06	15378.1	>1000	263	28.1799	10.1548
XBXL10_1g15214	XBmRNA28368| npm1.S	14	2	3	3	4	610.718	0	0	8.0701e+06	13214.1	>1000	300	33.6407	4.84326
XBXL10_1g43460	XBmRNA81771| psmd14.S	37.74	1	7	7	7	#N/A	0	#N/A	8.05763e+06	#N/A	#N/A	310	34.5446	6.45557
XBXL10_1g18930	XBmRNA34882| got2.L	11.01	1	2	4	6	2194.9	2.27983e+06	1038.69	8.04162e+06	3663.77	3.52728	427	47.5543	8.83643
XBXL10_1g43221	XBmRNA81241| psmd12.S	15.19	2	6	6	6	704.6	0	0	8.02313e+06	11386.8	>1000	441	51.3956	6.40479
XBXL10_1g17866	XBmRNA33006| depdc7.L	18.2	1	4	8	8	80.3563	0	0	8.02078e+06	99815.1	>1000	522	59.6675	7.6499
XBXL10_1g1974	XBmRNA3511| plin2.L	12.15	1	2	4	4	4216.32	0	0	8.00093e+06	1897.61	>1000	428	47.1685	5.05908
XBXL10_1g43391	XBmRNA81586| XB5731801.S	7.14	1	1	1	1	279.956	0	0	7983707	28517.8	>1000	98	11.0208	10.0522
XBXL10_1g16228	XBmRNA30463| nap1l1.S	7.5	2	3	3	3	1355.04	0	0	7.9825e+06	5890.99	>1000	547	63.6327	4.97021
XBXL10_1g27143	XBmRNA50821| rpl15.L	23.53	2	5	5	5	362.514	0	0	7.96744e+06	21978.3	>1000	204	24.047	11.3999
XBXL10_1g43875	XBmRNA82575| get4.S	15.08	2	5	5	6	156.376	1.02246e+07	65384.7	7.95661e+06	50881.4	0.778185	325	36.6822	5.8335
XBXL10_1g16536	XBmRNA31050| rars1.S	16.36	1	9	9	11	483.376	1.52145e+06	3147.55	7.94252e+06	16431.4	5.22037	660	75.3288	6.50732
XBXL10_1g5004	XBmRNA9364| psmb5.S	10.12	1	1	2	2	201.858	0	0	7.92026e+06	39236.7	>1000	257	28.285	6.78564
XBXL10_1g42466	XBmRNA79809| cse1l.S	15.96	1	5	12	12	285.28	0	0	7.90022e+06	27692.9	>1000	971	110.068	5.43994
XBXL10_1g39268	XBmRNA74008| cse1l.L	11.43	1	1	8	8	636.343	0	0	7.90022e+06	12415	>1000	971	109.894	5.52881
XBXL10_1g3364	XBmRNA6136| haus1.L	43.36	1	11	11	13	123.274	0	0	7.88558e+06	63967.9	>1000	286	32.617	5.90967
XBXL10_1g3344	XBmRNA6097| rpl17.L	27.17	2	5	6	6	#N/A	0	#N/A	7.87353e+06	#N/A	#N/A	184	21.3964	10.1841
XBXL10_1g16276	XBmRNA30574| rpl18a.S	18.18	1	1	4	4	2134.74	0	0	7.84692e+06	3675.82	>1000	176	20.639	10.9458
XBXL10_1g31553	XBmRNA59669| rpl18.L	28.19	1	1	5	6	972.812	2.24209e+06	2304.75	7.72793e+06	7943.91	3.44675	188	21.6101	11.7075
XBXL10_1g18876	XBmRNA34793| dnaja2.L	19.95	2	6	6	9	265.053	4.05427e+06	15296.1	7.67365e+06	28951.4	1.89273	411	45.3624	6.13818
XBXL10_1g40994	XBmRNA77331| fscn1.L	10.54	3	1	5	5	600.69	0	0	7.65456e+06	12743	>1000	484	53.0934	6.85889
XBXL10_1g43733	XBmRNA82324| fscn1.S	9.88	3	1	5	5	822.601	0	0	7.65456e+06	9305.32	>1000	486	53.4345	6.56592
XBXL10_1g21960	XBmRNA40796| st13.S	9.23	1	1	4	4	1340.06	923469	689.124	7.65053e+06	5709.08	8.28455	379	41.8816	5.18604
XBXL10_1g9242	XBmRNA17260| LOC108709281	16.25	2	3	3	4	763.599	3.03869e+06	3979.43	7.60076e+06	9953.86	2.50133	160	17.8424	9.64209
XBXL10_1g3028	XBmRNA5449| cetn3.L	14.97	2	1	1	1	90.364	0	0	7.60044e+06	84109.2	>1000	167	19.3328	4.729
XBXL10_1g5567	XBmRNA10436| rps23.S	13.29	1	2	2	2	2335.26	0	0	7.58458e+06	3247.86	>1000	143	15.7587	10.4771
XBXL10_1g43737	XBmRNA82334| atp5mf.S	24.72	1	2	2	3	1902.64	5.27578e+06	2772.87	7.57402e+06	3980.79	1.43562	89	10.2484	9.87646
XBXL10_1g27187	XBmRNA50886| dync1li1.L	5.51	2	2	2	2	178.694	3.12297e+06	17476.6	7.56309e+06	42324.2	2.42176	508	55.9432	5.79541
XBXL10_1g3878	XBmRNA7090| galntl6.S	1.5	2	1	1	1	#N/A	0	#N/A	7.54701e+06	#N/A	#N/A	600	69.97	7.28369
XBXL10_1g3765	XBmRNA6866| uchl1.S	3.59	2	1	1	2	611.454	3.29512e+06	5388.99	7.54585e+06	12340.8	2.29001	223	24.7956	5.78271
XBXL10_1g41028	XBmRNA77408| hba0l5.L	20.86	2	2	2	2	3999.46	0	0	7.53988e+06	1885.22	>1000	139	14.9067	6.25244
XBXL10_1g7707	XBmRNA14523| rpl31.L	31.2	1	3	3	3	#N/A	0	#N/A	7.53947e+06	#N/A	#N/A	125	14.507	10.5649
XBXL10_1g21715	XBmRNA40273| gpx7.S	23.37	2	3	3	3	213.746	0	0	7.52003e+06	35182.1	>1000	184	20.7888	9.23193
XBXL10_1g2855	XBmRNA5088| arpc3.L	6.18	2	1	1	1	8.9542	0	0	7.51086e+06	838809	>1000	178	20.5844	8.5874
XBXL10_1g16224	XBmRNA30452| csrp2.S	32.81	1	3	4	5	457.951	7.1702e+06	15657.1	7.39199e+06	16141.4	1.03093	192	20.7026	8.26514
XBXL10_1g40366	XBmRNA75895| rpl13a.L	15.58	2	4	4	4	2476.06	0	0	7.36147e+06	2973.05	>1000	231	26.418	11.1216
XBXL10_1g40519	XBmRNA76236| dnpep.L	15.45	1	2	6	6	272.151	4.10622e+06	15088	7.35721e+06	27033.6	1.79172	479	53.0018	6.87354
XBXL10_1g43360	XBmRNA81525| dnpep.S	11.33	1	1	5	5	540.966	0	0	7.35721e+06	13600.1	>1000	503	55.5451	6.81494
XBXL10_1g1463	XBmRNA2540| dnaja1.L	18.2	1	2	5	8	156.044	3.81523e+06	24449.7	7.35053e+06	47105.5	1.92663	401	45.0427	7.25439
XBXL10_1g2862	XBmRNA5106| ppp1cc.L	16.1	5	4	4	4	#N/A	0	#N/A	7.3458e+06	#N/A	#N/A	323	36.9317	6.53662
XBXL10_1g8059	XBmRNA15227| rps26.L	26.96	2	3	3	3	#N/A	0	#N/A	7.34489e+06	#N/A	#N/A	115	13.0851	11.0044
XBXL10_1g16445	XBmRNA30883| slc26a2.S	1.54	1	1	1	1	#N/A	0	#N/A	7.33931e+06	#N/A	#N/A	713	78.9943	8.11865
XBXL10_1g28451	XBmRNA53478| tbc1d20.2.L	4.12	1	1	1	1	#N/A	0	#N/A	7.31059e+06	#N/A	#N/A	388	44.1459	9.46631
XBXL10_1g20781	XBmRNA38266| ftmt.S	29.38	2	5	5	5	3450.16	8.10337e+06	2348.7	7.29771e+06	2115.18	0.900577	177	20.9051	5.69385
XBXL10_1g2714	XBmRNA4769| sdf2l1.L	25.23	2	4	4	5	157.603	0	0	7.13832e+06	45293.2	>1000	218	24.1647	6.62451
XBXL10_1g5538	XBmRNA10372| ell2.S	17.94	1	1	8	8	46.5649	0	0	7.13021e+06	153124	>1000	630	71.0102	9.30518
XBXL10_1g33618	XBmRNA63497| rpl18.S	28.19	1	1	5	6	1948.79	2.24209e+06	1150.5	7.10641e+06	3646.58	3.16955	188	21.536	11.7075
XBXL10_1g20860	XBmRNA38434| celf1.S	5.44	1	1	3	3	210.832	0	0	7.1002e+06	33677	>1000	533	57.3302	8.14795
XBXL10_1g8338	XBmRNA15742| ckap2.L	6.59	1	2	5	5	17.0503	0	0	7.03365e+06	412523	>1000	713	79.4796	9.51025
XBXL10_1g4751	XBmRNA8821| plin2.S	19.24	1	4	6	6	2560.61	0	0	7.01716e+06	2740.43	>1000	421	46.5034	5.07178
XBXL10_1g9559	XBmRNA17810| stk38.S	4.95	2	1	2	3	84.7572	0	0	7.01521e+06	82768.4	>1000	465	54.5836	7.15186
XBXL10_1g10592	XBmRNA19868| tdrd3.S	17.65	1	1	10	11	49.6808	0	0	6.98413e+06	140580	>1000	742	82.8745	8.63135
XBXL10_1g7921	XBmRNA14972| tdrd3.L	19.85	1	1	10	11	8.95595	0	0	6.98413e+06	779831	>1000	650	72.6551	8.73389
XBXL10_1g21950	XBmRNA40772| ndufa6.S	16.54	2	2	2	3	423.694	1.01517e+07	23960.1	6.96931e+06	16448.9	0.686514	127	14.7527	9.86182
XBXL10_1g17474	XBmRNA32229| fis1.S	11.26	2	2	2	2	166.51	0	0	6.89922e+06	41434.2	>1000	151	16.8941	9.15869
XBXL10_1g25291	XBmRNA47201| LOC108717861	30.12	3	2	2	2	#N/A	0	#N/A	6.89069e+06	#N/A	#N/A	83	9.17759	7.98682
XBXL10_1g43924	XBmRNA82647| ldaf1.S	6.17	1	1	1	2	118.148	0	0	6.88745e+06	58294.9	>1000	162	17.3891	8.17725
XBXL10_1g2623	XBmRNA4583| cox6a1.L	27.93	2	3	3	6	1628.85	4.89943e+06	3007.91	6.88722e+06	4228.28	1.40572	111	12.3474	9.24658
XBXL10_1g30982	XBmRNA58569| stt3a.L	6.52	2	4	5	5	107.332	0	0	6.84472e+06	63771.5	>1000	705	80.6029	7.84033
XBXL10_1g19108	XBmRNA35301| pif1.L	14.35	1	9	9	9	9.52107	4.74136e+06	497986	6.82594e+06	716930	1.43966	634	70.8404	9.59814
XBXL10_1g17847	XBmRNA32967| ndufs3.L	36	2	8	8	9	#N/A	2.97214e+06	#N/A	6.80712e+06	#N/A	#N/A	250	28.6487	6.41748
XBXL10_1g14225	XBmRNA26833| farsa.L	15.03	1	3	6	7	266.147	0	0	6.75911e+06	25396.1	>1000	499	56.8001	7.06396
XBXL10_1g33044	XBmRNA62376| tmx2.S	7.67	1	2	2	2	313.897	0	0	6.73119e+06	21444	>1000	287	33.1031	8.48486
XBXL10_1g40689	XBmRNA76605| dync1i2.L	11.45	3	5	5	7	261.227	1.77843e+06	6807.99	6726676	25750.3	3.78237	655	73.0737	5.23682
XBXL10_1g2729	XBmRNA4791| septin5.L	16.05	2	6	6	6	#N/A	0	#N/A	6.68309e+06	#N/A	#N/A	405	46.7857	6.60986
XBXL10_1g40376	XBmRNA75912| ccdc93.L	18.7	1	12	12	12	133.172	0	0	6.63878e+06	49851.3	>1000	615	71.58	7.13721
XBXL10_1g10986	XBmRNA20652| MGC80700	20.63	3	2	2	3	1819.24	0	0	6.608e+06	3632.29	>1000	160	18.6521	10.7114
XBXL10_1g17691	XBmRNA32605| ipo7.L	7.8	3	6	6	7	121.376	0	0	6.55984e+06	54045.7	>1000	1038	119.358	4.81787
XBXL10_1g12907	XBmRNA24419| snd1.L	17.97	2	14	14	15	892.365	2.4113e+06	2702.15	6.52803e+06	7315.43	2.70727	907	101.346	6.90283
XBXL10_1g17849	XBmRNA32971| mtch2.L	9.43	2	3	3	3	500.118	0	0	6.48868e+06	12974.3	>1000	297	32.7198	8.67529
XBXL10_1g15864	XBmRNA29606| commd4.S	9.14	1	2	2	2	120.598	0	0	6.46736e+06	53627.6	>1000	197	22.0745	7.6792
XBXL10_1g2680	XBmRNA4706| mif.L	6.96	1	1	1	1	1448.12	0	0	6.45225e+06	4455.6	>1000	115	12.4923	7.69385
XBXL10_1g15014	XBmRNA27962| ssbp1.S	34.44	1	3	5	5	840.341	3.70838e+06	4412.95	6.45196e+06	7677.79	1.73983	180	20.6398	9.59814
XBXL10_1g15766	XBmRNA29462| sltm.S	9.08	2	9	9	10	49.2313	0	0	6.42613e+06	130529	>1000	1013	114.759	8.89502
XBXL10_1g8479	XBmRNA16046| acat1.L	9.76	2	2	2	2	1710.48	0	0	6.40507e+06	3744.6	>1000	420	44.1297	8.70459
XBXL10_1g29484	XBmRNA55473| usp14.S	4.09	2	2	2	2	113.369	0	0	6.3995e+06	56448.4	>1000	489	55.5387	5.23682
XBXL10_1g39486	XBmRNA74418| csnk2a1.L	11.44	2	3	3	3	7.48887	0	0	6.39701e+06	854203	>1000	402	46.2434	8.27979
XBXL10_1g4325	XBmRNA8015| dnaja1.S	14.25	1	2	5	7	53.6037	0	0	6.38635e+06	119140	>1000	400	44.8575	7.44482
XBXL10_1g10222	XBmRNA19113| aldh3a2.S	7.51	2	3	3	4	326.25	0	0	6.38394e+06	19567.6	>1000	506	57.0917	8.83643
XBXL10_1g28288	XBmRNA53127| ndufb9.L	16.09	2	2	2	2	549.214	0	0	6.38368e+06	11623.3	>1000	174	21.2177	8.93896
XBXL10_1g9435	XBmRNA17602| atp5pb.S	8.4	1	2	2	2	652.452	0	0	6.37929e+06	9777.41	>1000	250	28.2162	9.5542
XBXL10_1g21629	XBmRNA40125| plk3.S	3.47	4	2	2	2	5.07014	0	0	6.37883e+06	1.25812e+06	>1000	662	74.4932	8.99756
XBXL10_1g27764	XBmRNA52108| ptpn2.L	4.94	1	1	2	2	50.5689	0	0	6.37845e+06	126134	>1000	486	56.2429	7.86963
XBXL10_1g38850	XBmRNA73319| psmd4.S	15.69	2	6	6	6	197.157	0	0	6.35509e+06	32233.7	>1000	376	40.5391	4.80518
XBXL10_1g4022	XBmRNA7345| rpl34.S	20.51	2	3	3	3	#N/A	0	#N/A	6.3351e+06	#N/A	#N/A	117	13.2835	11.4731
XBXL10_1g776	XBmRNA1092| tmem33.L	8.5	2	2	2	2	90.0804	0	0	6.33068e+06	70278.1	>1000	247	28.0257	9.5542
XBXL10_1g19961	XBmRNA36936| uroc1.L	11.23	1	7	7	7	406.879	0	0	6.32817e+06	15552.9	>1000	677	74.6852	6.60986
XBXL10_1g35266	XBmRNA66566| cetn1.L	46.51	2	5	5	6	245.693	0	0	6.32173e+06	25730.2	>1000	172	19.7069	4.99561
XBXL10_1g35769	XBmRNA67563| LOC108698710	20.13	1	3	3	3	#N/A	0	#N/A	6.31172e+06	#N/A	#N/A	149	16.8268	4.22119
XBXL10_1g5370	XBmRNA10020| denr.S	4	1	1	1	1	625.481	0	0	6.30285e+06	10076.8	>1000	200	22.3484	5.59229
XBXL10_1g2478	XBmRNA4321| smtn.L	7.52	1	4	6	6	31.6409	0	0	6.29747e+06	199030	>1000	998	110.743	8.35303
XBXL10_1g14356	XBmRNA27060| mcm7.L	10.69	2	6	6	6	327.906	0	0	6.29557e+06	19199.3	>1000	720	81.6803	6.3667
XBXL10_1g32780	XBmRNA61857| got1.S	18.49	3	5	5	5	1372.45	0	0	6.28803e+06	4581.62	>1000	411	45.9	6.65381
XBXL10_1g3098	XBmRNA5607| poc5.L	12.24	1	5	5	5	47.8515	0	0	6.27771e+06	131192	>1000	572	63.9658	6.75635
XBXL10_1g38399	XBmRNA72538| fbxo27.S	17.97	1	6	6	6	79.708	0	0	6.25225e+06	78439.4	>1000	295	34.5805	8.60205
XBXL10_1g41145	XBmRNA77633| ints1.L	6.3	1	10	10	10	17.6603	0	0	6.24739e+06	353753	>1000	2191	246.124	6.11279
XBXL10_1g18911	XBmRNA34847| aars1.L	9.3	1	10	10	10	1178.34	0	0	6.23871e+06	5294.49	>1000	968	107.451	5.59229
XBXL10_1g19794	XBmRNA36620| iars1.L	8.34	1	2	10	10	278.51	0	0	6.21886e+06	22329.1	>1000	1259	144.549	6.85889
XBXL10_1g4933	XBmRNA9228| habp4.S	26.19	1	6	6	6	1850.48	0	0	6.2055e+06	3353.46	>1000	378	42.6501	6.7417
XBXL10_1g39359	XBmRNA74185| adrm1.L	9.65	2	3	3	4	67.7997	2.90601e+06	42861.7	6.19765e+06	91411.2	2.1327	404	42.0207	5.021
XBXL10_1g19662	XBmRNA36374| fmo5.1.L	17.38	1	8	8	8	33.3755	0	0	6.1843e+06	185295	>1000	535	60.519	8.74854
XBXL10_1g37094	XBmRNA69956| uba1.S	8.59	3	8	8	9	525.623	2.35893e+06	4487.86	6.12184e+06	11646.8	2.59518	1059	117.922	5.73193
XBXL10_1g26169	XBmRNA48954| ywhaq.S	21.54	10	5	6	6	921.795	0	0	6.07288e+06	6588.1	>1000	246	27.6567	4.81787
XBXL10_1g29309	XBmRNA55087| txndc5.S	9.16	2	4	4	4	1436.39	0	0	6.0621e+06	4220.38	>1000	404	45.9047	5.94775
XBXL10_1g2628	XBmRNA4589| dynll1.L	14.61	2	3	3	3	246.453	0	0	6.0557e+06	24571.4	>1000	89	10.3512	7.37158
XBXL10_1g35001	XBmRNA66119| gatd3alc.1.L	36.89	2	5	5	6	1390.15	5.72361e+06	4117.27	6.03719e+06	4342.84	1.05479	225	24.1233	7.13721
XBXL10_1g24462	XBmRNA45769| wdcp.L	3.44	1	2	2	2	13.0005	0	0	5.99367e+06	461034	>1000	726	79.6585	6.81494
XBXL10_1g17177	XBmRNA31842| farsa.S	11.65	1	1	4	5	163.248	0	0	5.97057e+06	36573.6	>1000	498	56.7171	7.41553
XBXL10_1g22119	XBmRNA41117| iars1.S	7.15	1	1	9	9	133.797	0	0	5.96432e+06	44577.4	>1000	1259	143.919	7.03467
XBXL10_1g15901	XBmRNA29685| anxa2.S	4.71	2	1	2	2	22.9669	0	0	5.91872e+06	257706	>1000	340	38.5209	8.45557
XBXL10_1g31352	XBmRNA59287| park7.L	14.29	2	1	1	1	1321.3	0	0	5.91583e+06	4477.28	>1000	189	20.1567	6.04932
XBXL10_1g28463	XBmRNA53504| mapk15.L	25.43	1	11	11	11	33.3451	0	0	5.90989e+06	177234	>1000	586	64.9488	9.5835
XBXL10_1g10767	XBmRNA20266| dctn2.S	18.11	2	6	6	6	111.955	0	0	5.90755e+06	52767.4	>1000	403	44.8009	5.18604
XBXL10_1g687	XBmRNA861| wdr1.L	9.75	1	2	5	5	481.775	0	0	5.87071e+06	12185.6	>1000	605	65.8488	6.82959
XBXL10_1g13517	XBmRNA25690| pcna.L	10.73	2	3	3	4	1488.75	0	0	5.86938e+06	3942.49	>1000	261	28.7903	4.65283
XBXL10_1g7461	XBmRNA14055| LOC108708306	12.94	4	4	4	4	235.717	0	0	5.77371e+06	24494.3	>1000	425	47.7151	4.94482
XBXL10_1g1196	XBmRNA1933| cisd2.L	10.37	2	1	1	1	#N/A	0	#N/A	5.77209e+06	#N/A	#N/A	135	15.3566	9.71533
XBXL10_1g1356	XBmRNA2283| aff1.L	5.23	1	5	5	5	#N/A	0	#N/A	5.7267e+06	#N/A	#N/A	1166	129.484	8.57275
XBXL10_1g18211	XBmRNA33552| stip1.L	14.36	3	8	8	8	1370.1	0	0	5.65557e+06	4127.86	>1000	543	62.0674	7.32764
XBXL10_1g11128	XBmRNA20906| alg8.S	7.34	1	3	3	3	241.382	0	0	5.63422e+06	23341.5	>1000	545	61.2663	9.02686
XBXL10_1g12424	XBmRNA23237| gas2l3.L	15.09	1	9	9	9	3.39461	0	0	5.62182e+06	1.6561e+06	>1000	696	76.7193	9.90576
XBXL10_1g23078	XBmRNA43013| mthfd1l.L	7.19	1	6	6	6	459.879	0	0	5.61613e+06	12212.2	>1000	960	103.682	8.35303
XBXL10_1g41176	XBmRNA77714| trrap.L	7.14	2	22	22	22	6.28878	0	0	5.60327e+06	890994	>1000	3838	435.501	8.22119
XBXL10_1g3073	XBmRNA5555| map1b.L	0.31	1	1	1	1	#N/A	0	#N/A	5.58054e+06	#N/A	#N/A	2255	248.184	4.88135
XBXL10_1g41325	XBmRNA77992| pam16.L	14.4	2	2	2	2	24.5177	0	0	5.56859e+06	227126	>1000	125	13.8342	9.43701
XBXL10_1g34045	XBmRNA64189| padi2.S	4.55	2	3	3	3	458.616	0	0	5.52403e+06	12045	>1000	660	74.0496	6.39209
XBXL10_1g22314	XBmRNA41481| arpc4.S	9.52	1	2	2	2	537.917	0	0	5.52376e+06	10268.8	>1000	168	19.6793	8.42627
XBXL10_1g26956	XBmRNA50489| LOC108718843	4.49	3	1	1	1	#N/A	0	#N/A	5.47954e+06	#N/A	#N/A	356	39.8863	4.91943
XBXL10_1g42216	XBmRNA79357| wipf2.S	10.26	1	1	4	4	97.355	0	0	5.47608e+06	56248.6	>1000	429	44.4159	10.8579
XBXL10_1g17908	XBmRNA33074| pkp3.L	11.95	2	10	10	13	38.7486	1.42549e+06	36788.1	5.46918e+06	141145	3.8367	820	90.9442	9.23193
XBXL10_1g20636	XBmRNA37992| LOC108715154	17.07	1	1	1	1	409.873	0	0	5.46298e+06	13328.5	>1000	123	13.9172	5.14795
XBXL10_1g35510	XBmRNA67064| abcf1.L	2.82	1	2	2	2	513.634	0	0	5.45308e+06	10616.7	>1000	888	100.461	7.63525
XBXL10_1g41426	XBmRNA78164| cops3.L	2.84	2	1	1	1	386.651	0	0	5.44615e+06	14085.5	>1000	423	47.7638	6.59521
XBXL10_1g6968	XBmRNA13043| stmn1.L	12.41	4	2	2	2	163.614	8.3891e+06	51273.8	5.43478e+06	33217.2	0.647838	145	16.7788	7.23975
XBXL10_1g3701	XBmRNA6745| wdr1.S	6.1	1	1	4	4	1221.07	0	0	5.41382e+06	4433.66	>1000	607	66.1288	6.56592
XBXL10_1g16040	XBmRNA29998| atp5f1c.S	18.57	2	5	5	5	1411.53	0	0	5.40116e+06	3826.45	>1000	307	33.9929	9.56885
XBXL10_1g5104	XBmRNA9503| smtn.S	5.07	1	2	4	4	160.798	0	0	5.3848e+06	33487.9	>1000	1005	111.775	8.47021
XBXL10_1g41221	XBmRNA77781| uqcrc2.L	17.07	1	5	7	8	852.005	4.02119e+06	4719.68	5.38393e+06	6319.13	1.33889	451	47.8316	8.90967
XBXL10_1g6241	XBmRNA11713| cbr1.1.L	30.69	5	6	6	7	1751.94	1.70874e+06	975.34	5.38302e+06	3072.61	3.15029	277	29.9347	8.47021
XBXL10_1g23829	XBmRNA44521| ncl.L	13.98	2	8	8	8	469.793	0	0	5.36462e+06	11419.1	>1000	651	70.1675	4.93213
XBXL10_1g35340	XBmRNA66695| snrpd2.L	5.93	1	1	1	2	1443.27	3.95663e+06	2741.42	5.36457e+06	3716.95	1.35585	118	13.5322	9.90576
XBXL10_1g12467	XBmRNA23315| lta4h.L	11.99	1	7	7	7	1277.91	0	0	5.30807e+06	4153.71	>1000	609	68.9754	6.81494
XBXL10_1g30701	XBmRNA57913| glud1.L	9.44	2	3	3	3	215.494	0	0	5.2871e+06	24534.7	>1000	540	59.5513	7.94287
XBXL10_1g24132	XBmRNA45143| gyg1.L	16.57	2	4	4	4	990.667	0	0	5.28287e+06	5332.64	>1000	332	37.5137	5.35107
XBXL10_1g25736	XBmRNA48098| rtp3a.3.S	12.05	1	4	4	4	5.37362	0	0	5.28186e+06	982925	>1000	224	25.8347	8.49951
XBXL10_1g9843	XBmRNA18407| sars1.S	17.22	2	8	8	8	686.606	0	0	5.25482e+06	7653.33	>1000	511	58.3157	6.30322
XBXL10_1g12336	XBmRNA23057| rpl26.L	24.83	2	5	5	5	3343.85	0	0	5.20728e+06	1557.27	>1000	145	17.1795	10.5503
XBXL10_1g35026	XBmRNA66157| mcts1.L	9.94	2	1	1	1	153.255	0	0	5.19687e+06	33909.9	>1000	181	20.5348	8.82178
XBXL10_1g40741	XBmRNA76725| prkra.L	21.36	1	5	5	5	710.973	0	0	5.19317e+06	7304.31	>1000	309	34.0482	8.25049
XBXL10_1g17726	XBmRNA32664| commd9.L	46.97	4	8	8	9	108.997	0	0	5.16118e+06	47351.6	>1000	198	21.6703	5.88428
XBXL10_1g14987	XBmRNA27895| samm50.S	5.56	2	2	2	3	132.733	0	0	5.14531e+06	38764.3	>1000	468	52.0364	6.69775
XBXL10_1g5313	XBmRNA9877| pgam5.S	5.82	2	2	2	2	280.392	0	0	5.13507e+06	18313.9	>1000	275	30.9951	9.0708
XBXL10_1g5993	XBmRNA11204| commd7.S	16.16	1	3	3	3	113.129	0	0	5.102e+06	45099.1	>1000	198	22.4695	5.24951
XBXL10_1g36040	XBmRNA68155| dlgap5.L	6.32	1	2	2	3	140.975	0	0	5.09136e+06	36115.3	>1000	1599	179.462	4.62744
XBXL10_1g18068	XBmRNA33364| taldo1.L	8.88	1	3	3	4	1570.05	3.53327e+06	2250.42	5.08492e+06	3238.7	1.43915	338	37.7485	6.45557
XBXL10_1g30169	XBmRNA56756| mlf2.L	35.8	1	4	5	8	7.34515	6.05171e+06	823906	5.08194e+06	691877	0.839752	243	27.5868	6.87354
XBXL10_1g3412	XBmRNA6234| stoml2.L	10.12	2	3	3	4	1068.12	2.1853e+06	2045.93	5.06939e+06	4746.08	2.31977	346	38.1647	6.40479
XBXL10_1g43919	XBmRNA82642| uqcrc2.S	8.87	1	1	3	4	985.455	4.02119e+06	4080.54	5.05757e+06	5132.22	1.25773	451	47.9356	8.92432
XBXL10_1g758	XBmRNA1037| rfc1.L	1.05	1	1	1	1	141.243	0	0	5.02354e+06	35566.7	>1000	1147	127.522	9.33447
XBXL10_1g39729	XBmRNA74733| p4hb.L	22.75	2	9	9	10	2562.62	0	0	5.00622e+06	1953.56	>1000	510	57.1919	4.83057
XBXL10_1g42246	XBmRNA79409| LOC108702499	19.29	1	3	3	3	3090.01	0	0	4.97969e+06	1611.54	>1000	197	23.4662	11.4731
XBXL10_1g31836	XBmRNA60082| MGC53066	10.11	2	2	2	3	2511.14	2.33961e+06	931.692	4.97666e+06	1981.83	2.12713	178	20.6674	5.65576
XBXL10_1g11282	XBmRNA21175| rrm1.S	14.45	2	8	8	8	534.117	0	0	4.9756e+06	9315.56	>1000	796	90.6196	6.75635
XBXL10_1g11488	XBmRNA21563| ssbp1.L	56.16	1	4	6	8	573.952	1.37534e+06	2396.25	4.96277e+06	8646.65	3.60841	146	16.7328	9.75928
XBXL10_1g17844	XBmRNA32962| celf1.L	4.7	1	1	3	3	35.5089	0	0	4.96043e+06	139695	>1000	489	52.3906	8.14795
XBXL10_1g7956	XBmRNA15046| LOC108708523	18.6	1	4	4	4	2138.35	0	0	4.95956e+06	2319.34	>1000	172	19.5136	4.79248
XBXL10_1g10538	XBmRNA19717| ipo5.S	2.56	2	2	2	2	86.3808	0	0	4.94078e+06	57197.7	>1000	1094	122.787	4.93213
XBXL10_1g7656	XBmRNA14382| XB6001422.L	9.55	1	3	3	3	8.03985	0	0	4.94025e+06	614471	>1000	356	41.0871	8.80713
XBXL10_1g36060	XBmRNA68198| haus2.L	17.12	1	3	3	3	94.3336	0	0	4.93229e+06	52285.6	>1000	222	25.0947	5.08447
XBXL10_1g1139	XBmRNA1786| LOC108710251	7.89	1	13	13	13	10.041	0	0	4.92537e+06	490525	>1000	1991	222.135	6.39209
XBXL10_1g19624	XBmRNA36307| uchl5.L	18.24	1	1	5	5	716.642	0	0	4.9142e+06	6857.27	>1000	329	37.7741	5.51611
XBXL10_1g13593	XBmRNA25831| pold2.L	3.02	1	1	1	1	231.228	0	0	4.85846e+06	21011.6	>1000	463	50.6394	4.94482
XBXL10_1g16292	XBmRNA30598| ndufa12.S	23.61	1	3	3	3	1039.99	0	0	4.83918e+06	4653.09	>1000	144	17.2556	9.33447
XBXL10_1g22871	XBmRNA42610| actr2.L	3.05	2	1	1	1	5.54045	0	0	4.83722e+06	873074	>1000	394	44.6511	6.55127
XBXL10_1g3779	XBmRNA6897| commd8.S	5.46	1	1	1	1	203.143	0	0	4.83614e+06	23806.5	>1000	183	20.3263	5.03369
XBXL10_1g38923	XBmRNA73463| acly.L	12.43	2	12	12	12	225.467	2.7641e+06	12259.5	4.74242e+06	21033.8	1.71572	1102	120.779	7.00537
XBXL10_1g4394	XBmRNA8176| atp5f1d.S	5.56	1	1	1	1	1319.97	0	0	4.73112e+06	3584.25	>1000	162	16.8718	4.91943
XBXL10_1g15004	XBmRNA27941| ppp2cal.S	8.09	3	1	1	1	73.9201	0	0	4.7288e+06	63971.8	>1000	309	35.5284	5.43994
XBXL10_1g43832	XBmRNA82502| vps35l.S	11.35	2	10	10	10	98.5328	0	0	4.7183e+06	47885.6	>1000	960	109.153	6.96143
XBXL10_1g35896	XBmRNA67811| tmx1.L	4.55	2	1	1	1	66.8024	0	0	4.71128e+06	70525.6	>1000	264	30.3601	5.04639
XBXL10_1g9434	XBmRNA17601| wdr77.S	2.1	1	1	1	2	820.873	0	0	4690843	5714.45	>1000	333	35.9998	5.33838
XBXL10_1g40467	XBmRNA76123| smarcal1.L	3.75	1	3	3	3	51.5888	0	0	4.68713e+06	90855.6	>1000	960	106.433	8.52881
XBXL10_1g39959	XBmRNA75129| eif2s2.L	10.45	2	3	3	4	534.422	0	0	4.68109e+06	8759.16	>1000	335	38.5765	5.93506
XBXL10_1g37346	XBmRNA70497| ppp4r4.S	6.06	2	4	4	5	#N/A	0	#N/A	4.67949e+06	#N/A	#N/A	874	99.5128	8.104
XBXL10_1g9791	XBmRNA18329| elk4.S	1.52	1	1	1	1	237.709	0	0	4.67455e+06	19665	>1000	660	73.7514	6.50732
XBXL10_1g39087	XBmRNA73725| eif6.L	15.51	2	2	2	2	65.0996	0	0	4.66367e+06	71639	>1000	245	26.6052	4.7417
XBXL10_1g19956	XBmRNA36926| lsm3.L	11.76	2	1	1	1	#N/A	0	#N/A	4.66142e+06	#N/A	#N/A	102	11.81	4.70361
XBXL10_1g28211	XBmRNA52972| ywhaz.L	26.94	2	2	7	7	713.427	0	0	4.64647e+06	6512.89	>1000	245	27.7117	4.79248
XBXL10_1g39160	XBmRNA73834| LOC108700837	10.82	2	2	2	2	#N/A	0	#N/A	4.64498e+06	#N/A	#N/A	194	21.499	7.69385
XBXL10_1g24987	XBmRNA46611| ints7.S	6.65	1	5	5	5	19.4357	0	0	4.63719e+06	238591	>1000	978	108.572	8.07471
XBXL10_1g19074	XBmRNA35209| pgm1.L	13.6	2	8	8	8	713.2	0	0	4.6356e+06	6499.72	>1000	566	62.0816	5.85889
XBXL10_1g27935	XBmRNA52442| atp6v1h.L	22.76	2	8	8	8	121.047	0	0	4.63543e+06	38294.5	>1000	479	55.2321	6.40479
XBXL10_1g35321	XBmRNA66664| rbmx.L	17.81	2	7	7	7	18.3167	0	0	4.63043e+06	252799	>1000	365	39.8002	9.93506
XBXL10_1g7329	XBmRNA13810| kdm1a.L	6.27	2	4	4	4	3.44918	0	0	4.63042e+06	1.34247e+06	>1000	830	91.5058	6.65381
XBXL10_1g23747	XBmRNA44361| LOC108716910	2.34	1	1	1	1	67.5109	0	0	4.60738e+06	68246.5	>1000	598	67.9484	9.5835
XBXL10_1g38920	XBmRNA73460| dnajc7.L	14.81	2	7	7	7	145.569	0	0	4.60046e+06	31603.3	>1000	493	56.3199	6.84424
XBXL10_1g22041	XBmRNA40974| aco2.S	12.15	1	2	7	7	993.436	0	0	4.5727e+06	4602.91	>1000	782	85.2216	7.12256
XBXL10_1g24148	XBmRNA45165| cul3.L	12.5	2	7	7	7	161.986	0	0	4.56276e+06	28167.6	>1000	768	88.8944	8.48486
XBXL10_1g28525	XBmRNA53584| LOC121395202	3.85	71	1	1	1	#N/A	0	#N/A	4.55347e+06	#N/A	#N/A	234	26.1987	6.69775
XBXL10_1g19970	XBmRNA36951| txnrd3.L	7.86	1	4	4	4	598.407	0	0	4.55279e+06	7608.17	>1000	598	65.853	5.92236
XBXL10_1g20139	XBmRNA37346| kctd6.L	19.12	4	4	4	4	10.2525	1.70616e+06	166414	4.51519e+06	440399	2.6464	272	31.4486	7.09326
XBXL10_1g17505	XBmRNA32265| pfn1.S	13.14	1	2	2	2	3072.11	0	0	4.51134e+06	1468.48	>1000	137	14.8692	7.53271
XBXL10_1g11923	XBmRNA22263| tmem263.L	13.16	2	1	1	1	267.533	0	0	4.50797e+06	16850.1	>1000	114	11.4849	8.68994
XBXL10_1g19041	XBmRNA35130| lrrc40.L	23.8	1	12	12	12	396.031	2.57404e+06	6499.6	4.49889e+06	11359.9	1.74779	605	67.0627	8.00146
XBXL10_1g29723	XBmRNA55933| ywhaz.S	23.27	2	1	6	6	1637.66	0	0	4.49311e+06	2743.61	>1000	245	27.7307	4.76709
XBXL10_1g34622	XBmRNA65417| psmb7.L	7.22	2	2	2	2	745.436	0	0	4.4679e+06	5993.67	>1000	277	29.93	8.29443
XBXL10_1g19682	XBmRNA36408| aco2.L	8.31	1	1	6	6	2474.51	0	0	4.46623e+06	1804.9	>1000	782	85.3856	7.10791
XBXL10_1g2645	XBmRNA4618| drg1.L	9.81	1	3	3	3	361.789	0	0	4.46437e+06	12339.7	>1000	367	40.3896	8.6167
XBXL10_1g12308	XBmRNA22994| csnk1a1.L	3.26	2	1	1	1	1.4596	0	0	4452210	3.05029e+06	>1000	368	42.2205	9.59814
XBXL10_1g38447	XBmRNA72624| gemin2.S	4.49	1	1	1	1	114.246	0	0	4.42109e+06	38698	>1000	267	30.3643	6.0874
XBXL10_1g9852	XBmRNA18417| dynll2.S	14.61	2	3	3	3	551.11	0	0	4.37382e+06	7936.39	>1000	89	10.3431	7.37158
XBXL10_1g6537	XBmRNA12245| rpa1.L	12.48	2	7	7	7	376.289	0	0	4.35425e+06	11571.6	>1000	609	67.0277	8.06006
XBXL10_1g3312	XBmRNA6026| txnl1.L	6.23	2	2	2	2	186.396	0	0	4.3405e+06	23286.4	>1000	289	32.0637	5.13525
XBXL10_1g4729	XBmRNA8789| ndufb6.S	14.84	1	1	1	1	439.436	0	0	4.33527e+06	9865.52	>1000	128	15.069	9.77393
XBXL10_1g41483	XBmRNA78280| rpusd4.L	5.9	1	2	2	2	50.9091	0	0	4.33073e+06	85068	>1000	322	35.1792	10.0229
XBXL10_1g2646	XBmRNA4619| eif4enif1.L	2.93	2	2	2	2	55.869	0	0	4.31323e+06	77202.5	>1000	957	106.126	7.73779
XBXL10_1g35625	XBmRNA67253| selenow1.L	23.53	1	3	3	3	80.4288	4.33692e+06	53922.5	4.29106e+06	53352.2	0.989425	85	9.61805	9.49561
XBXL10_1g28831	XBmRNA54236| gtpbp10.S	21.41	1	6	6	6	270.133	0	0	4.28961e+06	15879.6	>1000	383	42.0404	8.88037
XBXL10_1g11928	XBmRNA22276| ckap4.L	13.14	2	6	6	6	156.084	0	0	4.28665e+06	27463.8	>1000	548	60.7379	5.0083
XBXL10_1g25354	XBmRNA47348| katna1.S	17.83	3	9	9	9	106.446	0	0	4.27822e+06	40191.5	>1000	488	55.567	6.40479
XBXL10_1g4767	XBmRNA8859| rad23b.S	8.5	2	3	3	4	202.966	0	0	4.26796e+06	21028	>1000	412	43.818	4.53857
XBXL10_1g32119	XBmRNA60519| cox6b1.L	8.14	2	1	1	1	1663.46	0	0	4.25147e+06	2555.79	>1000	86	10.45	8.70459
XBXL10_1g19943	XBmRNA36893| h108.L	18	1	2	3	3	89.2176	0	0	4.23648e+06	47484.8	>1000	250	26.5689	10.1841
XBXL10_1g19590	XBmRNA36255| mcm5.L	7.07	2	5	5	5	581.268	0	0	4.23617e+06	7287.81	>1000	735	82.383	8.27979
XBXL10_1g1412	XBmRNA2440| hnrnpm.L	3.5	1	2	2	2	108.379	0	0	4.22263e+06	38961.8	>1000	742	78.2067	9.20264
XBXL10_1g2715	XBmRNA4770| top3b.L	8.04	1	5	5	5	57.3144	0	0	4.21455e+06	73533.9	>1000	858	96.482	8.25049
XBXL10_1g35413	XBmRNA66866| kifc1.L	9.18	1	4	4	4	15.6242	0	0	4.20056e+06	268850	>1000	643	71.9762	8.68994
XBXL10_1g21807	XBmRNA40448| abcd3.S	5.18	1	3	3	3	92.0142	0	0	4.19346e+06	45574.1	>1000	657	74.991	9.33447
XBXL10_1g33318	XBmRNA62867| vps11.S	2.63	1	2	2	2	91.2724	0	0	4.18945e+06	45900.6	>1000	914	104.568	6.771
XBXL10_1g27325	XBmRNA51197| mcm6.L	9.01	4	6	7	7	539.797	0	0	4.16168e+06	7709.72	>1000	821	92.5805	5.22412
XBXL10_1g1551	XBmRNA2751| gamt.L	6.87	2	2	2	2	911.937	0	0	4.15288e+06	4553.91	>1000	233	26.6202	5.57959
XBXL10_1g26062	XBmRNA48768| copb2.S	2.08	2	1	1	1	157.604	0	0	4146619	26310.4	>1000	915	102.897	5.17334
XBXL10_1g19992	XBmRNA36991| copg1.L	9.84	3	7	7	7	168.81	2.41057e+06	14279.8	4.13505e+06	24495.3	1.71539	874	97.7214	5.42725
XBXL10_1g21970	XBmRNA40815| uchl5.S	22.49	1	1	5	5	181.746	0	0	4.11829e+06	22659.6	>1000	329	37.706	5.33838
XBXL10_1g22249	XBmRNA41362| chchd6.S	10.33	1	3	3	4	438.76	2.41928e+06	5513.91	4.11578e+06	9380.48	1.70124	300	33.692	7.69385
XBXL10_1g35278	XBmRNA66585| pls3.L	5.72	3	3	3	3	152.411	0	0	4.11536e+06	27001.7	>1000	629	70.9155	5.84619
XBXL10_1g38044	XBmRNA71907| LOC496342	21.52	2	4	4	5	69.2527	0	0	4.10403e+06	59261.7	>1000	223	25.2285	8.26514
XBXL10_1g13121	XBmRNA24837| sord.L	4.44	2	2	2	2	494.61	0	0	4.08473e+06	8258.5	>1000	360	38.7209	6.96143
XBXL10_1g21728	XBmRNA40294| tceanc2.S	8.57	1	2	2	2	35.7242	0	0	4.0765e+06	114110	>1000	210	24.299	9.5249
XBXL10_1g13049	XBmRNA24727| ppib.L	6.94	5	2	2	2	2948.55	0	0	4.07138e+06	1380.81	>1000	216	23.8446	9.29053
XBXL10_1g10915	XBmRNA20518| ints6.S	6.91	3	5	5	5	#N/A	0	#N/A	4.05859e+06	#N/A	#N/A	883	99.7083	8.45557
XBXL10_1g24013	XBmRNA44934| serpini2.L	1.72	1	1	1	1	#N/A	0	#N/A	4.05573e+06	#N/A	#N/A	408	45.7497	6.45557
XBXL10_1g917	XBmRNA1377| hmgb2.L	15.09	3	3	3	4	1278.84	2.19543e+06	1716.74	4.04829e+06	3165.6	1.84396	212	24.2069	6.59521
XBXL10_1g40675	XBmRNA76580| ssb.L	9.13	2	4	4	4	854.499	0	0	4.04618e+06	4735.16	>1000	427	48.9662	8.57275
XBXL10_1g1102	XBmRNA1722| anxa5.L	17.65	2	4	4	4	1797.57	0	0	4.02586e+06	2239.62	>1000	323	36.1464	5.2749
XBXL10_1g35220	XBmRNA66488| apool.L	8.97	1	2	2	2	562.231	0	0	3.9979e+06	7110.78	>1000	301	33.3382	5.85889
XBXL10_1g29716	XBmRNA55921| ints8.S	6.05	1	6	6	6	31.4964	0	0	3.99287e+06	126772	>1000	991	112.504	7.1665
XBXL10_1g28396	XBmRNA53350| cyc1.L	35.92	2	5	5	6	#N/A	2.10526e+06	#N/A	3.99077e+06	#N/A	#N/A	309	34.1003	8.5874
XBXL10_1g8557	XBmRNA16159| ints4.L	7.64	1	6	6	6	41.1167	0	0	3.98891e+06	97014.2	>1000	969	109.159	6.31592
XBXL10_1g38026	XBmRNA71873| fmr1.S	11.35	1	1	5	5	49.0661	0	0	3.98294e+06	81175	>1000	564	63.819	7.29834
XBXL10_1g22251	XBmRNA41368| mcm2.S	4.18	2	3	3	3	#N/A	0	#N/A	3.98213e+06	#N/A	#N/A	885	100.016	5.33838
XBXL10_1g42549	XBmRNA79985| lsm14b.S	10.48	2	2	2	2	109.355	0	0	3.98197e+06	36413.3	>1000	420	45.7841	9.36377
XBXL10_1g433	XBmRNA467| dctn1.L	3.36	2	4	4	4	309.287	0	0	3.97473e+06	12851.3	>1000	1310	146.086	5.87158
XBXL10_1g16030	XBmRNA29977| gdi2.S	10.54	6	3	3	4	1027.12	0	0	3.97387e+06	3868.93	>1000	446	50.5153	5.60498
XBXL10_1g1025	XBmRNA1586| abce1.L	3.67	2	2	2	2	344.042	0	0	3.96375e+06	11521.1	>1000	599	67.6132	8.26514
XBXL10_1g39423	XBmRNA74308| pcmtd2.L	13.08	2	4	4	4	10.8011	0	0	3.95609e+06	366267	>1000	367	41.3031	6.72705
XBXL10_1g2235	XBmRNA4130| prmt5.L	1.42	2	1	1	1	258.447	0	0	3.95575e+06	15305.9	>1000	633	72.1002	6.37939
XBXL10_1g3920	XBmRNA7167| plrg1.S	1.93	2	1	1	1	66.228	0	0	3.94643e+06	59588.5	>1000	517	57.5092	8.92432
XBXL10_1g30203	XBmRNA56840| tfam.L	11.97	1	3	3	3	480.079	0	0	3.93633e+06	8199.35	>1000	309	35.4786	10.2134
XBXL10_1g30998	XBmRNA58603| spa17.L	2.16	1	1	1	1	17.6259	0	0	3.93141e+06	223048	>1000	509	57.8944	4.48779
XBXL10_1g43467	XBmRNA81787| gca.S	20.77	1	2	3	3	373.633	0	0	3.9247e+06	10504.2	>1000	207	23.5932	5.80811
XBXL10_1g10575	XBmRNA19826| commd6.S	7.26	1	2	2	2	117.338	0	0	3.92369e+06	33439.3	>1000	234	26.6628	8.33838
XBXL10_1g7113	XBmRNA13329| ppil1.L	23.49	1	3	3	4	435.79	5.16089e+06	11842.6	3.91361e+06	8980.49	0.758321	166	18.119	6.63916
XBXL10_1g13502	XBmRNA25654| anxa4.L	5.3	1	1	1	1	936.158	0	0	3.89548e+06	4161.13	>1000	321	35.7783	6.78564
XBXL10_1g11512	XBmRNA21602| akr1b1.L	9.12	2	3	3	3	739.547	0	0	3.88153e+06	5248.53	>1000	318	35.9405	6.99072
XBXL10_1g15898	XBmRNA29681| cox5a.S	27.7	1	3	3	4	#N/A	3.90158e+06	#N/A	3.86763e+06	#N/A	#N/A	148	16.4665	7.29834
XBXL10_1g4592	XBmRNA8507| hsdl2.S	2.88	1	1	1	1	1779.46	0	0	3.8347e+06	2154.98	>1000	417	44.5307	7.38623
XBXL10_1g15069	XBmRNA28061| slc25a18.S	2.63	5	1	1	1	#N/A	0	#N/A	3.83442e+06	#N/A	#N/A	304	32.5974	9.49561
XBXL10_1g6289	XBmRNA11798| sod1.L	20.53	1	3	3	3	2948.34	5.81995e+06	1973.97	3.83368e+06	1300.28	0.658714	151	15.4085	5.89697
XBXL10_1g31667	XBmRNA59796| rpl28.L	28.47	2	4	4	4	1779.32	0	0	3.82766e+06	2151.19	>1000	137	15.5896	11.7515
XBXL10_1g3003	XBmRNA5398| riok2.L	3.1	2	1	1	1	5.56507	0	0	3.82329e+06	687015	>1000	548	62.1013	5.45264
XBXL10_1g27918	XBmRNA52420| mcm4.L	7.07	2	3	4	4	589.735	0	0	3.80302e+06	6448.7	>1000	863	97.0626	7.04932
XBXL10_1g33441	XBmRNA63117| atad3a.S	15.85	2	9	9	9	61.1342	0	0	3.7884e+06	61968.5	>1000	593	66.8217	8.96826
XBXL10_1g41198	XBmRNA77744| aimp2.L	7.4	1	1	3	4	63.3615	1.96249e+06	30972.9	3.78575e+06	59748.5	1.92906	311	34.5496	6.07471
XBXL10_1g4749	XBmRNA8817| haus6.S	2.65	1	2	3	3	39.9396	0	0	3.77399e+06	94492.4	>1000	981	110.498	6.44287
XBXL10_1g32244	XBmRNA60742| capzb.L	18.05	2	3	3	3	694.834	0	0	3.77079e+06	5426.89	>1000	277	31.4299	5.59229
XBXL10_1g18241	XBmRNA33620| ints5.L	3.83	2	4	4	4	10.5117	0	0	3.76037e+06	357733	>1000	939	102.55	7.23975
XBXL10_1g2717	XBmRNA4775| mapk1.L	4.43	2	2	2	2	#N/A	0	#N/A	3.75116e+06	#N/A	#N/A	361	41.2661	6.87354
XBXL10_1g10703	XBmRNA20106| myl6.S	34.44	3	4	4	7	640.35	2.69131e+06	4202.87	3.72402e+06	5815.61	1.38372	151	16.9643	4.50049
XBXL10_1g19481	XBmRNA36009| rtca.L	8.77	1	3	3	3	534.155	0	0	3.72062e+06	6965.43	>1000	365	39.1044	7.94287
XBXL10_1g11551	XBmRNA21659| atp6v1e1.L	19.47	2	6	6	8	947.215	2.37247e+06	2504.68	3.684e+06	3889.29	1.55281	226	25.8868	8.48486
XBXL10_1g7148	XBmRNA13412| mov10.L	5.41	1	4	4	4	253.362	0	0	3.67957e+06	14522.9	>1000	999	113.585	8.44092
XBXL10_1g37762	XBmRNA71375| hcfc1.S	3.95	2	7	7	7	133.827	0	0	3.67392e+06	27452.8	>1000	2101	218.931	6.25244
XBXL10_1g43903	XBmRNA82623| aimp2.S	11.25	1	1	3	3	246.326	1.96249e+06	7967.03	3.66459e+06	14877	1.86732	311	34.4025	5.85889
XBXL10_1g24221	XBmRNA45357| yeats2.L	3.32	1	3	3	3	7.83364	0	0	3.66184e+06	467450	>1000	1235	132.596	8.19189
XBXL10_1g31142	XBmRNA58911| dlat.L	3.82	1	1	2	2	285.245	0	0	3.6525e+06	12804.8	>1000	628	66.8212	8.82178
XBXL10_1g29436	XBmRNA55338| ptpn2.S	6.2	1	2	3	3	18.5094	0	0	3.64188e+06	196759	>1000	468	54.177	7.21045
XBXL10_1g29695	XBmRNA55891| cox6c.S	29.11	2	2	2	3	1579.23	4.38289e+06	2775.34	3.63508e+06	2301.81	0.82938	79	8.85664	9.93506
XBXL10_1g38395	XBmRNA72532| actn4.S	6.37	2	3	5	5	513.11	0	0	3.5925e+06	7001.42	>1000	926	106.553	5.31299
XBXL10_1g2159	XBmRNA3968| habp4.L	12.68	1	5	5	5	1645.8	0	0	3.5787e+06	2174.45	>1000	418	46.8794	7.56201
XBXL10_1g17136	XBmRNA31768| carm1.S	4.65	1	2	2	3	622.142	3.18875e+06	5125.43	3.57651e+06	5748.7	1.1216	602	65.9164	6.44287
XBXL10_1g10808	XBmRNA20337| pfkm.S	6.93	2	4	4	4	482.5	0	0	3.55737e+06	7372.78	>1000	808	88.2418	7.62061
XBXL10_1g5161	XBmRNA9601| coro1c.S	3.13	2	2	2	2	284.518	0	0	3.53079e+06	12409.7	>1000	480	53.7709	6.16357
XBXL10_1g30362	XBmRNA57198| atp5mk.L	59.32	1	4	4	5	359.117	1.29964e+06	3618.98	3.5265e+06	9819.92	2.71345	59	6.56745	9.90576
XBXL10_1g10812	XBmRNA20346| gtf2h4.S	12.09	1	3	3	3	9.79256	0	0	3.52383e+06	359848	>1000	455	51.8811	8.55811
XBXL10_1g1318	XBmRNA2183| anxa3.L	7.74	2	2	2	2	1180.76	0	0	3.47359e+06	2941.83	>1000	323	35.7603	5.99854
XBXL10_1g42089	XBmRNA79134| eif3c.L	3.12	2	2	2	2	521.041	0	0	3.45797e+06	6636.64	>1000	929	107.233	5.87158
XBXL10_1g29022	XBmRNA54602| stt3b.S	2.8	2	2	3	3	13.1392	0	0	3.43735e+06	261610	>1000	820	92.5181	8.82178
XBXL10_1g25672	XBmRNA47986| eif4g1.S	1.49	1	1	2	2	354.592	0	0	3.42261e+06	9652.24	>1000	1609	178.629	5.21143
XBXL10_1g31024	XBmRNA58645| xl64phr	7.79	1	3	3	3	56.4394	0	0	3.41256e+06	60464.2	>1000	526	60.5923	9.20264
XBXL10_1g31544	XBmRNA59636| ndufa3.L	10.47	2	1	1	1	830.144	0	0	3.39945e+06	4095.01	>1000	86	9.31082	8.45557
XBXL10_1g16020	XBmRNA29960| chchd3.S	6.91	2	2	2	4	470.128	2.50076e+06	5319.31	3.3985e+06	7228.87	1.35899	246	28.0434	8.5874
XBXL10_1g7157	XBmRNA13429| ddx20.L	1.03	1	1	1	1	159.224	0	0	3.38478e+06	21257.9	>1000	775	86.5494	7.23975
XBXL10_1g31896	XBmRNA60203| LOC108696787	0.73	4	1	1	1	47.1074	0	0	3.38385e+06	71832.6	>1000	956	105.954	6.90283
XBXL10_1g24507	XBmRNA45844| cdc5l.L	2.36	2	2	2	2	124.849	0	0	3.37503e+06	27032.9	>1000	804	91.7214	7.18115
XBXL10_1g2760	XBmRNA4865| LOC108716231	3.14	3	7	7	8	5.92441	0	0	3.34329e+06	564325	>1000	2931	321.092	9.24658
XBXL10_1g41424	XBmRNA78162| shmt1.L	5.57	1	1	1	1	1064.7	0	0	3.33655e+06	3133.81	>1000	485	53.7172	7.2251
XBXL10_1g34133	XBmRNA64388| ssna1.L	18.1	1	2	2	2	112.647	0	0	3.30097e+06	29303.8	>1000	116	13.2317	6.15088
XBXL10_1g40372	XBmRNA75906| actr3.L	12.44	2	4	4	4	396.122	0	0	3.2739e+06	8264.89	>1000	418	47.2319	5.99854
XBXL10_1g34623	XBmRNA65420| kif14l.L	3.9	1	5	5	6	170.871	0	0	3.2575e+06	19064.1	>1000	1540	172.716	6.82959
XBXL10_1g26291	XBmRNA49134| ints9.S	5.02	1	3	3	3	47.7086	0	0	3.24539e+06	68025.2	>1000	658	74.0288	6.63916
XBXL10_1g2863	XBmRNA5107| aldh2.L	5.37	1	2	2	2	1720.15	0	0	3.24533e+06	1886.66	>1000	521	57.2133	7.6499
XBXL10_1g27900	XBmRNA52377| mcm3.L	8.05	1	5	5	5	739.844	0	0	3.24271e+06	4382.96	>1000	807	90.349	6.78564
XBXL10_1g6073	XBmRNA11337| ndufb4.L	7.81	2	1	1	1	912.317	0	0	3.23891e+06	3550.2	>1000	128	15.16	9.979
XBXL10_1g31264	XBmRNA59144| LOC108696560	4.83	1	3	3	3	76.4995	0	0	3.19753e+06	41798.1	>1000	600	68.0348	8.14795
XBXL10_1g566	XBmRNA592| rpia.L	18.3	1	3	3	3	1580.5	0	0	3.19752e+06	2023.1	>1000	235	25.6623	6.55127
XBXL10_1g6819	XBmRNA12753| trim33.L	1.19	2	1	1	1	14.5107	0	0	3.19601e+06	220253	>1000	1091	120.056	6.62451
XBXL10_1g7379	XBmRNA13887| ndufs5.L	15.38	1	2	2	2	928.644	0	0	3.19507e+06	3440.57	>1000	104	12.4152	8.44092
XBXL10_1g13158	XBmRNA24927| LOC398162	5.38	1	2	2	2	16.2798	0	0	3.16658e+06	194509	>1000	390	43.7335	8.19189
XBXL10_1g4000	XBmRNA7312| fat4.S	0.16	1	1	1	1	#N/A	0	#N/A	3.16567e+06	#N/A	#N/A	4958	540.289	4.94482
XBXL10_1g19980	XBmRNA36974| sec61a1.L	1.47	2	1	1	1	187.821	0	0	3.16514e+06	16851.9	>1000	476	52.1734	8.06006
XBXL10_1g38276	XBmRNA72329| crat.S	8.52	2	4	4	4	148.992	0	0	3.15531e+06	21177.7	>1000	610	68.8073	7.1665
XBXL10_1g6491	XBmRNA12181| pipox.L	3.05	1	1	1	1	96.4229	0	0	3.14872e+06	32655.3	>1000	393	43.9248	8.27979
XBXL10_1g19334	XBmRNA35733| arpc5.L	8	2	1	1	1	479.811	0	0	3.14184e+06	6548.08	>1000	150	16.3894	5.40186
XBXL10_1g33354	XBmRNA62933| btg4.S	19.31	2	4	4	4	30.6954	1.63682e+06	53324.5	3.13565e+06	102154	1.9157	233	26.9284	9.17334
XBXL10_1g37585	XBmRNA70963| gsn.S	11.05	1	2	6	6	1074.78	1.55561e+06	1447.37	3.12885e+06	2911.14	2.01133	751	82.6341	5.38916
XBXL10_1g42970	XBmRNA80766| LOC108702761	21.88	1	2	2	2	371.129	0	0	3.1147e+06	8392.5	>1000	96	10.8827	7.18115
XBXL10_1g28957	XBmRNA54481| cbx3.S	12.07	2	2	2	3	#N/A	1.04823e+06	#N/A	3.11383e+06	#N/A	#N/A	174	19.8498	5.12256
XBXL10_1g6687	XBmRNA12534| ywhae.L	10.59	3	2	3	3	1550.72	0	0	3.10467e+06	2002.08	>1000	255	29.1695	4.77979
XBXL10_1g27407	XBmRNA51396| pdcd6ip.L	3.78	1	3	3	3	716.133	2.50126e+06	3492.73	3.10161e+06	4331.05	1.24002	872	96.8862	6.0874
XBXL10_1g7713	XBmRNA14542| LOC108708404	1.51	1	1	1	1	#N/A	0	#N/A	3.0998e+06	#N/A	#N/A	529	61.3037	7.06396
XBXL10_1g12406	XBmRNA23189| brd8.L	2.23	2	2	2	2	13.43	0	0	3.09895e+06	230749	>1000	895	97.613	4.7417
XBXL10_1g43346	XBmRNA81486| ccnt2.S	8.06	2	4	4	4	2.69063	0	0	3.09836e+06	1.15154e+06	>1000	720	80.5841	8.89502
XBXL10_1g43739	XBmRNA82336| pdap1.S	11.3	1	3	3	4	1047.36	2.90125e+06	2770.07	3.07722e+06	2938.08	1.06065	177	19.778	8.30908
XBXL10_1g34214	XBmRNA64538| edf1.L	28.57	2	5	5	5	241.598	1.61189e+06	6671.78	3.05308e+06	12637	1.8941	147	16.3106	9.78857
XBXL10_1g1222	XBmRNA1971| eif4e.L	6.57	3	1	2	2	260.136	0	0	3.05198e+06	11732.2	>1000	213	24.5972	6.15088
XBXL10_1g10209	XBmRNA19096| ints2.S	3.66	1	4	4	4	13.5104	0	0	3.04305e+06	225239	>1000	1175	130.851	6.59521
XBXL10_1g30591	XBmRNA57625| dnajc9.L	14.5	1	2	2	2	411.936	0	0	3.0388e+06	7376.88	>1000	262	30.4714	5.89697
XBXL10_1g24142	XBmRNA45158| commd2.L	8.54	2	2	2	3	48.4989	0	0	3.03854e+06	62651.6	>1000	199	22.9602	7.00537
XBXL10_1g38478	XBmRNA72677| vps18.S	5.48	1	5	5	5	82.3149	0	0	3.02674e+06	36770.2	>1000	968	111.536	6.12549
XBXL10_1g19958	XBmRNA36930| LOC108714654	11.56	1	5	5	7	80.141	0	0	3.01953e+06	37677.8	>1000	398	44.2046	7.21045
XBXL10_1g40438	XBmRNA76054| LOC108701257	2.48	1	2	2	2	6.94256	0	0	2.99079e+06	430791	>1000	886	96.7699	7.62061
XBXL10_1g27570	XBmRNA51717| LOC108719110	8.61	2	2	2	2	#N/A	0	#N/A	2.98919e+06	#N/A	#N/A	209	23.4774	6.84424
XBXL10_1g23781	XBmRNA44425| eif4g1.L	1	1	1	2	2	177.904	0	0	2.98715e+06	16790.8	>1000	1606	178.398	5.21143
XBXL10_1g19819	XBmRNA36655| gpx1.L	7.8	2	2	2	2	516.89	0	0	2.97892e+06	5763.16	>1000	205	23.4778	8.01611
XBXL10_1g30765	XBmRNA58022| ndufa13.L	22.92	1	3	3	3	1029.24	8.29647e+06	8060.81	2.9587e+06	2874.66	0.356622	144	16.9638	9.72998
XBXL10_1g4388	XBmRNA8168| ndufs7.S	5.03	2	1	1	1	25.5282	0	0	2.95298e+06	115675	>1000	179	20.3213	9.62744
XBXL10_1g40333	XBmRNA75822| kpna2.L	10.27	1	1	3	3	212.646	0	0	2.95025e+06	13874	>1000	526	57.5937	5.35107
XBXL10_1g42043	XBmRNA79044| kif22.L	7.83	2	5	5	5	66.2489	0	0	2.93026e+06	44231.1	>1000	651	73.1651	9.42236
XBXL10_1g1620	XBmRNA2881| mllt1.L	1.43	1	1	1	1	2.30385	0	0	2.91191e+06	1.26393e+06	>1000	558	62.3181	8.76318
XBXL10_1g16408	XBmRNA30819| LOC108713228	9.22	2	2	3	3	125.557	3.69271e+06	29410.6	2.89365e+06	23046.5	0.783611	217	24.9679	8.99756
XBXL10_1g34745	XBmRNA65682| aifm1.L	12.4	1	6	6	7	768.386	1.61554e+06	2102.51	2.88078e+06	3749.13	1.78317	637	69.78	7.43018
XBXL10_1g38017	XBmRNA71862| LOC108700119	10.67	2	3	3	3	#N/A	0	#N/A	2.87678e+06	#N/A	#N/A	225	26.1167	8.32373
XBXL10_1g40475	XBmRNA76145| krt18.3.L	2.38	2	1	1	1	#N/A	0	#N/A	2.86395e+06	#N/A	#N/A	378	42.9578	5.19873
XBXL10_1g5290	XBmRNA9837| ppil2.S	16.51	1	7	7	8	66.908	0	0	2.85373e+06	42651.6	>1000	521	59.1918	8.68994
XBXL10_1g5139	XBmRNA9553| ewsr1.L	4.77	2	2	2	3	7.90822	0	0	2.84889e+06	360245	>1000	671	70.6001	9.23193
XBXL10_1g40456	XBmRNA76094| ercc3.L	1.02	1	1	1	1	14.6504	0	0	2.83682e+06	193634	>1000	785	89.4932	7.10791
XBXL10_1g40707	XBmRNA76651| ola1.L	3.79	1	1	1	1	510.308	0	0	2.83589e+06	5557.2	>1000	396	44.9213	7.51807
XBXL10_1g19714	XBmRNA36470| adsl.L	1.79	1	1	1	1	1197.75	0	0	2.82801e+06	2361.11	>1000	503	57.1101	6.94678
XBXL10_1g12170	XBmRNA22779| hnrnpab.L	2.47	2	1	1	1	189.496	0	0	2.82177e+06	14890.9	>1000	324	35.749	5.98584
XBXL10_1g33365	XBmRNA62948| LOC108705521	2.53	1	1	2	2	691.81	0	0	2.81445e+06	4068.23	>1000	632	67.2915	8.70459
XBXL10_1g41090	XBmRNA77533| ndufb7.L	44.83	1	3	3	4	549.464	3.91035e+06	7116.65	2.80267e+06	5100.73	0.716732	116	13.9407	7.47412
XBXL10_1g15477	XBmRNA28916| tia1.S	2.06	2	1	1	1	30.0777	0	0	2.80264e+06	93180	>1000	388	42.6078	7.72314
XBXL10_1g31899	XBmRNA60207| pold1.L	1.44	1	2	2	2	276.817	0	0	2.79678e+06	10103.4	>1000	1109	125.338	7.56201
XBXL10_1g32784	XBmRNA61865| LOC108697935	15.92	1	2	2	2	774.583	0	0	2.79382e+06	3606.87	>1000	201	22.7135	9.14404
XBXL10_1g32283	XBmRNA60815| rcc2.L	4.48	1	2	2	2	235.04	0	0	2.78614e+06	11853.9	>1000	513	55.4611	8.92432
XBXL10_1g22455	XBmRNA41812| acad9.S	10.77	1	5	5	5	1031.68	0	0	2.7808e+06	2695.4	>1000	622	68.3161	7.31299
XBXL10_1g32398	XBmRNA61122| eif3a.S	8.77	2	6	6	6	569.574	0	0	2.77436e+06	4870.94	>1000	1414	167.274	6.93213
XBXL10_1g2424	XBmRNA4237| dnaja4.1.L	12.59	1	3	4	4	78.4836	0	0	2.75497e+06	35102.6	>1000	397	44.7115	6.65381
XBXL10_1g1104	XBmRNA1724| hadh.L	3.51	1	1	1	1	1641.65	0	0	2.75369e+06	1677.39	>1000	313	34.2918	8.55811
XBXL10_1g41448	XBmRNA78221| stub1.L	6.8	1	2	2	2	56.7819	0	0	2.75015e+06	48433.7	>1000	309	35.1576	6.37939
XBXL10_1g41810	XBmRNA78737| rnf112.L	3.92	1	2	2	2	64.7239	0	0	2.74446e+06	42402.5	>1000	612	68.529	6.82959
XBXL10_1g25256	XBmRNA47142| gnpat.S	5.99	3	5	5	5	106.5	0	0	2.74404e+06	25765.6	>1000	668	76.1894	7.88428
XBXL10_1g37187	XBmRNA70159| dlgap5.S	1.95	1	2	2	2	178.189	0	0	2.74389e+06	15398.7	>1000	871	96.4268	6.99072
XBXL10_1g6313	XBmRNA11854| mrpl39.L	4.24	1	1	1	2	385.911	0	0	2.74058e+06	7101.59	>1000	354	40.3695	7.91357
XBXL10_1g29594	XBmRNA55713| cops5.S	2.11	1	1	1	1	426.623	0	0	2.72546e+06	6388.45	>1000	332	37.4867	6.53662
XBXL10_1g23319	XBmRNA43477| dynlt1.L	15.93	1	1	1	1	454.663	0	0	2.71261e+06	5966.19	>1000	113	12.5261	5.08447
XBXL10_1g21995	XBmRNA40872| aldh9a1.S	9.65	1	4	4	4	823.377	0	0	2.71203e+06	3293.79	>1000	518	56.1264	6.94678
XBXL10_1g3605	XBmRNA6595| suclg1.S	2.77	1	1	1	1	1215.42	0	0	2.71012e+06	2229.78	>1000	325	34.318	9.37842
XBXL10_1g9305	XBmRNA17385| ttf2.S	4.8	1	5	5	5	92.727	0	0	2.70622e+06	29184.8	>1000	1188	131.757	8.60205
XBXL10_1g36899	XBmRNA69575| LOC108699158	7.37	2	2	2	2	358.861	0	0	2.70553e+06	7539.23	>1000	285	31.1367	5.21143
XBXL10_1g42051	XBmRNA79061| ppp4c.L	6.19	1	2	2	2	461.69	0	0	2.68211e+06	5809.32	>1000	307	35.1005	5.12256
XBXL10_1g36828	XBmRNA69471| tagln2.L	21.32	2	3	3	3	1625.01	0	0	2.67409e+06	1645.58	>1000	197	21.7759	8.90967
XBXL10_1g30778	XBmRNA58065| LOC121393051	26.52	2	3	3	3	#N/A	0	#N/A	2.67303e+06	#N/A	#N/A	132	15.3154	10.9165
XBXL10_1g19216	XBmRNA35513| LOC121403053	1.56	1	1	1	1	#N/A	0	#N/A	2663111	#N/A	#N/A	512	59.1261	6.88818
XBXL10_1g3223	XBmRNA5836| nnt.L	2.76	2	3	3	3	911.148	0	0	2.66077e+06	2920.24	>1000	1086	113.927	7.06396
XBXL10_1g35164	XBmRNA66389| fmr1.L	11.35	1	1	5	5	111.161	0	0	2.65598e+06	23893	>1000	564	63.743	7.31299
XBXL10_1g1005	XBmRNA1564| ednra.L	1.69	1	1	1	1	#N/A	0	#N/A	2.6378e+06	#N/A	#N/A	415	46.9491	8.83643
XBXL10_1g25683	XBmRNA48004| ap2m1.S	1.61	2	1	1	1	129.797	0	0	2.62994e+06	20261.9	>1000	435	49.653	9.5249
XBXL10_1g1447	XBmRNA2514| plin3.L	5.4	1	2	3	3	439.491	0	0	2.62151e+06	5964.88	>1000	426	46.6493	5.30029
XBXL10_1g12988	XBmRNA24583| LOC108711290	0.7	1	1	2	2	34.4073	0	0	2.61536e+06	76011.8	>1000	2567	274.795	5.66846
XBXL10_1g3335	XBmRNA6078| acaa2.L	7.3	2	3	3	4	1392.53	0	0	2.59783e+06	1865.55	>1000	397	41.8797	7.75244
XBXL10_1g40427	XBmRNA76031| pdia5.L	8.99	2	4	4	4	285.21	0	0	2.59425e+06	9095.93	>1000	523	59.6142	8.03076
XBXL10_1g28187	XBmRNA52932| rida.L	18.71	1	2	2	3	2680.8	2.5169e+06	938.861	2.58267e+06	963.395	1.02613	139	14.6187	6.66846
XBXL10_1g9782	XBmRNA18295| mpc2.S	16.92	1	2	2	2	563.957	2.42382e+06	4297.88	2.56813e+06	4553.77	1.05954	130	14.4727	10.228
XBXL10_1g12690	XBmRNA23807| ing3.L	5.05	2	1	1	1	10.5031	0	0	2.55148e+06	242927	>1000	416	46.1541	6.48096
XBXL10_1g5232	XBmRNA9710| mlec.S	9.06	2	2	2	2	102.037	3.47029e+06	34009.9	2.54106e+06	24903.2	0.732234	276	30.6687	5.66846
XBXL10_1g32461	XBmRNA61271| LOC108697348	0.43	2	1	1	1	19.4977	0	0	2.53594e+06	130064	>1000	1877	212.906	5.97314
XBXL10_1g34044	XBmRNA64187| sdhb.S	8.71	2	2	2	2	1010.35	0	0	2.52641e+06	2500.53	>1000	287	32.3011	8.60205
XBXL10_1g29565	XBmRNA55634| LOC108695307	2.43	6	1	1	1	#N/A	0	#N/A	2.52194e+06	#N/A	#N/A	536	58.7554	7.32764
XBXL10_1g1885	XBmRNA3364| exosc3.L	5.6	1	1	1	1	84.9594	0	0	2.51226e+06	29570.1	>1000	250	27.2242	7.7085
XBXL10_1g8122	XBmRNA15369| mars1.L	3.06	2	3	3	3	212.368	0	0	2.49152e+06	11732.1	>1000	916	103.567	6.85889
XBXL10_1g21015	XBmRNA38877| eif4g2.S	7.72	2	6	6	6	45.2989	0	0	2.4904e+06	54977	>1000	894	100.997	7.48877
XBXL10_1g28195	XBmRNA52944| mtdh.L	3.52	2	2	2	2	167.808	0	0	2.48894e+06	14832.1	>1000	597	65.5463	8.54346
XBXL10_1g27417	XBmRNA51427| sdha.L	3.31	2	2	2	2	1075.79	0	0	2.48617e+06	2311.01	>1000	665	72.8082	7.25439
XBXL10_1g2857	XBmRNA5093| LOC108716875	10.75	1	2	2	2	368.776	0	0	2.47993e+06	6724.76	>1000	186	20.8839	7.00537
XBXL10_1g34489	XBmRNA65159| ubl4a.S	49.32	2	8	8	10	438.859	1.12568e+07	25650.2	2.47554e+06	5640.87	0.219915	148	16.5797	7.12256
XBXL10_1g38200	XBmRNA72165| opa3.S	4.67	2	1	1	1	67.7858	0	0	2.46331e+06	36339.6	>1000	150	16.7278	9.15869
XBXL10_1g2953	XBmRNA5276| hsd17b4.L	0.94	1	1	1	1	431.591	0	0	2.45993e+06	5699.69	>1000	741	80.2812	7.56201
XBXL10_1g28796	XBmRNA54164| commd3.S	9.74	1	2	2	2	57.5381	0	0	2.45984e+06	42751.6	>1000	195	22.043	5.90967
XBXL10_1g4381	XBmRNA8149| thop1.S	1.46	2	1	1	1	606.691	0	0	2.45651e+06	4049.03	>1000	683	78.1005	5.96045
XBXL10_1g26245	XBmRNA49062| cd2ap.S	1.36	2	1	1	1	19.7686	0	0	2.41884e+06	122358	>1000	733	81.0823	6.3667
XBXL10_1g37404	XBmRNA70601| cipc.S	6.36	1	2	2	2	7.67906	0	0	2.39029e+06	311274	>1000	346	38.0881	8.66064
XBXL10_1g5293	XBmRNA9841| ufd1.S	15.64	2	4	4	4	140.979	0	0	2.38392e+06	16909.7	>1000	307	34.8354	5.96045
XBXL10_1g35453	XBmRNA66945| ehmt2.L	0.79	3	1	1	1	29.0981	0	0	2.37463e+06	81607.5	>1000	1134	125.402	5.80811
XBXL10_1g39817	XBmRNA74920| vat1.L	3.37	2	1	1	1	643.541	0	0	2.34942e+06	3650.77	>1000	445	48.6129	6.25244
XBXL10_1g21050	XBmRNA38969| copb1.S	5.67	2	4	4	4	127.487	0	0	2.33187e+06	18291	>1000	953	106.856	6.04932
XBXL10_1g19443	XBmRNA35930| LOC108714405	4.52	1	1	1	1	38.6794	0	0	2.31477e+06	59845	>1000	332	37.3382	7.56201
XBXL10_1g35497	XBmRNA67038| LOC108698575	3.7	2	3	3	3	351.223	0	0	2.30851e+06	6572.79	>1000	1243	140.753	7.32764
XBXL10_1g11448	XBmRNA21489| LOC108710728	2.34	2	4	4	4	6.62427	0	0	2.30645e+06	348182	>1000	1877	205.476	7.57666
XBXL10_1g43227	XBmRNA81257| kpna2.S	10.08	1	1	3	3	268.067	0	0	2.30194e+06	8587.19	>1000	526	57.5177	5.49072
XBXL10_1g43842	XBmRNA82518| eif3b.S	4.66	2	3	3	3	303.444	0	0	2.30135e+06	7584.09	>1000	687	79.951	5.18604
XBXL10_1g9405	XBmRNA17534| LOC121400470	4.97	11	1	1	1	#N/A	0	#N/A	2.27765e+06	#N/A	#N/A	181	20.6532	5.65576
XBXL10_1g18219	XBmRNA33566| rcor2.L	2.98	1	1	1	1	58.5904	0	0	2.27683e+06	38860.1	>1000	503	56.0514	7.56201
XBXL10_1g12326	XBmRNA23037| sfxn1.L	7.76	1	2	2	2	573.779	0	0	2269234	3954.89	>1000	322	35.6284	9.31982
XBXL10_1g27819	XBmRNA52248| myl12b.L	10.47	4	2	2	2	601.519	0	0	2.26375e+06	3763.39	>1000	172	19.8325	4.80518
XBXL10_1g18748	XBmRNA34572| nip7.L	13.33	1	3	3	3	65.4061	0	0	2.25028e+06	34404.7	>1000	180	20.5296	8.90967
XBXL10_1g2874	XBmRNA5130| LOC108716941	1.98	1	1	1	1	43.8567	0	0	2.25017e+06	51307.3	>1000	606	68.2742	6.56592
XBXL10_1g20766	XBmRNA38234| ddb1.S	2.72	1	2	2	2	265.334	0	0	2.24302e+06	8453.55	>1000	1140	126.752	5.23682
XBXL10_1g2827	XBmRNA5039| vps33a.L	9.98	2	5	5	5	6.03961	0	0	2.2411e+06	371067	>1000	601	68.1475	7.03467
XBXL10_1g40989	XBmRNA77321| hspe1.L	7.84	2	1	1	1	3038.48	0	0	2.23061e+06	734.12	>1000	102	11.0911	8.92432
XBXL10_1g6868	XBmRNA12868| rpa2.L	7.25	2	2	2	2	303.213	0	0	2.21127e+06	7292.8	>1000	276	29.4291	6.04932
XBXL10_1g24605	XBmRNA45994| rab10.L	3.5	3	1	1	1	#N/A	0	#N/A	2.20393e+06	#N/A	>1000	200	22.5546	8.38232
XBXL10_1g22810	XBmRNA42491| capn11.L	2.98	2	2	2	2	239.887	0	0	2.18724e+06	9117.79	>1000	704	79.7692	4.97021
XBXL10_1g38401	XBmRNA72543| pak4.S	1.24	2	1	1	1	#N/A	0	#N/A	2.17009e+06	#N/A	>1000	646	73.0376	9.67139
XBXL10_1g7908	XBmRNA14947| uchl3.L	9.57	2	2	2	2	1569.54	0	0	2.16586e+06	1379.93	>1000	230	26.1542	5.03369
XBXL10_1g22193	XBmRNA41257| rpl29.S	16	1	1	1	1	1238.62	0	0	2.16381e+06	1746.95	>1000	75	8.56559	11.605
XBXL10_1g35925	XBmRNA67896| rcor1.L	5.32	2	2	2	2	23.7071	0	0	2.15838e+06	91043.4	>1000	432	49.1196	6.34131
XBXL10_1g40827	XBmRNA76940| acadl.L	5.41	1	2	2	2	1264.1	0	0	2.15061e+06	1701.3	>1000	444	49.2429	7.95752
XBXL10_1g28238	XBmRNA53044| eif3e.L	6.73	2	2	2	2	495.111	0	0	2.13809e+06	4318.4	>1000	446	52.1935	6.27783
XBXL10_1g894	XBmRNA1337| cdkn2aip.L	5.53	2	3	3	3	#N/A	0	#N/A	2.12924e+06	#N/A	>1000	398	44.7657	8.19189
XBXL10_1g34069	XBmRNA64263| LOC108697842	3.34	1	2	2	2	22.3604	0	0	2.12659e+06	95104.8	>1000	599	68.3862	8.92432
XBXL10_1g43634	XBmRNA82144| ehhadh.S	1.79	1	1	1	1	236.839	0	0	2.12529e+06	8973.57	>1000	727	79.3365	8.82178
XBXL10_1g21393	XBmRNA39593| lsm14a.S	2.34	1	1	1	1	109.097	0	0	2.1136e+06	19373.6	>1000	471	51.2375	9.45166
XBXL10_1g28698	XBmRNA53930| gars1.S	8.11	2	5	5	6	191.23	0	0	2.08456e+06	10900.8	>1000	740	83.5928	7.15186
XBXL10_1g15887	XBmRNA29654| znf609.S	0.49	2	1	1	1	13.822	0	0	2.0762e+06	150210	>1000	1427	152.306	7.88428
XBXL10_1g7488	XBmRNA14112| glod4.L	4.36	1	1	1	1	616.783	0	0	2.07452e+06	3363.45	>1000	298	33.3717	6.02393
XBXL10_1g12991	XBmRNA24586| vps13c.L	0.53	1	2	2	2	130.478	0	0	2.06537e+06	15829.2	>1000	3768	425.361	6.58057
XBXL10_1g16518	XBmRNA31018| hspa4.S	4.78	2	4	4	4	188.508	0	0	2.05064e+06	10878.3	>1000	836	93.7374	5.2749
XBXL10_1g36063	XBmRNA68202| mideas.L	0.74	2	1	1	1	5.63075	0	0	2.04777e+06	363676	>1000	1080	120.211	9.01221
XBXL10_1g26445	XBmRNA49390| abcf2.L	8.07	2	4	4	4	43.8812	0	0	2.03872e+06	46460.1	>1000	607	69.0693	7.07861
XBXL10_1g30668	XBmRNA57836| sgpl1.L	3.32	1	2	2	3	155.26	0	0	2.03089e+06	13080.6	>1000	573	63.6248	8.98291
XBXL10_1g40465	XBmRNA76120| xrcc5.L	4.27	1	2	2	2	219.292	0	0	2.01841e+06	9204.22	>1000	726	82.2284	5.04639
XBXL10_1g23143	XBmRNA43106| LOC108716684	2.76	2	1	1	1	95.8952	0	0	2.01374e+06	20999.4	>1000	544	57.6158	8.63135
XBXL10_1g18916	XBmRNA34857| sf3b3.L	0.9	2	1	1	1	179.764	0	0	2.00442e+06	11150.3	>1000	1217	135.474	5.23682
XBXL10_1g29906	XBmRNA56298| cfap20.S	4.66	1	1	1	1	131.994	0	0	1.96785e+06	14908.7	>1000	193	22.7199	9.75928
XBXL10_1g24989	XBmRNA46616| nek2.S	1.81	13	1	1	1	17.8497	0	0	1.96463e+06	110065	>1000	442	51.9616	8.51416
XBXL10_1g33161	XBmRNA62626| chek1.S	2.32	2	1	1	1	36.4091	0	0	1.95968e+06	53824	>1000	474	53.7645	7.95752
XBXL10_1g3282	XBmRNA5946| tars1.L	1.39	1	1	1	1	377.549	0	0	1.95803e+06	5186.15	>1000	721	82.8006	7.02002
XBXL10_1g1336	XBmRNA2216| cops4.L	11.82	2	4	4	4	599.414	0	0	1.94819e+06	3250.17	>1000	406	46.3198	5.84619
XBXL10_1g26676	XBmRNA49846| LOC108718674	17.92	2	3	3	3	331.985	0	0	1.94803e+06	5867.82	>1000	173	20.291	8.47021
XBXL10_1g39035	XBmRNA73623| npepps.L	6.93	2	6	6	6	693.891	0	0	1.94707e+06	2806.02	>1000	953	106.765	5.51611
XBXL10_1g1743	XBmRNA3078| bsg.L	2.84	2	1	1	1	134.382	0	0	1.93554e+06	14403.2	>1000	387	42.6383	5.21143
XBXL10_1g8092	XBmRNA15303| naca.L	2.79	2	2	2	2	561.665	0	0	1.91046e+06	3401.41	>1000	1002	102.151	8.70459
XBXL10_1g2170	XBmRNA3996| sass6.L	2.54	1	1	1	1	74.1055	0	0	1.90289e+06	25678.1	>1000	668	75.0831	8.29443
XBXL10_1g10581	XBmRNA19839| pibf1.S	3.31	1	3	3	3	8.59084	0	0	1.89395e+06	220461	>1000	755	89.4764	6.37939
XBXL10_1g40581	XBmRNA76345| orc4.L	14.35	1	3	3	3	159.416	0	0	1.89298e+06	11874.5	>1000	432	49.393	8.80713
XBXL10_1g2204	XBmRNA4069| psme2.L	4.13	3	1	1	1	242.199	0	0	1.87448e+06	7739.41	>1000	242	28.0745	5.46533
XBXL10_1g18912	XBmRNA34848| exosc6.L	8.58	1	2	2	2	115.345	0	0	1.87076e+06	16218.8	>1000	268	28.5075	5.79541
XBXL10_1g24037	XBmRNA44959| smc4.L	2.33	1	3	3	3	160.281	0	0	1.86549e+06	11638.9	>1000	1290	146.942	7.26904
XBXL10_1g21865	XBmRNA40586| agl.S	0.59	1	1	1	1	294.296	0	0	1.86303e+06	6330.46	>1000	1532	174.129	6.96143
XBXL10_1g26372	XBmRNA49272| tmem214.S	1.18	2	1	1	1	77.3214	0	0	1.8599e+06	24054.1	>1000	679	76.7224	8.92432
XBXL10_1g10670	XBmRNA20044| arf3.S	18.23	6	2	2	2	#N/A	0	#N/A	1.85924e+06	#N/A	>1000	181	20.5877	7.43018
XBXL10_1g11375	XBmRNA21377| endoul.L	8.9	1	2	2	2	626.371	0	0	1.84652e+06	2947.96	>1000	292	33.7869	6.7124
XBXL10_1g18455	XBmRNA33912| pc.1.L	1.95	4	2	2	2	258.019	0	0	1.84577e+06	7153.61	>1000	1177	130.011	6.93213
XBXL10_1g18934	XBmRNA34889| csnk2a2.L	2.58	2	1	1	1	59.8796	0	0	1.84539e+06	30818.3	>1000	349	41.2612	8.47021
XBXL10_1g1495	XBmRNA2619| wrn.L	0.49	1	1	1	1	63.1945	0	0	1.82467e+06	28873.9	>1000	1434	160.966	6.50732
XBXL10_1g1903	XBmRNA3393| ncln.L	1.43	2	1	1	1	92.2271	0	0	1.81337e+06	19662	>1000	560	63.3505	6.45557
XBXL10_1g23352	XBmRNA43583| hddc2.L	10.95	1	2	2	2	171.135	0	0	1.81039e+06	10578.8	>1000	201	23.0946	6.07471
XBXL10_1g1945	XBmRNA3457| ptgr1.1.L	3.04	1	1	1	1	1522.29	0	0	1.79796e+06	1181.09	>1000	329	36.0333	6.91748
XBXL10_1g16	XBmRNA20| mogs.L	1.33	1	1	1	1	161.445	0	0	1.79556e+06	11121.8	>1000	826	93.4853	9.02686
XBXL10_1g35192	XBmRNA66440| pgrmc1.L	11.86	1	2	2	2	707.367	0	0	1790786	2531.62	>1000	177	20.191	4.98291
XBXL10_1g22885	XBmRNA42637| ugp2.L	6.3	2	3	3	3	748.25	0	0	1.77581e+06	2373.29	>1000	508	56.3685	7.62061
XBXL10_1g30622	XBmRNA57684| ndufb8.L	5.53	2	1	1	2	299.125	4.36618e+06	14596.5	1.76225e+06	5891.36	>1000	199	23.0812	8.49951
XBXL10_1g19763	XBmRNA36556| mpst.L	8.36	2	2	2	2	503.293	0	0	1.75501e+06	3487.05	>1000	299	33.6527	6.60986
XBXL10_1g3331	XBmRNA6071| me2.L	1.2	2	1	1	1	119.796	0	0	1.75024e+06	14610.1	>1000	583	65.2113	6.3667
XBXL10_1g22209	XBmRNA41286| itpr1.S	0.92	2	2	2	2	50.2034	0	0	1.7343e+06	34545.4	>1000	2729	310.515	6.22705
XBXL10_1g1972	XBmRNA3504| haus6.L	2.86	1	2	3	3	31.2826	0	0	1.73403e+06	55431.1	>1000	978	110.581	6.52197
XBXL10_1g7552	XBmRNA14190| asl.L	5.31	1	2	2	2	619.787	0	0	1.72308e+06	2780.11	>1000	490	54.8857	6.84424
XBXL10_1g27563	XBmRNA51710| gmds.L	3.79	2	2	2	3	118.785	0	0	1.72307e+06	14505.7	>1000	369	41.4259	7.31299
XBXL10_1g24183	XBmRNA45257| hdlbp.L	2.03	2	2	2	2	97.9626	0	0	1.71991e+06	17556.8	>1000	1281	143.064	6.80029
XBXL10_1g21528	XBmRNA39889| acadm.S	3.55	2	1	1	1	155.186	0	0	1.71565e+06	11055.4	>1000	422	46.1984	8.33838
XBXL10_1g10226	XBmRNA19126| ap2b1.S	1.88	2	2	2	2	366.723	0	0	1.70293e+06	4643.65	>1000	958	106.345	5.2876
XBXL10_1g12505	XBmRNA23397| poc1b.L	4.06	1	2	2	2	8.50255	0	0	1.69463e+06	199308	>1000	468	52.0831	7.72314
XBXL10_1g3866	XBmRNA7071| spcs3.S	11.11	2	2	2	2	133.077	0	0	1.68668e+06	12674.5	>1000	180	20.3055	8.63135
XBXL10_1g27409	XBmRNA51403| pdia4.L	2.98	1	2	2	2	961.923	0	0	1.68094e+06	1747.47	>1000	637	71.7093	5.46533
XBXL10_1g6262	XBmRNA11758| gart.L	6.12	1	4	4	4	647.792	0	0	1.64984e+06	2546.87	>1000	1013	105.992	6.55127
XBXL10_1g4256	XBmRNA7862| hnrnpdl.S	5.52	2	1	1	1	104.082	0	0	1.62965e+06	15657.4	>1000	290	32.7882	8.85107
XBXL10_1g6129	XBmRNA11458| mael.L	7.18	1	2	2	2	95.4906	0	0	1.61999e+06	16964.9	>1000	418	47.2974	8.01611
XBXL10_1g15130	XBmRNA28213| tigar.S	6.55	1	2	2	2	102.218	0	0	1.60982e+06	15749	>1000	275	30.7175	7.48877
XBXL10_1g18919	XBmRNA34865| vac14.L	6.14	1	4	4	4	96.8512	0	0	1.5897e+06	16413.8	>1000	782	88.8307	6.17627
XBXL10_1g19250	XBmRNA35580| btf3l4.L	4.43	1	1	1	1	1792.79	0	0	1.57909e+06	880.8	>1000	158	17.265	6.81494
XBXL10_1g42789	XBmRNA80445| gps1.S	7.95	2	2	2	2	2.26053	0	0	1.56249e+06	691205	>1000	239	27.0554	5.40186
XBXL10_1g41853	XBmRNA78794| xnf7.L	1.15	2	1	1	1	174.842	0	0	1.5484e+06	8855.98	>1000	609	68.8323	5.89697
XBXL10_1g40860	XBmRNA77056| bzw1.L	2.39	2	1	1	1	192.92	0	0	1.5412e+06	7988.79	>1000	419	48.1068	6.18896
XBXL10_1g31914	XBmRNA60230| ccndx.L	2.41	2	1	1	1	#N/A	0	#N/A	1.54015e+06	#N/A	>1000	290	32.9186	5.04639
XBXL10_1g20008	XBmRNA37018| slc25a20.L	2.66	1	1	1	1	362.818	0	0	1.53399e+06	4228	>1000	301	32.793	9.37842
XBXL10_1g31838	XBmRNA60085| LOC108696758	1.09	2	1	1	1	118.37	0	0	1.49541e+06	12633.4	>1000	733	83.7797	6.3667
XBXL10_1g42683	XBmRNA80256| nsfl1c.S	7.84	1	1	2	2	556.404	0	0	1.46394e+06	2631.08	>1000	370	40.6053	5.12256
XBXL10_1g14125	XBmRNA26656| eif3g.L	7.79	2	2	2	2	592.921	0	0	1.41561e+06	2387.51	>1000	308	34.4385	7.38623
XBXL10_1g37892	XBmRNA71638| kif4a.S	1.63	1	2	2	2	140.091	0	0	1.40813e+06	10051.6	>1000	1226	138.838	6.68311
XBXL10_1g7454	XBmRNA14045| dtx2.L	3.72	2	2	2	2	1.97703	0	0	1.39828e+06	707262	>1000	592	64.7049	8.71924
XBXL10_1g39473	XBmRNA74400| nsfl1c.L	7.84	1	1	2	2	601.723	0	0	1.3503e+06	2244.06	>1000	370	40.6283	5.13525
XBXL10_1g12962	XBmRNA24540| sec11a.L	5.03	2	1	1	1	74.7126	0	0	1293351	17311	>1000	179	20.5899	9.14404
XBXL10_1g15719	XBmRNA29365| LOC121402032	2.74	6	1	1	1	#N/A	0	#N/A	1.2825e+06	#N/A	>1000	401	44.2708	7.97217
XBXL10_1g27953	XBmRNA52477| XB5953084.L	4.67	1	4	4	4	183.185	0	0	1.26543e+06	6907.93	>1000	814	91.3152	5.79541
XBXL10_1g42492	XBmRNA79876| ube2v1.S	9.14	5	2	2	2	425.923	0	0	1.26349e+06	2966.48	>1000	186	20.7735	8.68994
XBXL10_1g19717	XBmRNA36476| rangap1.L	7.88	2	4	4	4	326.356	0	0	1.24174e+06	3804.85	>1000	584	63.4068	4.66553
XBXL10_1g27162	XBmRNA50843| ngly1.L	1.1	3	1	1	1	34.8604	0	0	1.23515e+06	35431.5	>1000	635	72.4844	6.60986
XBXL10_1g32239	XBmRNA60734| ubxn10.L	2.79	1	1	1	3	#N/A	1.45466e+06	#N/A	1.23183e+06	#N/A	>1000	251	28.0871	8.47021
XBXL10_1g38543	XBmRNA72747| atp6v1d.S	11.38	2	2	2	2	158.551	546166	3444.74	1.17216e+06	7392.94	>1000	246	28	9.5249
XBXL10_1g33734	XBmRNA63714| aldh16a1.S	1.11	2	1	1	1	202.701	0	0	1.16903e+06	5767.25	>1000	811	89.3373	6.55127
XBXL10_1g7301	XBmRNA13736| eif3i.L	6.46	2	2	2	2	392.653	0	0	1149896	2928.53	>1000	325	36.4725	5.51611
XBXL10_1g39235	XBmRNA73952| nsf.L	3.35	2	2	2	2	198.367	0	0	1.14293e+06	5761.69	>1000	746	82.965	6.88818
XBXL10_1g35575	XBmRNA67185| c19orf47.L	6.82	1	1	2	2	#N/A	0	#N/A	1.13912e+06	#N/A	>1000	396	42.7848	10.2866
XBXL10_1g38345	XBmRNA72443| c19orf47.S	6.8	1	1	2	2	9.77349	0	0	1.13912e+06	116552	>1000	397	42.8737	10.1841
XBXL10_1g7055	XBmRNA13223| rnpep.L	1.62	2	1	1	1	219.105	0	0	1.09993e+06	5020.08	>1000	618	70.2224	6.34131
XBXL10_1g19497	XBmRNA36042| slc25a24.L	1.69	2	1	1	1	#N/A	0	#N/A	1.0923e+06	#N/A	>1000	473	52.323	8.42627
XBXL10_1g15943	XBmRNA29794| idh3a.S	2.14	2	1	1	1	209.951	0	0	1.0529e+06	5014.99	>1000	374	40.9368	7.69385
XBXL10_1g30894	XBmRNA58339| pgd.L	2.28	2	1	1	1	195.441	0	0	1.03187e+06	5279.71	>1000	482	53.5331	7.06396
XBXL10_1g18535	XBmRNA34109| nup93.L	0.98	1	1	1	1	310.45	0	0	917600	2955.71	>1000	819	93.2583	5.92236
XBXL10_1g40420	XBmRNA75994| clasp1.L	0.46	2	1	1	1	16.8392	0	0	891441	52938.5	>1000	1534	169.107	8.89502
XBXL10_1g1787	XBmRNA3169| smc2.L	1.66	1	1	1	1	164.079	0	0	831538	5067.92	>1000	1202	136.101	8.17725
XBXL10_1g22933	XBmRNA42728| LOC108716607	1.22	1	1	1	1	40.9211	0	0	827104	20212.2	>1000	655	74.131	8.35303
XBXL10_1g34348	XBmRNA64816| gsn.L	11.96	1	2	6	6	975.641	1.55561e+06	1594.45	822885	843.43	>1000	769	84.9912	5.32568
XBXL10_1g14993	XBmRNA27909| dnm1l.S	1.27	2	1	1	1	68.6976	0	0	790974	11513.9	>1000	711	79.4149	7.21045
XBXL10_1g12106	XBmRNA22581| hmmr.L	0.68	1	1	1	1	83.0997	0	0	760579	9152.6	>1000	1175	136.733	5.22412
XBXL10_1g34727	XBmRNA65640| trmt12.L	2.21	1	1	1	1	223.859	0	0	674009	3010.86	>1000	408	45.9663	6.68311
XBXL10_1g15220	XBmRNA28380| zp4.S	15.07	1	5	9	131	861.468	5.70069e+06	6617.41	5.77613e+09	6.70498e+06	1013.23	544	59.5965	6.75635
XBXL10_1g17465	XBmRNA32219| XB5888885.S (zp3)	30	1	9	15	101	1541.66	7.61556e+06	4939.83	5.32603e+09	3.45473e+06	699.362	460	50.1606	8.5874
XBXL10_1g14663	XBmRNA27434| XB5888885.L (zp3)	22.08	1	5	11	50	581.222	6.20236e+06	10671.2	4.17602e+09	7.1849e+06	673.296	462	50.5518	8.27979
XBXL10_1g42700	XBmRNA80281| tubg1.S	68.29	1	6	38	285	149.92	6.69485e+06	44656.1	4.02441e+09	2.68437e+07	601.12	451	51.1138	6.13818
XBXL10_1g39517	XBmRNA74482| tubg1.L	68.29	1	4	36	270	#N/A	6.69485e+06	#N/A	4.02441e+09	#N/A	#N/A	451	51.1138	6.13818
XBXL10_1g12062	XBmRNA22504| zp4.L	18.23	1	5	9	81	176.486	3.97832e+06	22541.9	4.00129e+09	2.2672e+07	1005.77	543	59.233	6.39209
XBXL10_1g26013	XBmRNA48677| septin2.S	72.16	1	15	36	234	200.791	2.92513e+06	14568.1	3.8551e+09	1.91996e+07	1317.93	352	40.4257	6.40479
XBXL10_1g24182	XBmRNA45250| septin2.L	78.93	1	15	33	233	373.105	2.92513e+06	7839.96	3.8551e+09	1.03325e+07	1317.93	356	40.902	6.41748
XBXL10_1g40130	XBmRNA75502| septin9.L	53.82	1	13	48	306	293.971	0	0	3.49085e+09	1.18748e+07	>1000	576	65.3257	9.18799
XBXL10_1g43118	XBmRNA81065| septin9.S	45.14	1	10	45	305	63.5824	0	0	3.49085e+09	5.49028e+07	>1000	576	65.355	9.24658
XBXL10_1g27381	XBmRNA51342| septin7.L	58.81	1	20	50	346	178.524	1.42852e+06	8001.83	3.28073e+09	1.83769e+07	2296.59	454	52.8107	6.85889
XBXL10_1g29157	XBmRNA54809| septin7.S	49.89	1	9	38	229	219.239	0	0	2.70937e+09	1.23581e+07	>1000	463	53.8407	8.49951
XBXL10_1g5296	XBmRNA9845| LOC108707132 (septin5.2.S)	61.43	2	12	19	121	44.3018	0	0	2.61011e+09	5.89165e+07	>1000	350	40.3057	6.55127
XBXL10_1g4188	XBmRNA7733| septin11.S	63.02	1	18	50	210	299.23	0	0	2.33975e+09	7.81924e+06	>1000	484	55.6525	8.104
XBXL10_1g38053	XBmRNA71921| septin6.S	58.22	1	13	43	154	130.711	0	0	2.31231e+09	1.76903e+07	>1000	450	51.6343	6.88818
XBXL10_1g35197	XBmRNA66450| septin6.L	52.07	1	14	38	119	81.3633	0	0	2.31231e+09	2.84196e+07	>1000	434	49.9464	6.65381
XBXL10_1g1308	XBmRNA2155| septin11.L	60.81	1	8	32	124	23.3647	0	0	2.2994e+09	9.84136e+07	>1000	444	51.3022	7.1665
XBXL10_1g12275	XBmRNA22944| septin8.L	42.5	1	8	22	65	11.2968	0	0	2.2896e+09	2.02677e+08	>1000	480	55.4677	6.43018
XBXL10_1g16506	XBmRNA30994| septin8.S	53.04	1	13	25	53	22.2098	0	0	1.89437e+09	8.52943e+07	>1000	477	55.0998	6.44287
XBXL10_1g30799	XBmRNA58122| tubgcp2.L	64.96	1	60	60	243	87.6275	2.76181e+06	31517.6	1.28799e+09	1.46985e+07	466.359	896	103.278	6.20166
XBXL10_1g10492	XBmRNA19633| tubgcp3.S	62.69	1	26	70	235	63.1499	1.81564e+06	28751.3	9.29465e+08	1.47184e+07	511.921	906	103.645	7.81104
XBXL10_1g7809	XBmRNA14714| tubgcp3.L	61.95	1	24	68	215	36.3552	1.81564e+06	49941.7	8.46477e+08	2.32835e+07	466.214	904	103.595	7.82568
XBXL10_1g7733	XBmRNA14572| septin10.L	71.9	1	17	43	91	72.3523	0	0	7.53112e+08	1.0409e+07	>1000	452	52.5946	6.72705
XBXL10_1g24430	XBmRNA45719| zpax.L	23.09	1	21	21	65	482.406	0	0	6.48933e+08	1.3452e+06	>1000	905	101.455	6.17627
XBXL10_1g10428	XBmRNA19499| septin10.S	75	1	16	42	75	161.599	0	0	6.1711e+08	3.81878e+06	>1000	452	52.4285	6.68311
XBXL10_1g33108	XBmRNA62519| hspa1l.S	72.15	5	11	68	232	2078.76	1.48002e+08	71197.4	5.44788e+08	262073	3.68094	650	71.1444	5.59229
XBXL10_1g30921	XBmRNA58397| hspa8.L	78.33	7	10	67	223	714.174	1.48002e+08	207236	5.44788e+08	762822	3.68094	646	70.7481	5.40186
XBXL10_1g14651	XBmRNA27409| zpy1.L	23.65	1	17	25	69	105.136	0	0	5.31586e+08	5.05616e+06	>1000	947	107.527	7.06396
XBXL10_1g41224	XBmRNA77784| zp2.L	15.02	1	10	10	42	351.85	0	0	4.98308e+08	1.41625e+06	>1000	699	77.6975	8.11865
XBXL10_1g17460	XBmRNA32202| zpy1.S	25.74	1	14	22	63	118.309	0	0	4.23088e+08	3.57613e+06	>1000	944	107.215	6.82959
XBXL10_1g13269	XBmRNA25153| tubgcp4.L	53	1	13	31	84	33.1233	0	0	4.09067e+08	1.23498e+07	>1000	666	76.0051	6.354
XBXL10_1g15666	XBmRNA29273| tubgcp4.S	47.3	1	6	24	68	14.33	0	0	3.99901e+08	2.79066e+07	>1000	666	75.9991	6.41748
XBXL10_1g17494	XBmRNA32250| LOC108703555 (zp3I.S)	17.9	1	7	7	48	264.438	0	0	3.96558e+08	1.49963e+06	>1000	447	49.1104	7.73779
XBXL10_1g41470	XBmRNA78259| septin12.L	16.5	4	11	12	17	46.6663	0	0	3.81899e+08	8.18361e+06	>1000	891	98.6568	7.66455
XBXL10_1g12718	XBmRNA23889| tubgcp6.L	41.15	1	71	71	132	19.6784	0	0	2.70845e+08	1.37636e+07	>1000	1796	203.21	6.37939
XBXL10_1g34635	XBmRNA65454| hspa5.L	31	1	1	19	32	2004.49	4.25297e+07	21217.2	2.26024e+08	112759	5.3145	658	72.6425	5.07178
XBXL10_1g30178	XBmRNA56795| gapdh.L	48.35	1	7	17	33	5808.35	7.54137e+07	12983.7	2.02411e+08	34848.2	2.68401	333	35.8793	8.25049
XBXL10_1g6597	XBmRNA12348| LOC108707995 (septin4.L)	2.52	1	1	2	2	#N/A	0	#N/A	1.5169e+08	#N/A	#N/A	635	75.5713	5.36377
XBXL10_1g7782	XBmRNA14655| LOC108708438 (tubgcp5.L)	54.56	1	57	57	108	26.402	0	0	1.46266e+08	5.53996e+06	>1000	1019	117.358	5.92236
XBXL10_1g34175	XBmRNA64463| tubb4b.L	45.62	12	8	18	37	903.954	2.9285e+07	32396.6	1.30456e+08	144317	4.4547	445	49.784	4.89404
XBXL10_1g17216	XBmRNA31918| tubb4a.S	39.41	6	5	15	31	818.643	2.9285e+07	35772.6	1.30456e+08	159356	4.4547	444	49.7179	4.91943

## Sheet: Sheet1
	XBXL10_1g34727	XBmRNA65640| trmt12.L
	XBXL10_1g12106	XBmRNA22581| hmmr.L
	XBXL10_1g14993	XBmRNA27909| dnm1l.S
	XBXL10_1g34348	XBmRNA64816| gsn.L
	XBXL10_1g22933	XBmRNA42728| LOC108716607
	XBXL10_1g1787	XBmRNA3169| smc2.L
	XBXL10_1g40420	XBmRNA75994| clasp1.L
	XBXL10_1g18535	XBmRNA34109| nup93.L
	XBXL10_1g30894	XBmRNA58339| pgd.L
	XBXL10_1g15943	XBmRNA29794| idh3a.S
	XBXL10_1g19497	XBmRNA36042| slc25a24.L
	XBXL10_1g7055	XBmRNA13223| rnpep.L
	XBXL10_1g35575	XBmRNA67185| c19orf47.L
	XBXL10_1g38345	XBmRNA72443| c19orf47.S
	XBXL10_1g39235	XBmRNA73952| nsf.L
	XBXL10_1g7301	XBmRNA13736| eif3i.L
	XBXL10_1g33734	XBmRNA63714| aldh16a1.S
	XBXL10_1g38543	XBmRNA72747| atp6v1d.S
	XBXL10_1g32239	XBmRNA60734| ubxn10.L
	XBXL10_1g27162	XBmRNA50843| ngly1.L
	XBXL10_1g19717	XBmRNA36476| rangap1.L
	XBXL10_1g42492	XBmRNA79876| ube2v1.S
	XBXL10_1g27953	XBmRNA52477| XB5953084.L
	XBXL10_1g15719	XBmRNA29365| LOC121402032
	XBXL10_1g12962	XBmRNA24540| sec11a.L
	XBXL10_1g39473	XBmRNA74400| nsfl1c.L
	XBXL10_1g7454	XBmRNA14045| dtx2.L
	XBXL10_1g37892	XBmRNA71638| kif4a.S
	XBXL10_1g14125	XBmRNA26656| eif3g.L
	XBXL10_1g42683	XBmRNA80256| nsfl1c.S
	XBXL10_1g31838	XBmRNA60085| LOC108696758
	XBXL10_1g20008	XBmRNA37018| slc25a20.L
	XBXL10_1g31914	XBmRNA60230| ccndx.L
	XBXL10_1g40860	XBmRNA77056| bzw1.L
	XBXL10_1g41853	XBmRNA78794| xnf7.L
	XBXL10_1g42789	XBmRNA80445| gps1.S
	XBXL10_1g19250	XBmRNA35580| btf3l4.L
	XBXL10_1g18919	XBmRNA34865| vac14.L
	XBXL10_1g15130	XBmRNA28213| tigar.S
	XBXL10_1g6129	XBmRNA11458| mael.L
	XBXL10_1g4256	XBmRNA7862| hnrnpdl.S
	XBXL10_1g6262	XBmRNA11758| gart.L
	XBXL10_1g27409	XBmRNA51403| pdia4.L
	XBXL10_1g3866	XBmRNA7071| spcs3.S
	XBXL10_1g12505	XBmRNA23397| poc1b.L
	XBXL10_1g10226	XBmRNA19126| ap2b1.S
	XBXL10_1g21528	XBmRNA39889| acadm.S
	XBXL10_1g24183	XBmRNA45257| hdlbp.L
	XBXL10_1g27563	XBmRNA51710| gmds.L
	XBXL10_1g7552	XBmRNA14190| asl.L
	XBXL10_1g1972	XBmRNA3504| haus6.L
	XBXL10_1g22209	XBmRNA41286| itpr1.S
	XBXL10_1g3331	XBmRNA6071| me2.L
	XBXL10_1g19763	XBmRNA36556| mpst.L
	XBXL10_1g30622	XBmRNA57684| ndufb8.L
	XBXL10_1g22885	XBmRNA42637| ugp2.L
	XBXL10_1g35192	XBmRNA66440| pgrmc1.L
	XBXL10_1g16	XBmRNA20| mogs.L
	XBXL10_1g1945	XBmRNA3457| ptgr1.1.L
	XBXL10_1g23352	XBmRNA43583| hddc2.L
	XBXL10_1g1903	XBmRNA3393| ncln.L
	XBXL10_1g1495	XBmRNA2619| wrn.L
	XBXL10_1g18934	XBmRNA34889| csnk2a2.L
	XBXL10_1g18455	XBmRNA33912| pc.1.L
	XBXL10_1g11375	XBmRNA21377| endoul.L
	XBXL10_1g10670	XBmRNA20044| arf3.S
	XBXL10_1g26372	XBmRNA49272| tmem214.S
	XBXL10_1g21865	XBmRNA40586| agl.S
	XBXL10_1g24037	XBmRNA44959| smc4.L
	XBXL10_1g18912	XBmRNA34848| exosc6.L
	XBXL10_1g2204	XBmRNA4069| psme2.L
	XBXL10_1g40581	XBmRNA76345| orc4.L
	XBXL10_1g10581	XBmRNA19839| pibf1.S
	XBXL10_1g2170	XBmRNA3996| sass6.L
	XBXL10_1g8092	XBmRNA15303| naca.L
	XBXL10_1g1743	XBmRNA3078| bsg.L
	XBXL10_1g39035	XBmRNA73623| npepps.L
	XBXL10_1g26676	XBmRNA49846| LOC108718674
	XBXL10_1g1336	XBmRNA2216| cops4.L
	XBXL10_1g3282	XBmRNA5946| tars1.L
	XBXL10_1g33161	XBmRNA62626| chek1.S
	XBXL10_1g24989	XBmRNA46616| nek2.S
	XBXL10_1g29906	XBmRNA56298| cfap20.S
	XBXL10_1g18916	XBmRNA34857| sf3b3.L
	XBXL10_1g23143	XBmRNA43106| LOC108716684
	XBXL10_1g40465	XBmRNA76120| xrcc5.L
	XBXL10_1g30668	XBmRNA57836| sgpl1.L
	XBXL10_1g26445	XBmRNA49390| abcf2.L
	XBXL10_1g36063	XBmRNA68202| mideas.L
	XBXL10_1g16518	XBmRNA31018| hspa4.S
	XBXL10_1g12991	XBmRNA24586| vps13c.L
	XBXL10_1g7488	XBmRNA14112| glod4.L
	XBXL10_1g15887	XBmRNA29654| znf609.S
	XBXL10_1g28698	XBmRNA53930| gars1.S
	XBXL10_1g21393	XBmRNA39593| lsm14a.S
	XBXL10_1g43634	XBmRNA82144| ehhadh.S
	XBXL10_1g34069	XBmRNA64263| LOC108697842
	XBXL10_1g894	XBmRNA1337| cdkn2aip.L
	XBXL10_1g28238	XBmRNA53044| eif3e.L
	XBXL10_1g40827	XBmRNA76940| acadl.L
	XBXL10_1g35925	XBmRNA67896| rcor1.L
	XBXL10_1g22193	XBmRNA41257| rpl29.S
	XBXL10_1g7908	XBmRNA14947| uchl3.L
	XBXL10_1g38401	XBmRNA72543| pak4.S
	XBXL10_1g22810	XBmRNA42491| capn11.L
	XBXL10_1g24605	XBmRNA45994| rab10.L
	XBXL10_1g6868	XBmRNA12868| rpa2.L
	XBXL10_1g40989	XBmRNA77321| hspe1.L
	XBXL10_1g2827	XBmRNA5039| vps33a.L
